# Supplementary material for: Effects of a 12-week, seated, virtual, home-based tele-exercise programme compared with a prerecorded video-based exercise programme in people with chronic neurological impairments: protocol for a randomised controlled trial
Source: PubMed Central journal article supplement — BMJ Open. 2023 Jan 24;13(1):e065032. doi: 10.1136/bmjopen-2022-065032 (PMC9884574; doi:10.1136/bmjopen-2022-065032), 2023-01-24
Supplement: bmjopen-2022-065032.draft_revisions.pdf [file bmjopen-2022-065032.draft_revisions.pdf]

# BMJ Open

BMJ Open is committed to open peer review. As part of this commitment we make the peer review history of every article we publish publicly available.

When an article is published we post the peer reviewers' comments and the authors' responses online. We also post the versions of the paper that were used during peer review. These are the versions that the peer review comments apply to.

The versions of the paper that follow are the versions that were submitted during the peer review process. They are not the versions of record or the final published versions. They should not be cited or distributed as the published version of this manuscript.

BMJ Open is an open access journal and the full, final, typeset and author-corrected version of record of the manuscript is available on our site with no access controls, subscription charges or pay-per-view fees (<http://bmjopen.bmj.com>).

If you have any questions on BMJ Open's open peer review process please email [info.bmjopen@bmj.com](mailto:info.bmjopen@bmj.com)

# BMJ Open

## Home based tele-exercise for people with Chronic Neurological Impairments, COVID-19 and beyond: Protocol for a randomized control trial (RCT)

|                               |                                                                                                                                                                                                                                                                                                                                                                          |
|-------------------------------|--------------------------------------------------------------------------------------------------------------------------------------------------------------------------------------------------------------------------------------------------------------------------------------------------------------------------------------------------------------------------|
| Journal:                      | <i>BMJ Open</i>                                                                                                                                                                                                                                                                                                                                                          |
| Manuscript ID                 | bmjopen-2022-065032                                                                                                                                                                                                                                                                                                                                                      |
| Article Type:                 | Protocol                                                                                                                                                                                                                                                                                                                                                                 |
| Date Submitted by the Author: | 10-Jul-2022                                                                                                                                                                                                                                                                                                                                                              |
| Complete List of Authors:     | Divecha, Ayushi A.; Burke Neurological Institute<br>Bialek, Amy; Burke Neurological Institute<br>Kumar, Devina S.; Burke Neurological Institute<br>Garn, Rachel; Burke Neurological Institute<br>Currie, Lydia; Burke Neurological Institute<br>Campos, Talita; Burke Neurological Institute<br>Friel, Kathleen M.; Burke Neurological Institute; Weill Cornell Medicine |
| Keywords:                     | COVID-19, Rehabilitation medicine < INTERNAL MEDICINE, Neurology < INTERNAL MEDICINE                                                                                                                                                                                                                                                                                     |
|                               |                                                                                                                                                                                                                                                                                                                                                                          |

SCHOLARONE™  
Manuscripts

1  
2  
3 Home based tele-exercise for people with Chronic Neurological Impairments, COVID-19  
4  
5 and beyond: Protocol for a randomized control trial (RCT)  
6  
7  
8  
9

10  
11 Ayushi A. Divecha<sup>1</sup>, Amy Bialek<sup>1</sup>, Devina S. Kumar<sup>1</sup>, Rachel M. Garn<sup>1</sup>, Lydia E. J.  
12  
13 Currie<sup>1</sup>, Talita Campos<sup>1</sup>, Kathleen M. Friel<sup>1,2</sup>  
14  
15

16  
17  
18  
19 <sup>1</sup>Burke Neurological Institute, White Plains, NY and <sup>2</sup>Weill Cornell Medicine, New York,  
20  
21 NY, USA  
22  
23

24  
25  
26  
27 Address All Scientific and Public Correspondence to:

28  
29  
30 Kathleen M. Friel, PhD  
31  
32

33  
34 Clinical Laboratory for Early Brain Injury Recovery,  
35  
36

37  
38 Burke Neurological Institute, White Plains, NY and  
39

40  
41 Weill Cornell Medicine, New York, NY, USA  
42

43  
44 Phone Number 914-368-3116  
45

46  
47 [kaf3001@med.cornell.edu](mailto:kaf3001@med.cornell.edu)  
48

49  
50 Word count: 3910  
51

52  
53 Keywords: Tele-exercise, chronic neurological impairments, home-based, virtual  
54  
55 training.  
56  
57  
58  
59

## Abstract

**Introduction:** Exercise is vital to staying well and preventing secondary complications in people with Chronic Neurological Impairments (CNI). Appropriate exercise is often inaccessible to this population and effectiveness of virtual programs has seldom been studied. The purpose of the study is to investigate the effects of a 12-week seated virtual exercise program on heart rate, recovery, fatigue, pain, motivation, enjoyment, and quality of life in people with CNI. **Methods and Analysis:** Individuals with CNI will be screened for eligibility, and a total of 60 participants will be randomized into either a live or pre-recorded group. The live group will exercise with an instructor via Zoom while the pre-recorded group will exercise at their chosen time using pre-recorded videos. Heart rate during exercise/recovery, fatigue, motivation, level of pain and exertion will be assessed before and after each session. Physical well-being, enjoyment of physical activity, motivation, and quality of life will be assessed at baseline, midpoint, end of study, and one-month post-study. Adverse events, medication changes, and physical activity will be tracked throughout. Within-group and between-group comparisons will be performed using Wilcoxon Rank-Sum and Kruskal Wallis tests, respectively. **Ethics and Dissemination:** NCT04564495. Registered on September 25, 2020. Protocol version 1, dated May 15, 2022. Funded by Sabrina Cohen Foundation, the Burke Foundation, and grant number UL1 TR 002384 from the National Center for Advancing Translational Sciences (NCATS) of the National Institutes of Health (NIH).

## Strengths and Limitations

### Strengths

1. This is the first study to evaluate the impact of virtual adaptive seated exercises on cardiovascular function in individuals with chronic neurological impairments during COVID-19.
2. If objectives are met, individuals may be able to participate in virtual exercise programs without any expenditure of cost, travel, or time for community and fitness centers.
3. This study will use a comprehensive set of physiological and behavioral assessment measures to correlate effects of moderate intensity exercises on personal engagement and wellness.

### Limitations

1. For those participants with limited technological experience, difficulty using blood pressure devices and heart rate monitors will cause missing data values.
2. The study population includes participants with any neurological diagnosis; thus, it is possible that the findings will not be generalizable to a specific sub-population.

## Introduction

Exercise is a vital component to staying well and preventing secondary impairments. Exercise is known to positively influence a range of factors including cardiovascular health, cognition, mental health, bone health, sleep, and quality of life, among many others<sup>1-8</sup>. The benefits of exercise are further amplified in the estimated one billion people worldwide with Chronic (> 6 months) Neurological Impairments (CNI), as the injuries often lead to sedentary lifestyles and thus higher rates of obesity and cardiovascular disease. Incorporating an exercise regimen is vital to preventing secondary complications such as muscular weakness, fatigue, limited mobility, pain, spasticity, bone loss, and increased risk of fractures, falls, diabetes, depression, and obesity<sup>7-10</sup>. Exercise can be neuroprotective and neuro-regenerative by increasing neurotrophic factors, which are involved in neuroprotection, neuroplasticity, and maintenance of neuronal health<sup>2, 11-15</sup>. Exercise can also improve muscle strength and bone integrity in people with CNI<sup>16-18</sup>.

People with CNI often cannot access community exercise centers, as mobility can be more difficult, insurance payments sparse, centers not welcoming or accessible, and assistive exercise equipment too costly for most facilities<sup>19-32</sup>. The COVID-19 pandemic has further reduced exercise options for people with disabilities, since many of these individuals are at increased risk of COVID-19 complications and therefore often cannot return to fitness centers.

Another key barrier to exercise for people with CNI is transportation<sup>33</sup>. Although COVID-19 introduced many new barriers to community participation, it also had some silver

1  
2  
3 linings for people with CNI. COVID-19 resulted in the emergence of many new Zoom or  
4  
5 online classes tailored to people with CNI, which removed the barrier of transportation.  
6  
7

8 This study will examine the cardiovascular benefits, as well as differences in  
9  
10 compliance, motivation and feelings of socialization and exertion between synchronous  
11  
12 and asynchronous classes. The classes will be held for 12 weeks, 3 times/week using  
13  
14 seated exercise via Zoom. The instructor will remain the same and alternate between  
15  
16 boxing, high intensity interval training (HIIT) and power posture classes. We will  
17  
18 examine the potential benefits of an accessible form of exercise for a population that is  
19  
20 in urgent need, during times of COVID-19 and beyond. Additionally, by comparing live  
21  
22 group synchronous and solo pre-recorded asynchronous classes, we will compare user  
23  
24 compliance, motivation, enjoyment, and socialization.  
25  
26  
27  
28

29 We hypothesize that individuals in the synchronous class will have better attendance,  
30  
31 more robust exertion as measured by heart rate, and better enjoyment than people in  
32  
33 the asynchronous class, due to the social component of the synchronous classes. We  
34  
35 hypothesize that participants in both groups will show improvement in heart rate  
36  
37 recovery, physical wellness, quality of life, enjoyment, and motivation/engagement, and  
38  
39 that changes will be greater in the synchronous class due to consistent supervision and  
40  
41 contact.  
42  
43  
44  
45  
46  
47  
48

## 49 **Methods and Analysis**

### 50 **Study Design**

1  
2  
3 This study is a parallel randomized controlled trial to investigate the effects of a 12-  
4 week, 3 times/week, seated tele-exercise program for adults with chronic neurological  
5 impairments (Figure 1). All 36 exercise sessions will be completed online via Zoom with  
6 the physical exercise instructor (live, synchronous group) or offline using recorded  
7 videos (pre-recorded, asynchronous group). Participants will be in their own homes as  
8 they complete the exercise classes. Participants can continue their medications,  
9 physical, occupational, speech therapies, and existing exercise routines (2 times/week  
10 or fewer).

### 21 22 **Eligibility Criteria and Participants**

23  
24  
25 The eligibility criteria will be kept broad to accommodate all neurological impairments.

#### 26 27 28 Inclusion Criteria:

- 29  
30  
31 1. Participants diagnosed with Chronic (>6 months) Neurological Impairments
  - 32  
33 2. Ages 18 to 75 years
  - 34  
35 3. Able to sit for at least 1 hour
  - 36  
37 4. Stable Heart rate (HR) and Blood Pressure (BP)
  - 38  
39 5. Medical clearance to participate in moderate intensity exercises
  - 40  
41 6. Can don and doff a wrist HR monitor with or without assistance
  - 42  
43 7. Can maintain daily exercise and physical activity during the study
  - 44  
45 8. No other neurological, medical or cognitive impairments
  - 46  
47 9. Able to access the internet and use the cloud-based Zoom conference platform
  - 48  
49 10. Ability to speak and understand English
  - 50  
51 11. Currently exercising 2 days or less per week
- 52  
53  
54  
55  
56  
57  
58  
59  
60



1  
2  
3 12. Presence of caregiver or supervisor during exercise, for safety  
4  
5

6 Exclusion Criteria:  
7

- 8  
9 1. Unstable or uncontrolled medical conditions  
10  
11 2. Medical issues preventing safe participation  
12  
13 3. Unable to follow simple 2-step commands  
14  
15

16  
17  
18  
19 **Number of Participants**  
20

21  
22 We plan to conduct multiple cohorts of participants, each with different participant  
23  
24 populations, e.g., multiple sclerosis, cerebral palsy, stroke, spinal cord injury.  
25

26  
27 For each cohort, with 25 participants in the synchronous and asynchronous groups, we  
28  
29 will have 80% power to detect a change in mean heart rate from about 80 bpm to 100  
30  
31 bpm (or greater) at 12 weeks (final session) (in each group, separately), using a paired  
32  
33 t-test with a 0.05 two-sided significance level. This calculation assumes a conservative  
34  
35 standard deviation of the pre/post differences in heart rate of 35 bpm at 12 weeks (final  
36  
37 session). We plan for a 20% dropout rate, which means that we will recruit 30  
38  
39 participants per group to achieve 80% power.  
40  
41  
42  
43  
44  
45  
46

47 **Recruitment**  
48

49  
50 Participants will be recruited via the Sabrina Cohen Foundation, which has a network of  
51  
52 people with chronic neurological disabilities, and by BNI who has a database of  
53  
54 potential participants from prior studies or programs. We will also post our recruitment  
55  
56  
57  
58  
59  
60

1  
2  
3 flier on our website, social media, and will mail it to neurological patient advocacy  
4  
5 groups. If we cannot recruit appropriate numbers using these methods, we will pursue  
6  
7 paid advertising in our community.  
8  
9

## 10 11 12 13 **Randomization**

14  
15  
16 One study team member will generate a series of permuted randomized blocks in a  
17  
18 computerized spreadsheet with a defined block size of 4. Participants will be allocated  
19  
20 to either the live (synchronous) or pre-recorded (asynchronous) group, with a 1:1 ratio  
21  
22 between groups. Due to the nature of the intervention, it is not possible to conceal  
23  
24 allocation from the participants or the study team. However, the two groups will never  
25  
26 interact with one another.  
27  
28  
29  
30  
31  
32  
33

## 34 **Blinding and Rigor of Data**

35  
36  
37 Due to the nature of the study, blinding of participants and study team members to  
38  
39 group allocation will not be possible. All participants will complete the outcome surveys  
40  
41 directly online, without input or assistance from the study team. Heart rate data will be  
42  
43 collected through a heart rate monitor that collects quantitative data without input or  
44  
45 filtering by the study team.  
46  
47  
48  
49  
50  
51

## 52 **Intervention**

53  
54  
55  
56  
57  
58  
59  
60

1  
2  
3 The exercise intervention will be delivered by a trained professional who specializes in  
4 adaptive exercise for individuals with CNI. The instructor will structure each class to  
5 ensure standardization in terms of class structure, including warm-up, cool-down, cues  
6 for recording heart rate during class, use of additional equipment, and adherence to the  
7 general study protocol.  
8  
9  
10  
11  
12  
13

14  
15 All participants, regardless of allocation to live or pre-recorded groups, will participate in  
16 45 minutes of aerobic exercise intervention, three times a week, for a period of 12  
17 weeks. The overall exercise session will be up to one hour long to include measuring  
18 vitals, answering questions before/after sessions, and rest breaks (if any). Two  
19 additional weeks will be provided for making up missed sessions, if applicable. Each  
20 intervention will be preceded by a warm-up and followed by a cool-down period. All  
21 participants will be asked to document any adverse events and changes in medications  
22 before each session. The order of classes will be rotated. Individual aerobic  
23 interventions for the first cohort are described below.  
24  
25  
26  
27  
28  
29  
30  
31  
32  
33  
34

35  
36 High intensity interval training (HIIT): HIIT involves repetitive bouts of high intensity  
37 exercises with intermittent periods of rest or active recovery. Exercise intensity could be  
38 as high as 80-100 percent of maximal heart rate during the intense circuits, but the  
39 duration of each bout of high intensity is about 10-30 seconds. Since this study will  
40 include participants with variable neurological impairments, the upper limit of exercise  
41 intensity in HIIT will be dependent on instructor's judgement, participant feedback, and  
42 rate of perceived exertion.  
43  
44  
45  
46  
47  
48  
49  
50  
51

52  
53 Boxing: Boxing involves a circuit of individual and combinations of moves like 'jabs',  
54 'hooks', and 'uppercuts.' Boxing is a moderate to high intensity aerobic activity by  
55  
56  
57  
58  
59  
60

1  
2  
3 nature. Traditionally, bouts of upper body punching moves are planned around  
4  
5 'shuffling' to promote active recovery. All interventions will be done in a seated position  
6  
7 to ensure participants' safety in their home environments. Active recovery will include  
8  
9 upper body shuffling motions, relaxed upper body movements, etc. The exercise  
10  
11 intensity for boxing, as in HIIT, will be subjective for participants based on level of  
12  
13 perceived exertion as well as exercise heart rate restrictions, if any.  
14  
15

16  
17 Power posture: Power posture is a HIIT-style strength and endurance class that  
18  
19 promotes postural awareness. The warm-up period will be 5-10 minutes and focused on  
20  
21 education of movement with slow, gentle repetitions to prepare the trapezius and other  
22  
23 supporting scapular muscles for movement. This HIIT workout will target form, with fast  
24  
25 paced targeted movements for 10-12 minutes. The cool-down will focus on gentle deep  
26  
27 neck flexor/extensor chin tuck exercises, range of motion, and stretching.  
28  
29  
30  
31  
32  
33  
34

### 35 **Virtual Nature of the Study**

36  
37  
38 Each aspect of this study will be performed virtually. Screenings will be performed on  
39  
40 the telephone, with a standard list of criteria asked of each person. If deemed eligible,  
41  
42 the potential participant will be sent a Zoom link to go through the informed consent on  
43  
44 a one-to-one basis. The informed consent will be uploaded to REDCap, a secure web  
45  
46 application for building and managing online surveys and databases. REDCap is 21  
47  
48 CFR Part 11-ready and HIPAA compliant and is specifically geared to support online  
49  
50 and offline data capture for research studies and operations.  
51  
52  
53  
54  
55  
56  
57  
58  
59  
60

1  
2  
3 To obtain informed consent directly from participants, a study team member will arrange  
4 a Zoom call with each participant. The informed consent will be signed virtually by  
5 sharing a virtual remote with the participant during the call. If anyone has difficulty, they  
6 can be sent the informed consent from REDCap via email and return it to REDCap just  
7 as easily. Each participant will be sent a copy of their signed consent form via the same  
8 REDCap email system.  
9  
10  
11  
12  
13  
14  
15  
16

17 Each participant will be mailed a home exercise kit, which will contain a Polar optical  
18 heart rate monitor (OH1), yellow and green resistance TheraBands and wrist weights.  
19  
20  
21  
22

23 All questionnaires and questions to be answered before and after each class will be  
24 sent from and stored on REDCap. All heart rate data will be transmitted to the Polar  
25 website, which can be accessed only by the participant or the researchers. Then, the  
26 data will be analyzed in MATLAB using custom scripts written by the study team.  
27  
28  
29  
30  
31  
32  
33  
34  
35

### 36 **Study Safety**

37  
38 We will monitor side effects before and after each session by having participants  
39 complete surveys on REDCap. If pain or blood pressure are higher than usual, we will  
40 ask the participant if they wish to continue. If blood pressure rises near limitations  
41 prescribed by a participant's doctor, we will discontinue the participant. If any injury  
42 occurs during or outside of study sessions that may increase the risk of further injury,  
43 we will discontinue the participant.  
44  
45  
46  
47  
48  
49  
50  
51  
52

### 53 **Patient and Public Involvement**

1  
2  
3 Persons with disabilities were involved in the design of this study, and will be involved in  
4 the conduct, reporting, and dissemination plans of this research.  
5  
6  
7  
8  
9

## 10 11 **Strategies to improve adherence**

12  
13  
14 The study team will take attendance at each synchronous session and will monitor  
15 session completions for the asynchronous group. If a participant misses a class, we will  
16 reach out and inquire about their ability to attend future sessions. We have *a priori* set a  
17 minimum number of 30 of 36 classes that a participant must attend to be included in the  
18 main analyses of the study. We will offer 2 weeks of makeup sessions at the end of the  
19 12 weeks. If a participant drops out before completing 30 sessions, we will encourage  
20 them to complete the post-study outcome measures and the satisfaction survey. We will  
21 use the number of sessions completed as a covariate in the analyses.  
22  
23  
24  
25  
26  
27  
28  
29  
30  
31  
32  
33  
34  
35  
36  
37  
38  
39  
40  
41  
42  
43  
44  
45  
46  
47  
48  
49  
50  
51  
52  
53  
54  
55  
56  
57  
58  
59  
60

## **Outcome Measures**

### **Session-specific Measures**

Session-specific outcomes will capture changes before, during, and after each exercise session for both groups.

### **Heart rate tracking**

Continuous heart rate tracking is the primary outcome measure for the study. All participants will receive the OH1 Polar HR monitor as part of their exercise kit for the study (Figure 2). Scheduled virtual training sessions will be held to train participants for

1  
2  
3 donning/doffing the heart rate monitor, using the Polar app, using their Polar accounts,  
4  
5 syncing the Polar devices with their smartphones and starting/ending their heart rate  
6  
7 tracking during exercise sessions. Heart rate (HR) tracking for exercise sessions begins  
8  
9 at the start of the session and ends at 10 minutes after completion of session to capture  
10  
11 heart rate during exercise (at 10Hz) as well as HR recovery after the end of exercise  
12  
13 sessions. The live group will be supervised by the research team for each session. The  
14  
15 pre-recorded groups will have the research team available for assistance and  
16  
17 troubleshooting. Data are stored on the Polar Coach website, where study staff can  
18  
19 export sessions as CSV files that are then processed in MATLAB (MathWorks). In  
20  
21 MATLAB, baseline HR, peak HR, HR at end of session, and HR at 30s intervals for  
22  
23 5min after the end of the session will be analyzed, to measure heart rate recovery.  
24  
25  
26  
27  
28

### 29 **Secondary session-specific measures**

30  
31  
32 On the day of the intervention, participants will complete an online assessment to rate  
33  
34 the level of pain and perceived exertion (RPE), BP, HR, and adverse events before and  
35  
36 after the exercise session. After the session is over, participants will complete a lab-  
37  
38 developed survey to rate their experience on a 10-point scale from 1 (not a good  
39  
40 experience) to 10 (very good experience) on questions related to motivation, energy,  
41  
42 satisfaction, and performance. In addition, participants will provide information on  
43  
44 changes related to health, falls, or other adverse events.  
45  
46  
47  
48  
49  
50  
51

### 52 **Timepoint Measures**

1  
2  
3 A comprehensive set of outcome measures will be completed by participants at  
4  
5 baseline, mid-study (6 weeks), end of study (12 weeks) and follow-up after one month.  
6  
7 On study completion, participants will complete a study feedback form. The feedback  
8  
9 will be based on study acceptance, ease of using HR and BP devices and exercise  
10  
11 equipment, and support from the research team. Participants who do not complete the  
12  
13 study will also provide their final timepoint measure at the end of their final exercise  
14  
15 session.  
16  
17  
18  
19

### 20 *Physiological Measure*

21  
22  
23 Polar OH1 Heart Rate (HR) monitor: the Polar OH1 (Polar Electro Inc., Bethpage, NY,  
24  
25 USA) is an optical heart rate sensor on an armband that records HR activity. It has 6  
26  
27 LED sensors that record at 1-second intervals<sup>34</sup>. HR activity is recorded via Bluetooth to  
28  
29 a phone compatible with the Polar Flow or Polar Beat app. It has validity in moderate to  
30  
31 vigorous intensity exercises and high endurance sports activities<sup>34-36</sup>.  
32  
33  
34

### 35 *Surveys and Questionnaires*

36  
37  
38 All questionnaires will be self-administered or administered by a trained researcher  
39  
40 virtually using REDCap.  
41  
42

43 Perceived Wellness Survey (PWS): the PWS is a 36-item instrument used to measure  
44  
45 an individual's perceived health status in physical, psychological, emotional, intellectual,  
46  
47 spiritual, and social wellness constructs. Items under each construct are scored on a  
48  
49 scale of 1 (very strongly disagree) to 6 (very strongly agree). Higher scores indicate  
50  
51 better perceived wellness. The PWS has good reliability and validity in healthy and  
52  
53 neurological populations<sup>37-39</sup>.  
54  
55  
56  
57  
58  
59  
60



1  
2  
3 Physical Activity Enjoyment Scale (PACES): the PACES is a self-assessment measure  
4 of enjoyment with their current physical activity. It is an 18-item scale with scoring from  
5 1 (I enjoy it) to 7 (I hate it). Scores on the bipolar rating scale are summed with higher  
6 scores indicative of more enjoyment. It is reliable and valid in neurological populations<sup>40-</sup>  
7  
8  
9  
10  
11  
12 43.

13  
14  
15 Short Form-36 Health Survey (SF-36): the SF-36 measures physical health and mental  
16 health. There are eight scales - Physical Functioning, Physical Role Limitations, Bodily  
17 Pain, General Health, Vitality, Social Functioning, Emotional Role Limitations, and  
18 Mental Health. It is easy to use with good validity and reliability in neurological  
19  
20  
21  
22  
23  
24  
25  
26  
27  
28  
29  
30  
31  
32  
33  
34  
35  
36  
37  
38  
39  
40  
41  
42  
43  
44  
45  
46  
47  
48  
49  
50  
51  
52  
53  
54  
55  
56  
57  
58  
59  
60

populations<sup>44-47</sup>.

Numerical pain rating (NPR) scale: the NPR is a standardized instrument for pain  
assessment in clinical and research practice. It is an 11-point scale from 0 (no pain) to  
10 (the most intense pain) at rest and during movement. It is simple to use with high  
sensitivity to changes in chronic pain in adult populations<sup>48, 49</sup>. It is reliable and valid for  
pain assessments of neurological populations<sup>50</sup>.

Borg's Rating Scale of Perceived Exertion (RPE): the Borg RPE is a widely used  
standardized measure to evaluate perceived intensity of exertion, effort, and fatigue  
during physical exercise. The scale ranges from 6 (no exertion at all) to 20 (absolute  
maximum). Higher ratings on the scale indicate greater overall body exertion. It is a  
reliable and valid measure in neurological populations<sup>51-58</sup>.

Reason for exercise inventory (REI): the REI is a 24-item scale to assess the reason  
that motivates a person to exercise. The modified version has 4 subscales:

1  
2  
3 Weight/appearance management, fitness/health management, stress/emotion  
4 management, and socialization. A 7-point scale ranges from 1 (not at all important) to 7  
5 (extremely important). Higher scores represent greater motivation to exercise<sup>59</sup>.  
6  
7  
8  
9

## 10 11 12 13 **Statistical Methods**

14  
15  
16 Descriptive statistics (including mean, standard deviation, median, interquartile range,  
17 frequency, and percent) will be calculated for demographic and clinical characteristics of  
18 the study participants. For the primary endpoint, heart rate, the two-sample t-test or  
19 nonparametric Wilcoxon Rank-Sum test will be used, as appropriate, to compare the  
20 mean (median) heart rate between the live and pre-recorded groups at 12 weeks (final  
21 session). The paired t-test or Wilcoxon Rank-Sum test will be used, as appropriate, to  
22 compare mean (median) heart rate before and after the final session (at 12 weeks) for  
23 the live and pre-recorded groups, separately. Similar analyses for heart rate (i.e.,  
24 between and within groups) will also be performed after each session. Analysis of  
25 Covariance (ANCOVA) will be used to evaluate the independent effect of live versus  
26 pre-recorded group status on heart rate (at 12 weeks, final session), after controlling for  
27 baseline heart rate and any other factors that may remain imbalanced between groups  
28 after randomization. Adjusted mean differences in heart rate (at 12 weeks, final session)  
29 between the live and pre-recorded groups and 95% confidence intervals for these  
30 differences will be estimated from the multivariable ANCOVA model. Similar analyses  
31 as described above will be performed for other continuous outcomes (primary and  
32 secondary), including blood pressure, Borg's RPE scale, mood, motivation, and pain  
33 scales, Perceived Wellness Survey, SF-36v2 score, etc., at 12 weeks (final session)  
34  
35  
36  
37  
38  
39  
40  
41  
42  
43  
44  
45  
46  
47  
48  
49  
50  
51  
52  
53  
54  
55  
56  
57  
58  
59  
60

1  
2  
3 and other time points of interest. Categorical variables (e.g., safety questions, adverse  
4 events, medication changes, etc.) will be compared between the live and pre-recorded  
5 groups (at baseline, 6 weeks, and 12 weeks) by the chi-square test or Fisher's exact  
6 test, as appropriate. Generalized estimating equations (GEE) modeling will also be  
7 explored to evaluate between-group differences over repeated assessments, and to  
8 account for potential missing data in some of the outcome variables at one or more of  
9 the evaluation time points. All estimates from the multivariable models will serve as  
10 preliminary data (i.e., hypothesis-generating) for future studies. All p-values will be two-  
11 sided with statistical significance evaluated at the 0.05 alpha level. Ninety-five percent  
12 confidence intervals for all parameters of interest will be calculated to assess the  
13 precision of the obtained estimates. All analyses will be performed in R and SPSS.  
14  
15  
16  
17  
18  
19  
20  
21  
22  
23  
24  
25  
26  
27  
28  
29  
30  
31

## 32 **Data Management**

33  
34 Participant identifying information will be kept confidential by providing a unique  
35 identification number (ID number) for the course of the study. To maintain privacy, only  
36 authorized research investigators involved in the study will have access to participant  
37 information. Password protected laptops, online documents, and access to cloud-based  
38 servers will prevent leaks in data privacy. All records including informed consent,  
39 screening tools, medical records, and participant surveys will be completed, and  
40 documented on REDCap, a HIPAA-compliant online research database.  
41  
42  
43  
44  
45  
46  
47  
48  
49  
50

51 Privacy on Zoom platform: Our institutional Zoom account (through Weill Cornell  
52 Medicine) is compliant with HIPAA guidelines. Participant profile names will be updated  
53  
54  
55  
56  
57  
58  
59  
60

1  
2  
3 to display their ID. After each session, the recorded video will be uploaded to the  
4  
5 password protected WCM cloud-based server. Respective group participants will be  
6  
7 given the live Zoom links (synchronous) or passwords to access the asynchronous  
8  
9 Zoom sessions.  
10

11  
12  
13 Polar OH1 HR monitor (Optical HR sensor): Participants' profiles using allotted ID's will  
14  
15 be created in the Polar Beat App and the Flow for Coach cloud-based online platform.  
16  
17 All information uploaded to the platform will be accessible by the investigators using a  
18  
19 secured login ID and password.  
20  
21

22  
23 Adverse events, change in medications, and protocol deviation will be documented and  
24  
25 updated before and after each class on REDCap. The study team will perform weekly  
26  
27 self-audits to ensure data quality and completeness.  
28  
29

### 30 *Procedure for handling missing data*

31

32  
33 This study is an intention-to-treat trial. If data are missing, we will use a mixed linear  
34  
35 regression model that accounts for uneven numbers of data points across participants.  
36  
37  
38  
39  
40

### 41 **Data Monitoring and Stopping Rules**

42  
43

44  
45 Since this is a low-risk study, our IRB determined that a data monitoring committee is  
46  
47 not necessary. We will audit our data weekly and assess safety data at each session. If  
48  
49 we find an increase in pain by 25% or a decrease in quality of life measures by 25%  
50  
51 across participants in a cohort, we will pause the trial and evaluate how to improve the  
52  
53 safety of the study.  
54  
55  
56  
57  
58  
59  
60

## Resource Sharing Plan

We plan to use the concept, methods and analysis as a framework to develop evidence-based protocols for future cohorts and studies. We have made a commitment to publish all relevant scientific information in a timely manner. Unpublished information may be available to interested individuals or organizations by request to the Principal Investigator.

## Ethics and Dissemination

The study has been approved by the BRANY Institutional Review Board 20-08-388-512. All protocol deviations, adverse events, and protocol modifications will be reported to the IRB immediately. The results of the study will be disseminated to the academic community via publications and presentations. The deidentified study data will be shared on our laboratory website.

**Trial Registration:** Clinicaltrials.gov NCT04564495.

**Acknowledgements:** We thank the Sabrina Cohen Foundation for funding and for commitment to assist with study development and recruitment. We thank Devon Palermo at DPI Adaptive Fitness who will serve as the adaptive fitness instructor for this study.

1  
2  
3 **Contributors:** KMF is the Principal Investigator. KMF, AAD and AB were responsible  
4 for ethics applications and reporting. AAD, AB, DSK, RMG, LC and KMF drafted the  
5 final version of this manuscript. All authors have contributed to the writing and critical  
6 review of the manuscript and have approved the final version.  
7  
8  
9  
10  
11

12  
13 **Funding:** This work is supported by funding from the Sabrina Cohen Foundation and  
14 the Burke Foundation. This work is supported by grant number UL1 TR 002384 from the  
15 National Center for Advancing Translational Sciences (NCATS) of the National  
16 Institutes of Health (NIH).  
17  
18  
19  
20  
21  
22

23 **Role of Funder in Study:** The Sabrina Cohen Foundation has established the tele-  
24 exercise classes we are studying and will assist with recruitment. The Sabrina Cohen  
25 Foundation and Burke Foundation will have no role in data collection, analyses,  
26 interpretation, or publication of the work.  
27  
28  
29  
30  
31

32  
33 **Competing Interests:** None to declare  
34  
35  
36  
37  
38  
39  
40  
41  
42  
43  
44  
45  
46  
47  
48  
49  
50  
51  
52  
53  
54  
55  
56  
57  
58  
59  
60

## References

1. Gkatzamanis V, Magriplis E, Panagiotakos D. The effect of physical activity interventions on cognitive function of older adults: A systematic review of clinical trials. *Psychiatriki*. 2022.
2. Johansson ME, Cameron IGM, Van der Kolk NM, de Vries NM, Klimars E, Toni I, et al. Aerobic Exercise Alters Brain Function and Structure in Parkinson's Disease: A Randomized Controlled Trial. *Ann Neurol*. 2022;91(2):203-16.
3. Li Q, Wu C. Social Interaction, Lifestyle, and Depressive Status: Mediators in the Longitudinal Relationship between Cognitive Function and Instrumental Activities of Daily Living Disability among Older Adults. *Int J Environ Res Public Health*. 2022;19(7).
4. Minto LR, Ellis R, Cherry KE, Wood RH, Barber SJ, Carter S, et al. Impact of cardiovascular risk factors on the relationships of physical activity with mood and cognitive function in a diverse sample. *Neuropsychol Dev Cogn B Aging Neuropsychol Cogn*. 2022:1-14.
5. Rosado H, Bravo J, Raimundo A, Carvalho J, Marmeleira J, Pereira C. Effects of two 24-week multimodal exercise programs on reaction time, mobility, and dual-task performance in community-dwelling older adults at risk of falling: a randomized controlled trial. *BMC Public Health*. 2021;21(Suppl 2):408.
6. Schuch FB, Vancampfort D, Firth J, Rosenbaum S, Ward PB, Silva ES, et al. Physical Activity and Incident Depression: A Meta-Analysis of Prospective Cohort Studies. *Am J Psychiatry*. 2018;175(7):631-48.

- 1  
2  
3 7. Yang PY, Ho KH, Chen HC, Chien MY. Exercise training improves sleep quality  
4 in middle-aged and older adults with sleep problems: a systematic review. *J Physiother.*  
5  
6 2012;58(3):157-63.  
7
- 8  
9  
10 8. Yuan Y, Chen X, Zhang L, Wu J, Guo J, Zou D, et al. The roles of exercise in  
11 bone remodeling and in prevention and treatment of osteoporosis. *Prog Biophys Mol*  
12  
13 *Biol.* 2016;122(2):122-30.  
14  
15
- 16  
17  
18 9. Jasinska-Mikolajczyk A, Drews K, Domaszewska K, Kolasa G, Konofalska M,  
19 Jowik K, et al. The Effect of Physical Activity on Neurotrophin Concentrations and  
20  
21 Cognitive Control in Patients With a Depressive Episode. *Front Psychiatry.*  
22  
23 2022;13:777394.  
24  
25
- 26  
27  
28 10. Lampousi AM, Berglind D, Forsell Y. Association of changes in cardiorespiratory  
29 fitness with health-related quality of life in young adults with mobility disability:  
30  
31 secondary analysis of a randomized controlled trial of mobile app versus supervised  
32  
33 training. *BMC Public Health.* 2020;20(1):1721.  
34  
35
- 36  
37  
38 11. Dimyan MA, Cohen LG. Neuroplasticity in the context of motor rehabilitation after  
39 stroke. *Nat Rev Neurol.* 2011;7(2):76-85.  
40  
41
- 42  
43 12. Knaepen K, Goekint M, Heyman EM, Meeusen R. Neuroplasticity - exercise-  
44 induced response of peripheral brain-derived neurotrophic factor: a systematic review of  
45  
46 experimental studies in human subjects. *Sports Med.* 2010;40(9):765-801.  
47  
48
- 49  
50  
51 13. Li C, Ke C, Su Y, Wan C. Exercise Intervention Promotes the Growth of  
52 Synapses and Regulates Neuroplasticity in Rats With Ischemic Stroke Through  
53  
54 Exosomes. *Front Neurol.* 2021;12:752595.  
55  
56  
57  
58  
59  
60



- 1  
2  
3 14. Penna LG, Pinheiro JP, Ramalho SHR, Ribeiro CF. Effects of aerobic physical  
4 exercise on neuroplasticity after stroke: systematic review. *Arq Neuropsiquiatr.*  
5  
6 2021;79(9):832-43.  
7
- 8  
9  
10 15. Phillips C. Lifestyle Modulators of Neuroplasticity: How Physical Activity, Mental  
11 Engagement, and Diet Promote Cognitive Health during Aging. *Neural Plast.*  
12  
13 2017;2017:3589271.  
14
- 15  
16 16. Legerlotz K. The Effects of Resistance Training on Health of Children and  
17 Adolescents With Disabilities. *Am J Lifestyle Med.* 2020;14(4):382-96.  
18
- 19  
20 17. O'Connell ML, Coppinger T, McCarthy AL. The role of nutrition and physical  
21 activity in frailty: A review. *Clin Nutr ESPEN.* 2020;35:1-11.  
22
- 23  
24 18. van der Scheer JW, Martin Ginis KA, Ditor DS, Goosey-Tolfrey VL, Hicks AL,  
25 West CR, et al. Effects of exercise on fitness and health of adults with spinal cord injury:  
26 A systematic review. *Neurology.* 2017;89(7):736-45.  
27
- 28  
29 19. Fleming KM, Herring MP, Coote SB, Tindall D. Participant experiences of eight  
30 weeks of supervised or home-based Pilates among people with multiple sclerosis: a  
31 qualitative analysis. *Disabil Rehabil.* 2021:1-8.  
32
- 33  
34 20. Forgea MC, Lyons AG, Lorenz RA. Barriers and Facilitators to Engagement in  
35 Rehabilitation Among Stroke Survivors: An Integrative Review. *Rehabil Nurs.*  
36  
37 2021;46(6):340-7.  
38  
39  
40  
41  
42  
43  
44  
45  
46  
47  
48  
49  
50  
51  
52  
53  
54  
55  
56  
57  
58  
59  
60

- 1  
2  
3 21. Giroux EE, Casemore S, Clarke TY, McBride CB, Wuerstl KR, Gainforth HL.  
4  
5 Enhancing participation while aging with spinal cord injury: applying behaviour change  
6  
7 frameworks to develop intervention recommendations. *Spinal Cord*. 2021;59(6):665-74.  
8  
9  
10  
11 22. Hickingbotham MR, Wong CJ, Bowling AB. Barriers and facilitators to physical  
12  
13 education, sport, and physical activity program participation among children and  
14  
15 adolescents with psychiatric disorders: a systematic review. *Transl Behav Med*.  
16  
17 2021;11(9):1739-50.  
18  
19  
20  
21 23. Karssemeijer EGA, de Klijn FH, Bossers WJR, Olde Rikkert MGM, van Heuvelen  
22  
23 MJG. Ranking Barriers, Motivators, and Facilitators to Promote Physical Activity  
24  
25 Participation of Persons With Dementia: An Explorative Study. *J Geriatr Phys Ther*.  
26  
27 2020;43(2):71-81.  
28  
29  
30  
31 24. Keramat SA, Ahammed B, Mohammed A, Seidu AA, Farjana F, Hashmi R, et al.  
32  
33 Disability, physical activity, and health-related quality of life in Australian adults: An  
34  
35 investigation using 19 waves of a longitudinal cohort. *PLoS One*. 2022;17(5):e0268304.  
36  
37  
38  
39 25. Kirk TN, Haegele JA, Zhu X. Barriers, Expectancy-Value Beliefs, and Physical  
40  
41 Activity Engagement Among Adults With Visual Impairments. *Adapt Phys Activ Q*.  
42  
43 2021;38(2):286-306.  
44  
45  
46  
47 26. Lindsay RK, Carmichael C, Allen PM, Fossey M, Godier-McBard L, Butler L, et  
48  
49 al. Fishing Participation, Motivators and Barriers among UK Anglers with Disabilities:  
50  
51 Opportunities and Implications for Green Social Prescribing. *Int J Environ Res Public*  
52  
53 *Health*. 2022;19(8).  
54  
55  
56  
57  
58  
59  
60

- 1  
2  
3 27. McDermott G, Brick NE, Shannon S, Fitzpatrick B, Taggart L. Barriers and  
4 facilitators of physical activity in adolescents with intellectual disabilities: An analysis  
5 informed by the COM-B model. *J Appl Res Intellect Disabil*. 2022;35(3):800-25.  
6  
7  
8  
9  
10 28. McKenzie G, Willis C, Shields N. Barriers and facilitators of physical activity  
11 participation for young people and adults with childhood-onset physical disability: a  
12 mixed methods systematic review. *Dev Med Child Neurol*. 2021;63(8):914-24.  
13  
14  
15  
16  
17 29. Nightingale TE, Heneghan NR, Fenton SAM, Veldhuijzen van Zanten J, Jutzeler  
18 CR. Physical Activity and Health-Related Quality of Life in Adults With a Neurologically-  
19 Related Mobility Disability During the COVID-19 Pandemic: An Exploratory Analysis.  
20 *Front Neurol*. 2021;12:699884.  
21  
22  
23  
24  
25  
26  
27 30. Pinto SM, Newman MA, Hirsch MA. Perceived Barriers to Exercise in Adults with  
28 Traumatic Brain Injury Vary by Age. *J Funct Morphol Kinesiol*. 2018;3(3).  
29  
30  
31  
32 31. Porteny T, Alegria M, Del Cueto P, Fuentes L, Markle SL, NeMoyer A, et al.  
33 Barriers and strategies for implementing community-based interventions with minority  
34 elders: positive minds-strong bodies. *Implement Sci Commun*. 2020;1:41.  
35  
36  
37  
38  
39  
40 32. Schootemeijer S, van der Kolk NM, Ellis T, Mirelman A, Nieuwboer A, Nieuwhof  
41 F, et al. Barriers and Motivators to Engage in Exercise for Persons with Parkinson's  
42 Disease. *J Parkinsons Dis*. 2020;10(4):1293-9.  
43  
44  
45  
46  
47  
48 33. Pedersen MRL, Hansen AF, Elmoose-Osterlund K. Motives and Barriers Related  
49 to Physical Activity and Sport across Social Backgrounds: Implications for Health  
50 Promotion. *Int J Environ Res Public Health*. 2021;18(11).  
51  
52  
53  
54  
55  
56  
57  
58  
59  
60

- 1  
2  
3 34. Schubert MM, Clark A, De La Rosa AB. The Polar ® OH1 Optical Heart Rate  
4 Sensor is Valid during Moderate-Vigorous Exercise. Sports Med Int Open.  
5  
6 2018;2(3):E67-E70.  
7  
8  
9  
10 35. Hettiarachchi IT, Hanoun S, Nahavandi D, Nahavandi S. Validation of Polar OH1  
11 optical heart rate sensor for moderate and high intensity physical activities. PLoS One.  
12  
13 2019;14(5):e0217288.  
14  
15  
16  
17 36. Hermand E, Cassirame J, Ennequin G, Hue O. Validation of a  
18 Photoplethysmographic Heart Rate Monitor: Polar OH1. Int J Sports Med.  
19  
20 2019;40(7):462-7.  
21  
22  
23  
24  
25 37. Hamdani Y, Yee T, Oake M, McPherson AC. Multi-stakeholder perspectives on  
26 perceived wellness of Special Olympics athletes. Disabil Health J. 2019;12(3):422-30.  
27  
28  
29  
30 38. Kaveh MH, Ostovarfar J, Keshavarzi S, Ghahremani L. Validation of Perceived  
31 Wellness Survey (PWS) in a Sample of Iranian Population. Malays J Med Sci.  
32  
33 2016;23(4):46-53.  
34  
35  
36  
37 39. Sekiguchi Y, Curtis RM, Huggins RA, Benjamin CL, Walker AJ, Arent SM, et al.  
38 The Relationships Between Perceived Wellness, Sleep, and Acute: Chronic Training  
39 Load in National Collegiate Athletics Association Division I Male Soccer Players. J  
40  
41 Strength Cond Res. 2021;35(5):1326-30.  
42  
43  
44  
45 40. Teques P, Calmeiro L, Silva C, Borrego C. Validation and adaptation of the  
46 Physical Activity Enjoyment Scale (PACES) in fitness group exercisers. J Sport Health  
47  
48 Sci. 2020;9(4):352-7.  
49  
50  
51  
52  
53  
54  
55  
56  
57  
58  
59  
60

- 1  
2  
3 41. Murrock CJ, Bekhet A, Zauszniewski JA. Psychometric Evaluation of the  
4  
5 Physical Activity Enjoyment Scale in Adults with Functional Limitations. *Issues Ment*  
6  
7 *Health Nurs.* 2016;37(3):164-71.  
8  
9  
10  
11 42. Jekauc D, Voelkle M, Wagner MO, Mewes N, Woll A. Reliability, validity, and  
12  
13 measurement invariance of the German version of the physical activity enjoyment scale.  
14  
15 *J Pediatr Psychol.* 2013;38(1):104-15.  
16  
17  
18 43. Mullen SP, Olson EA, Phillips SM, Szabo AN, Wojcicki TR, Mailey EL, et al.  
19  
20 Measuring enjoyment of physical activity in older adults: invariance of the physical  
21  
22 activity enjoyment scale (paces) across groups and time. *Int J Behav Nutr Phys Act.*  
23  
24 2011;8:103.  
25  
26  
27  
28 44. Wan C, Tu X, Messing S, Li X, Yang Z, Zhao X, et al. Development and  
29  
30 validation of the general module of the system of quality of life instruments for chronic  
31  
32 diseases and its comparison with SF-36. *J Pain Symptom Manage.* 2011;42(1):93-104.  
33  
34  
35  
36 45. Knox SA, King MT. Validation and calibration of the SF-36 health transition  
37  
38 question against an external criterion of clinical change in health status. *Qual Life Res.*  
39  
40 2009;18(5):637-45.  
41  
42  
43  
44 46. Rotstein Z, Barak Y, Noy S, Achiron A. Quality of life in multiple sclerosis:  
45  
46 development and validation of the 'RAYS' scale and comparison with the SF-36. *Int J*  
47  
48 *Qual Health Care.* 2000;12(6):511-7.  
49  
50  
51 47. Anderson C, Laubscher S, Burns R. Validation of the Short Form 36 (SF-36)  
52  
53 health survey questionnaire among stroke patients. *Stroke.* 1996;27(10):1812-6.  
54  
55  
56  
57  
58  
59  
60

- 1  
2  
3 48. Farrar JT, Young JP, Jr., LaMoreaux L, Werth JL, Poole MR. Clinical importance  
4 of changes in chronic pain intensity measured on an 11-point numerical pain rating  
5  
6 of changes in chronic pain intensity measured on an 11-point numerical pain rating  
7  
8 scale. *Pain*. 2001;94(2):149-58.  
9
- 10 49. Turk DC, Rudy TE, Sorkin BA. Neglected topics in chronic pain treatment  
11  
12 outcome studies: determination of success. *Pain*. 1993;53(1):3-16.  
13  
14
- 15 50. Farrar JT, Troxel AB, Stott C, Duncombe P, Jensen MP. Validity, reliability, and  
16  
17 clinical importance of change in a 0-10 numeric rating scale measure of spasticity: a  
18  
19 post hoc analysis of a randomized, double-blind, placebo-controlled trial. *Clin Ther*.  
20  
21 2008;30(5):974-85.  
22  
23  
24
- 25 51. Morishita S, Tsubaki A, Hotta K, Kojima S, Sato D, Shirayama A, et al.  
26  
27 Relationship Between the Borg Scale Rating of Perceived Exertion and Leg-Muscle  
28  
29 Deoxygenation During Incremental Exercise in Healthy Adults. *Adv Exp Med Biol*.  
30  
31 2021;1269:95-9.  
32  
33  
34
- 35 52. Morishita S, Tsubaki A, Nashimoto S, Fu JB, Onishi H. Face scale rating of  
36  
37 perceived exertion during cardiopulmonary exercise test. *BMJ Open Sport Exerc Med*.  
38  
39 2018;4(1):e000474.  
40  
41  
42
- 43 53. Morishita S, Tsubaki A, Takabayashi T, Fu JB. Relationship between the rating of  
44  
45 perceived exertion scale and the load intensity of resistance training. *Strength Cond J*.  
46  
47 2018;40(2):94-109.  
48  
49
- 50 54. Compagnat M, Salle JY, Mandigout S, Lacroix J, Vuillerme N, Daviet JC. Rating  
51  
52 of perceived exertion with Borg scale in stroke over two common activities of the daily  
53  
54 living. *Top Stroke Rehabil*. 2018;25(2):145-9.  
55  
56  
57  
58  
59  
60

- 1  
2  
3 55. Penko AL, Barkley JE, Koop MM, Alberts JL. Borg scale is valid for ratings of  
4 perceived exertion for individuals with Parkinson's disease. *Int J Exerc Sci*.  
5  
6 2017;10(1):76-86.  
7  
8  
9  
10 56. Chung PK, Zhao Y, Liu JD, Quach B. A Brief Note on the Validity and Reliability  
11 of the Rating of Perceived Exertion Scale in Monitoring Exercise Intensity among  
12 Chinese Older Adults in Hong Kong. *Percept Mot Skills*. 2015;121(3):805-9.  
13  
14  
15  
16  
17 57. Abadie BR. Effect of viewing the RPE scale on the ability to make ratings of  
18 perceived exertion. *Percept Mot Skills*. 1996;83(1):317-8.  
19  
20  
21  
22  
23 58. Skinner JS, Hutsler R, Bergsteinova V, Buskirk ER. The validity and reliability of  
24 a rating scale of perceived exertion. *Med Sci Sports*. 1973;5(2):94-6.  
25  
26  
27  
28 59. Cash TF, Now PL, Grant JR. Why Do Women Exercise? Factor Analysis and  
29 Further Validation of the Reasons for Exercise Inventory. *Percept Mot Skills*.  
30  
31 1994;78(2):539-44.  
32  
33  
34  
35  
36  
37  
38  
39  
40  
41  
42  
43  
44  
45  
46  
47  
48  
49  
50  
51  
52  
53  
54  
55  
56  
57  
58  
59  
60

## Figure Legends

Figure 1: Study flow diagram.

Figure 2: Polar OH1 Heart Rate monitor. A. Picture of the monitor and charger. B. Proper placement of the monitor, with the device on the forearm. C. The Polar Beat app on a smart phone streams data in real time from the OH1 monitor via Bluetooth. D. After a session, data are retrievable from the Polar Coach website, where it is exported to a CSV file and processed in MATLAB.



1  
2  
3  
4  
5  
6  
7  
8  
9  
10  
11  
12  
13  
14  
15  
16  
17  
18  
19  
20  
21  
22  
23  
24  
25  
26  
27  
28  
29  
30  
31  
32  
33  
34  
35  
36  
37  
38  
39  
40  
41  
42  
43  
44  
45  
46  
47  
48  
49  
50  
51  
52  
53  
54  
55  
56  
57  
58  
59  
60

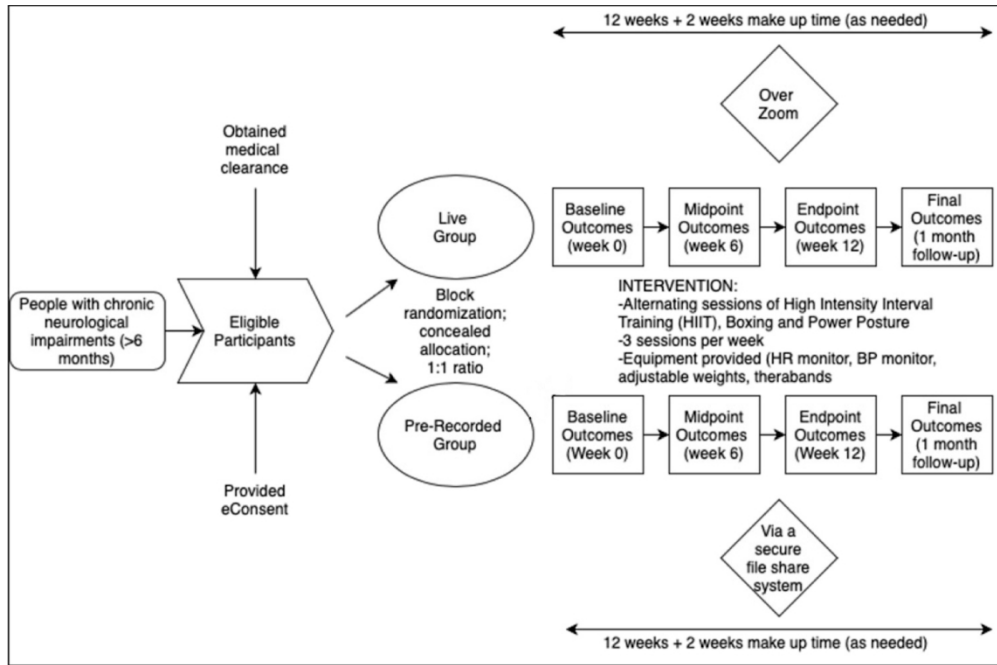

Study flow diagram.

254x168mm (300 x 300 DPI)

1  
2  
3  
4  
5  
6  
7  
8  
9  
10  
11  
12  
13  
14  
15  
16  
17  
18  
19  
20  
21  
22  
23  
24  
25  
26  
27  
28  
29  
30  
31  
32  
33  
34  
35  
36  
37  
38  
39  
40  
41  
42  
43  
44  
45  
46  
47  
48  
49  
50  
51  
52  
53  
54  
55  
56  
57  
58  
59  
60

**A**

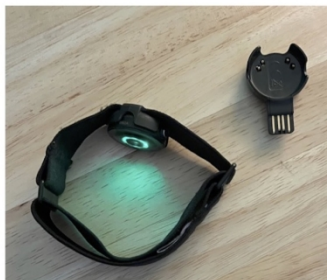

**B**

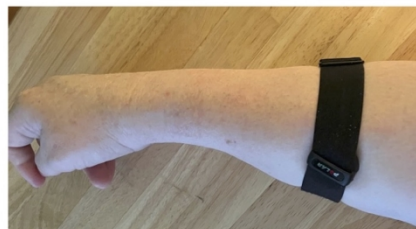

**C**

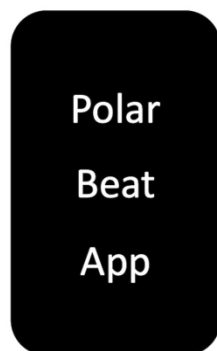

**D**

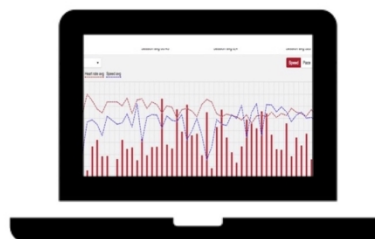

Polar OH1 Heart Rate monitor. A. Picture of the monitor and charger. B. Proper placement of the monitor, with the device on the forearm. C. The Polar Beat app on a smart phone streams data in real time from the OH1 monitor via Bluetooth. D. After a session, data are retrievable from the Polar Coach website, where it is exported to a CSV file and processed in MATLAB.

254x212mm (300 x 300 DPI)

# Informed Consent Form

This form explains our study and asks you to agree to participate. Please read the form carefully. A member of our study team will talk with you over Zoom to explain the study. Thank you so much for your interest in our study!

---

BIOMEDICAL RESEARCH ALLIANCE OF NEW YORK  
THE BURKE NEUROLOGICAL INSTITUTE

## SUBJECT INFORMATION AND INFORMED CONSENT

Project Title: Home-Based Exercise for People with Chronic Neurological Impairments  
Principal Investigator: Kathleen Friel, PhD  
Institution Name: Burke Neurological Institute  
Institution Address: 785 Mamaroneck Ave, White Plains, NY 10605  
Telephone: 914-368-3116, 646-351-9063 (24 hour)  
Protocol # TELEX

---

## ABOUT VOLUNTEERING FOR THIS RESEARCH STUDY

You are invited to participate in a research study. The purpose of the study is to determine the effect of a home-based exercise program on cardiovascular fitness and your quality of life. We will assess your motivation, enjoyment and compliance to either a live or pre recorded exercise class on Zoom.

You are eligible for this study because you have a neurological impairment that you've had for at least six months. A neurological impairment is weakness in your arms and/or legs that was caused by a stroke, brain injury, spinal cord injury, or any other condition that affects your brain or spinal cord.

---

## WHY IS THIS STUDY BEING DONE?

Scientists at The Burke Neurological Institute (BNI) are partnering with the Sabrina Cohen Foundation (SCF) to test whether a home-based exercise program can improve cardiovascular health and quality of life in people who have had a chronic neurological impairment. We designed this study after the onset of COVID-19 in the United States. Since COVID-19 limits accessibility to gyms and other types of exercise venues, we hope to learn and understand the physiological and behavioral aspects of this rehabilitation strategy to optimize wellness after a neurological injury. You were selected as a possible participant in this study because you've had a neurological impairment for at least six months.

---

## WHAT WILL I DO IF I AGREE TO BE IN THIS STUDY?

If you agree to be in the study, you will participate in 36 at-home, Zoom-based exercise classes. Classes will be held three times a week, for twelve weeks. You will be randomized to either a live class with other video participants, or a pre-recorded class that you will take on your own.

Before the first class, we will review your medical history with you to be sure it is safe for you to be in the study. If you qualify for the study, we will send you a kit that contains items you will need for the study, including a heart rate monitor, blood pressure cuff and adjustable wrist weights. We will also send you some surveys that ask about your ability to do everyday activities, such as dressing and cooking.

After you receive your home exercise kit, we will have an orientation Zoom class. You will meet the other people in the exercise class. During the orientation, the study team will teach you how to use the heart rate monitor. If you cannot put on the heart rate monitor, we will ask that a caregiver be present to assist you during each class.

You will download one applications onto your phone or computer that will allow us to access the information from your heart rate monitor. No one but the research team will be able to see this information aside from you.

Each exercise class will take approximately one hour. Each session will begin with instructions and questions from the study team regarding your pain level, level of motivation, and blood pressure. The exercise portion of the class will take 45 minutes. At the end of the class, the study team will ask you additional questions, such as how hard you worked, pain level, level of motivation and blood pressure.

The class instructor will tailor exercises to different abilities, so everyone can be active and safe. The entire class will be done in a seated position.

1 Approximately 100 people will be enrolled in the live class, and 100 in the pre-recorded class.  
2

3 After the 18th class, which is midway through the study, we will send you another set of the same surveys you  
4 completed before the first class. We will send you a third set of surveys after the final class.  
5

---

#### 6 RISKS AND INCONVENIENCES OF THE STUDY

7 Your participation in the project might involve the following risks:

8  
9 The largest risk in this study is the risk of fatigue and muscle aches. These symptoms are common with exercise. The  
10 instructor will offer modifications of each exercise, to offer easier or more difficult options. You will always be  
11 welcome to use a modification, request an additional modification, or rest.  
12

13 The risk of fall in this study is small, since you will be seated. If you normally have trouble with stability of your torso  
14 while you are seated, we will ask that a caregiver be present in case a fall occurs.  
15

16 There is a risk that your personal health information be disclosed in error. For this study, we are using secure Zoom  
17 settings from an academic medical center, and we will require a password for each class, to mitigate this risk. The  
18 app containing your heart rate information will also be secure.  
19

---

#### 20 PERMISSION FOR PHOTOGRAPHY

21 We will record each live class, video and audio. Since we are not together in one space, we need to record each  
22 class for purposes of data collection. Therefore, we require each participant to agree to being recorded. We want to  
23 make sure that you understand this.  
24

---

25 Do you agree to be photographed in this study?

Yes

No

---

29 Please initial here to confirm your choice about being  
30 photographed during the study:  
31  
32 \_\_\_\_\_  
33

---

#### 34 NEW INFORMATION

35 You will be told about any new significant findings developed during the course of the study that might affect your  
36 willingness to continue in the research.  
37

---

#### 38 COST OF STUDY TO PARTICIPANTS

39 There is no cost to you for participating in the research study.  
40

---

#### 41 BENEFITS OF THIS STUDY

42 Participation in this study is not guaranteed to benefit you. This study is only for the purpose of research. You may  
43 feel stronger by the end of the study, but there is no guarantee that this will occur. However, the information learned  
44 from this study may help other people in the future.  
45

---

#### 46 ALTERNATIVES TO STUDY PARTICIPATION

47 You do not have to participate in this research study to receive treatment for your condition. Your participation in  
48 this study is voluntary. If you decide to participate, you are free to discontinue participation at any time. Your  
49 participation in this study may be terminated without your consent by the study team or regulatory authorities, in  
50 certain circumstances, such as, if the investigator determines it is in your best interest, you cannot adhere to the  
51 study procedures, or in the event the study is terminated.  
52

---

#### 53 IN CASE OF INJURY

54 In accordance with Federal regulation, we are obligated to inform you about our policy in the event injury occurs. For  
55 medical emergencies, call 911. If, as a result of your participation, you experience injury from known or unknown  
56 risks of the research procedures as described, emergency medical care and treatment will be provided on our  
57 premises to the extent possible. We will assist you in obtaining additional medical care, as needed, but you will be  
58 responsible for the costs of such further medical treatment, either directly or through your medical insurance and/or  
59 other forms of medical coverage. No other compensation will be offered by or Burke Neurological Institute or the  
60 Biomedical Research Alliance of New York. Further information can be obtained from Dr Kathleen Friel (914  
368-3116). You are not waiving any legal right to seek additional compensation through the courts by signing this  
form.

## CONFIDENTIALITY

To the extent allowed by law, every effort will be made to keep your personal information confidential. However, information from this study will be submitted to the study sponsor and to the U.S. Food and Drug Administration. It may be submitted to governmental agencies in other countries where the study product may be considered for approval. Medical records, which identify you and the consent form signed by you, will be looked at by the sponsor or the sponsor's representatives and may be looked at by the FDA and other regulatory agencies, the Institutional Review Board, and the Biomedical Research Alliance of New York. While these parties are aware of the need to keep your information confidential, total confidentiality cannot be guaranteed. The results of this research project may be presented at meetings or in publications; however, you will not be identified in these presentations and/or publications.

Federal regulations give you certain rights related to your health information. These include the right to know who will be able to get the information and why they may be able to get it. The study doctor must get your authorization (permission) to use or give out any health information that might identify you. If you choose to be in this study, the study doctor will get personal information about you. This may include information that might identify you. The study doctor may also get information about your health, including:

- Past and present medical records
- Research records
- Records about phone calls made as part of this research
- Records about your study visits
- Information obtained during this research about laboratory test results
- Results from diagnostic and medical procedures including but not limited to X-rays, physical examinations and medical history
- Billing records

Information about your health may be used and given to others by the study doctor and staff. They might see the research information during and after the study. Your information may be given to the sponsor of this research. "Sponsor" includes any persons or companies that are working for or with the sponsor, or are owned by the sponsor. Information about you and your health which might identify you may be given to:

- The U.S. Food and Drug Administration
- Department of Health and Human Services agencies
- Governmental agencies in other countries
- Biomedical Research Alliance of New York (BRANY)
- The Institutional Review Board
- Accrediting agencies

Your personal health information may be further shared by the groups above. If shared by them, the information will no longer be covered by the U.S. federal privacy laws. However, these groups are committed to keeping your personal health information confidential. If you give permission to give your identifiable health information to a person or business, the information may no longer be protected. There is a risk that your information will be released to others without your permission.

Information about you and your health that might identify you may be given to others to carry out the research study. The sponsor will analyze and evaluate the results of the study. In addition, people from the sponsor and its consultants will be visiting the research site. They will follow how the study is done, and they will be reviewing your information for this purpose. The information may be given to the FDA. It may also be given to governmental agencies in other countries. This is done so the sponsor can receive marketing approval for new products resulting from this research. The information may also be used to meet the reporting requirements of governmental agencies.

This authorization does not have an expiration date. If you do not withdraw this authorization in writing, it will remain in effect indefinitely.

By signing this consent form, you are giving permission to use and give out the health information listed above for the purposes described above. You do not have to sign this consent form. If you choose not to sign this consent form, you will not be able to be in this research study. Your decision not to sign this consent form will not have any effect on your medical care and you will not lose any benefits or legal rights to which you are entitled. You have the right to review and copy your health information. However, if you decide to be in this study and sign this permission form, you may not be allowed to look at or copy your information until after the research is completed.

You may withdraw or take away your permission to use and disclose your health information at any time. You do this by sending written notice to the study doctor at the address on the front of this informed consent form. If you withdraw your permission, you will not be able to continue being in this study, but you will not have any penalty or loss of access to treatment or other benefits to which you are entitled. When you withdraw your permission, no new health information which might identify you will be gathered after that date. Information that has already been gathered may still be used and given to others. This would be done if it were necessary for the research to be reliable.

1 Notice Concerning HIV-Related Information: HIV-related information that either is collected as part of the research or  
2 that may already exist in your medical record might be accessed for the research by the research staff and the study  
3 sponsor, but will not be shared with others without your authorization, unless federal or state law requires the  
4 disclosure. You have a right to request a list of people who may receive or use your HIV-related information without  
5 authorization. If you experience discrimination because of the release or disclosure of HIV-related information, you  
6 may contact the New York State Division of Human Rights or New York City Commission on Human Rights. These  
7 agencies are responsible for protecting your rights.

---

#### 8 QUESTIONS ABOUT THIS STUDY

9 If you have any questions or requests for information relating to this research study or your participation in it, or if  
10 you want to voice a complaint or concern about this research, or if you have a study related injury, you may contact  
11 Dr. Friel at 914-368-3116, 646-351-9063 (24 hour).

12 If you have any questions about your rights as a research subject or complaints regarding this research study, or you  
13 are unable to reach the research staff, you may contact a person independent of the research team at the  
14 Biomedical Research Alliance of New York Institutional Review Board at 516-318-6877. Questions, concerns or  
15 complaints about research can also be registered with the Biomedical Research Alliance of New York Institutional  
16 Review Board at [www.branyirb.com/concerns-about-research](http://www.branyirb.com/concerns-about-research).

17 You will be given a copy of this form to keep.

18 A description of this clinical trial will be available on <http://www.ClinicalTrials.gov> as required by U.S. Law This Web  
19 site will not include information that can identify you. At most, the Web site will include a summary of the results.  
20 You can research this Web site at any time.

21 You are making a decision as to whether or not to participate. Your signature indicates that the above information  
22 has been reviewed with you and that you have decided to participate. You may withdraw at any time without  
23 prejudice after signing this form should you choose to discontinue participation in this study.

24 Signature:

25 \_\_\_\_\_

26 Date:

27 \_\_\_\_\_

28 Time:

29 \_\_\_\_\_

30 Upload a copy of informed consent here, if the  
31 participant chose to provide consent on paper

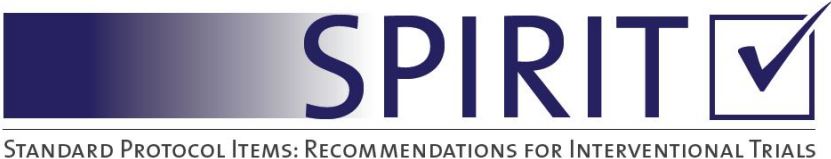

SPIRIT 2013 Checklist: Recommended items to address in a clinical trial protocol and related documents\*

| Section/item                      | Item No | Description                                                                                                                                                                                                                                                                              | Addressed on page number       |
|-----------------------------------|---------|------------------------------------------------------------------------------------------------------------------------------------------------------------------------------------------------------------------------------------------------------------------------------------------|--------------------------------|
| <b>Administrative information</b> |         |                                                                                                                                                                                                                                                                                          |                                |
| Title                             | 1       | Descriptive title identifying the study design, population, interventions, and, if applicable, trial acronym                                                                                                                                                                             | 1                              |
| Trial registration                | 2a      | Trial identifier and registry name. If not yet registered, name of intended registry                                                                                                                                                                                                     | 2                              |
|                                   | 2b      | All items from the World Health Organization Trial Registration Data Set                                                                                                                                                                                                                 | 1, 2, 3, 7, 8-10, 12-15-18, 20 |
| Protocol version                  | 3       | Date and version identifier                                                                                                                                                                                                                                                              | 2                              |
| Funding                           | 4       | Sources and types of financial, material, and other support                                                                                                                                                                                                                              | 2                              |
| Roles and responsibilities        | 5a      | Names, affiliations, and roles of protocol contributors                                                                                                                                                                                                                                  | 1, 19                          |
|                                   | 5b      | Name and contact information for the trial sponsor                                                                                                                                                                                                                                       | N/A                            |
|                                   | 5c      | Role of study sponsor and funders, if any, in study design; collection, management, analysis, and interpretation of data; writing of the report; and the decision to submit the report for publication, including whether they will have ultimate authority over any of these activities | 20                             |
|                                   | 5d      | Composition, roles, and responsibilities of the coordinating centre, steering committee, endpoint adjudication committee, data management team, and other individuals or groups overseeing the trial, if applicable (see Item 21a for data monitoring committee)                         | N/A                            |

1 **Introduction**

2

3 Background and rationale 6a Description of research question and justification for undertaking the trial, including summary of relevant studies (published and unpublished) examining benefits and harms for each intervention 4-5

4

5

6 6b Explanation for choice of comparators 4-5

7

8 Objectives 7 Specific objectives or hypotheses 5

9

10 Trial design 8 Description of trial design including type of trial (eg, parallel group, crossover, factorial, single group), allocation ratio, and framework (eg, superiority, equivalence, noninferiority, exploratory) 5-6

11

12

13

14 **Methods: Participants, interventions, and outcomes**

15

16 Study setting 9 Description of study settings (eg, community clinic, academic hospital) and list of countries where data will be collected. Reference to where list of study sites can be obtained 6

17

18

19 Eligibility criteria 10 Inclusion and exclusion criteria for participants. If applicable, eligibility criteria for study centres and individuals who will perform the interventions (eg, surgeons, psychotherapists) 6-7

20

21

22 Interventions 11a Interventions for each group with sufficient detail to allow replication, including how and when they will be administered 8-10

23

24

25 11b Criteria for discontinuing or modifying allocated interventions for a given trial participant (eg, drug dose change in response to harms, participant request, or improving/worsening disease) 11

26

27

28 11c Strategies to improve adherence to intervention protocols, and any procedures for monitoring adherence (eg, drug tablet return, laboratory tests) 11-12

29

30

31 11d Relevant concomitant care and interventions that are permitted or prohibited during the trial 6

32

33

34 Outcomes 12 Primary, secondary, and other outcomes, including the specific measurement variable (eg, systolic blood pressure), analysis metric (eg, change from baseline, final value, time to event), method of aggregation (eg, median, proportion), and time point for each outcome. Explanation of the clinical relevance of chosen efficacy and harm outcomes is strongly recommended 12-15

35

36

37

38

39

40 Participant timeline 13 Time schedule of enrolment, interventions (including any run-ins and washouts), assessments, and visits for participants. A schematic diagram is highly recommended (see Figure) 13 and Fig 1

41

42

43

44

45

46



|    |                                                                     |     |                                                                                                                                                                                                                                                                                                                                                                                                              |       |
|----|---------------------------------------------------------------------|-----|--------------------------------------------------------------------------------------------------------------------------------------------------------------------------------------------------------------------------------------------------------------------------------------------------------------------------------------------------------------------------------------------------------------|-------|
| 1  | Sample size                                                         | 14  | Estimated number of participants needed to achieve study objectives and how it was determined, including clinical and statistical assumptions supporting any sample size calculations                                                                                                                                                                                                                        | 7     |
| 2  |                                                                     |     |                                                                                                                                                                                                                                                                                                                                                                                                              |       |
| 3  |                                                                     |     |                                                                                                                                                                                                                                                                                                                                                                                                              |       |
| 4  | Recruitment                                                         | 15  | Strategies for achieving adequate participant enrolment to reach target sample size                                                                                                                                                                                                                                                                                                                          | 7     |
| 5  |                                                                     |     |                                                                                                                                                                                                                                                                                                                                                                                                              |       |
| 6  |                                                                     |     |                                                                                                                                                                                                                                                                                                                                                                                                              |       |
| 7  | <b>Methods: Assignment of interventions (for controlled trials)</b> |     |                                                                                                                                                                                                                                                                                                                                                                                                              |       |
| 8  | Allocation:                                                         |     |                                                                                                                                                                                                                                                                                                                                                                                                              |       |
| 9  |                                                                     |     |                                                                                                                                                                                                                                                                                                                                                                                                              |       |
| 10 | Sequence                                                            | 16a | Method of generating the allocation sequence (eg, computer-generated random numbers), and list of any factors for stratification. To reduce predictability of a random sequence, details of any planned restriction (eg, blocking) should be provided in a separate document that is unavailable to those who enrol participants or assign interventions                                                     | 8     |
| 11 | generation                                                          |     |                                                                                                                                                                                                                                                                                                                                                                                                              |       |
| 12 |                                                                     |     |                                                                                                                                                                                                                                                                                                                                                                                                              |       |
| 13 |                                                                     |     |                                                                                                                                                                                                                                                                                                                                                                                                              |       |
| 14 |                                                                     |     |                                                                                                                                                                                                                                                                                                                                                                                                              |       |
| 15 |                                                                     |     |                                                                                                                                                                                                                                                                                                                                                                                                              |       |
| 16 | Allocation                                                          | 16b | Mechanism of implementing the allocation sequence (eg, central telephone; sequentially numbered, opaque, sealed envelopes), describing any steps to conceal the sequence until interventions are assigned                                                                                                                                                                                                    | 8     |
| 17 | concealment                                                         |     |                                                                                                                                                                                                                                                                                                                                                                                                              |       |
| 18 | mechanism                                                           |     |                                                                                                                                                                                                                                                                                                                                                                                                              |       |
| 19 |                                                                     |     |                                                                                                                                                                                                                                                                                                                                                                                                              |       |
| 20 | Implementation                                                      | 16c | Who will generate the allocation sequence, who will enrol participants, and who will assign participants to interventions                                                                                                                                                                                                                                                                                    | 8     |
| 21 |                                                                     |     |                                                                                                                                                                                                                                                                                                                                                                                                              |       |
| 22 |                                                                     |     |                                                                                                                                                                                                                                                                                                                                                                                                              |       |
| 23 |                                                                     |     |                                                                                                                                                                                                                                                                                                                                                                                                              |       |
| 24 | Blinding (masking)                                                  | 17a | Who will be blinded after assignment to interventions (eg, trial participants, care providers, outcome assessors, data analysts), and how                                                                                                                                                                                                                                                                    | 9     |
| 25 |                                                                     |     |                                                                                                                                                                                                                                                                                                                                                                                                              |       |
| 26 |                                                                     |     |                                                                                                                                                                                                                                                                                                                                                                                                              |       |
| 27 |                                                                     | 17b | If blinded, circumstances under which unblinding is permissible, and procedure for revealing a participant's allocated intervention during the trial                                                                                                                                                                                                                                                         | 9     |
| 28 |                                                                     |     |                                                                                                                                                                                                                                                                                                                                                                                                              |       |
| 29 |                                                                     |     |                                                                                                                                                                                                                                                                                                                                                                                                              |       |
| 30 |                                                                     |     |                                                                                                                                                                                                                                                                                                                                                                                                              |       |
| 31 | <b>Methods: Data collection, management, and analysis</b>           |     |                                                                                                                                                                                                                                                                                                                                                                                                              |       |
| 32 |                                                                     |     |                                                                                                                                                                                                                                                                                                                                                                                                              |       |
| 33 | Data collection                                                     | 18a | Plans for assessment and collection of outcome, baseline, and other trial data, including any related processes to promote data quality (eg, duplicate measurements, training of assessors) and a description of study instruments (eg, questionnaires, laboratory tests) along with their reliability and validity, if known. Reference to where data collection forms can be found, if not in the protocol | 12-15 |
| 34 | methods                                                             |     |                                                                                                                                                                                                                                                                                                                                                                                                              |       |
| 35 |                                                                     |     |                                                                                                                                                                                                                                                                                                                                                                                                              |       |
| 36 |                                                                     |     |                                                                                                                                                                                                                                                                                                                                                                                                              |       |
| 37 |                                                                     |     |                                                                                                                                                                                                                                                                                                                                                                                                              |       |
| 38 |                                                                     |     |                                                                                                                                                                                                                                                                                                                                                                                                              |       |
| 39 |                                                                     | 18b | Plans to promote participant retention and complete follow-up, including list of any outcome data to be collected for participants who discontinue or deviate from intervention protocols                                                                                                                                                                                                                    | 11-12 |
| 40 |                                                                     |     |                                                                                                                                                                                                                                                                                                                                                                                                              |       |
| 41 |                                                                     |     |                                                                                                                                                                                                                                                                                                                                                                                                              |       |
| 42 |                                                                     |     |                                                                                                                                                                                                                                                                                                                                                                                                              |       |
| 43 |                                                                     |     |                                                                                                                                                                                                                                                                                                                                                                                                              |       |
| 44 |                                                                     |     |                                                                                                                                                                                                                                                                                                                                                                                                              |       |
| 45 |                                                                     |     |                                                                                                                                                                                                                                                                                                                                                                                                              |       |
| 46 |                                                                     |     |                                                                                                                                                                                                                                                                                                                                                                                                              |       |

|    |                                 |     |                                                                                                                                                                                                                                                                                                                                       |       |
|----|---------------------------------|-----|---------------------------------------------------------------------------------------------------------------------------------------------------------------------------------------------------------------------------------------------------------------------------------------------------------------------------------------|-------|
| 1  | Data management                 | 19  | Plans for data entry, coding, security, and storage, including any related processes to promote data quality (eg, double data entry; range checks for data values). Reference to where details of data management procedures can be found, if not in the protocol                                                                     | 17-18 |
| 2  |                                 |     |                                                                                                                                                                                                                                                                                                                                       |       |
| 3  |                                 |     |                                                                                                                                                                                                                                                                                                                                       |       |
| 4  |                                 |     |                                                                                                                                                                                                                                                                                                                                       |       |
| 5  | Statistical methods             | 20a | Statistical methods for analysing primary and secondary outcomes. Reference to where other details of the statistical analysis plan can be found, if not in the protocol                                                                                                                                                              | 15-17 |
| 6  |                                 |     |                                                                                                                                                                                                                                                                                                                                       |       |
| 7  |                                 |     |                                                                                                                                                                                                                                                                                                                                       |       |
| 8  |                                 | 20b | Methods for any additional analyses (eg, subgroup and adjusted analyses)                                                                                                                                                                                                                                                              | 15-17 |
| 9  |                                 |     |                                                                                                                                                                                                                                                                                                                                       |       |
| 10 |                                 | 20c | Definition of analysis population relating to protocol non-adherence (eg, as randomised analysis), and any statistical methods to handle missing data (eg, multiple imputation)                                                                                                                                                       | 18    |
| 11 |                                 |     |                                                                                                                                                                                                                                                                                                                                       |       |
| 12 |                                 |     |                                                                                                                                                                                                                                                                                                                                       |       |
| 13 |                                 |     |                                                                                                                                                                                                                                                                                                                                       |       |
| 14 | <b>Methods: Monitoring</b>      |     |                                                                                                                                                                                                                                                                                                                                       |       |
| 15 |                                 |     |                                                                                                                                                                                                                                                                                                                                       |       |
| 16 | Data monitoring                 | 21a | Composition of data monitoring committee (DMC); summary of its role and reporting structure; statement of whether it is independent from the sponsor and competing interests; and reference to where further details about its charter can be found, if not in the protocol. Alternatively, an explanation of why a DMC is not needed | 18    |
| 17 |                                 |     |                                                                                                                                                                                                                                                                                                                                       |       |
| 18 |                                 |     |                                                                                                                                                                                                                                                                                                                                       |       |
| 19 |                                 |     |                                                                                                                                                                                                                                                                                                                                       |       |
| 20 |                                 |     |                                                                                                                                                                                                                                                                                                                                       |       |
| 21 |                                 |     |                                                                                                                                                                                                                                                                                                                                       |       |
| 22 |                                 | 21b | Description of any interim analyses and stopping guidelines, including who will have access to these interim results and make the final decision to terminate the trial                                                                                                                                                               | 18    |
| 23 |                                 |     |                                                                                                                                                                                                                                                                                                                                       |       |
| 24 |                                 |     |                                                                                                                                                                                                                                                                                                                                       |       |
| 25 | Harms                           | 22  | Plans for collecting, assessing, reporting, and managing solicited and spontaneously reported adverse events and other unintended effects of trial interventions or trial conduct                                                                                                                                                     | 18    |
| 26 |                                 |     |                                                                                                                                                                                                                                                                                                                                       |       |
| 27 |                                 |     |                                                                                                                                                                                                                                                                                                                                       |       |
| 28 |                                 | 23  | Frequency and procedures for auditing trial conduct, if any, and whether the process will be independent from investigators and the sponsor                                                                                                                                                                                           | 18    |
| 29 |                                 |     |                                                                                                                                                                                                                                                                                                                                       |       |
| 30 |                                 |     |                                                                                                                                                                                                                                                                                                                                       |       |
| 31 |                                 |     |                                                                                                                                                                                                                                                                                                                                       |       |
| 32 | <b>Ethics and dissemination</b> |     |                                                                                                                                                                                                                                                                                                                                       |       |
| 33 |                                 |     |                                                                                                                                                                                                                                                                                                                                       |       |
| 34 | Research ethics approval        | 24  | Plans for seeking research ethics committee/institutional review board (REC/IRB) approval                                                                                                                                                                                                                                             | 19    |
| 35 |                                 |     |                                                                                                                                                                                                                                                                                                                                       |       |
| 36 |                                 |     |                                                                                                                                                                                                                                                                                                                                       |       |
| 37 | Protocol amendments             | 25  | Plans for communicating important protocol modifications (eg, changes to eligibility criteria, outcomes, analyses) to relevant parties (eg, investigators, REC/IRBs, trial participants, trial registries, journals, regulators)                                                                                                      | 19    |
| 38 |                                 |     |                                                                                                                                                                                                                                                                                                                                       |       |
| 39 |                                 |     |                                                                                                                                                                                                                                                                                                                                       |       |
| 40 |                                 |     |                                                                                                                                                                                                                                                                                                                                       |       |
| 41 |                                 |     |                                                                                                                                                                                                                                                                                                                                       |       |
| 42 |                                 |     |                                                                                                                                                                                                                                                                                                                                       |       |

|    |                               |     |                                                                                                                                                                                                                                                                                     |                                                                                                    |
|----|-------------------------------|-----|-------------------------------------------------------------------------------------------------------------------------------------------------------------------------------------------------------------------------------------------------------------------------------------|----------------------------------------------------------------------------------------------------|
| 1  | Consent or assent             | 26a | Who will obtain informed consent or assent from potential trial participants or authorised surrogates, and how (see Item 32)                                                                                                                                                        | 10-11                                                                                              |
| 2  |                               |     |                                                                                                                                                                                                                                                                                     |                                                                                                    |
| 3  |                               |     |                                                                                                                                                                                                                                                                                     |                                                                                                    |
| 4  |                               | 26b | Additional consent provisions for collection and use of participant data and biological specimens in ancillary studies, if applicable                                                                                                                                               | N/A                                                                                                |
| 5  |                               |     |                                                                                                                                                                                                                                                                                     |                                                                                                    |
| 6  |                               |     |                                                                                                                                                                                                                                                                                     |                                                                                                    |
| 7  | Confidentiality               | 27  | How personal information about potential and enrolled participants will be collected, shared, and maintained in order to protect confidentiality before, during, and after the trial                                                                                                | 17-18                                                                                              |
| 8  |                               |     |                                                                                                                                                                                                                                                                                     |                                                                                                    |
| 9  |                               |     |                                                                                                                                                                                                                                                                                     |                                                                                                    |
| 10 | Declaration of interests      | 28  | Financial and other competing interests for principal investigators for the overall trial and each study site                                                                                                                                                                       | 20                                                                                                 |
| 11 |                               |     |                                                                                                                                                                                                                                                                                     |                                                                                                    |
| 12 |                               |     |                                                                                                                                                                                                                                                                                     |                                                                                                    |
| 13 | Access to data                | 29  | Statement of who will have access to the final trial dataset, and disclosure of contractual agreements that limit such access for investigators                                                                                                                                     | 17                                                                                                 |
| 14 |                               |     |                                                                                                                                                                                                                                                                                     |                                                                                                    |
| 15 |                               |     |                                                                                                                                                                                                                                                                                     |                                                                                                    |
| 16 | Ancillary and post-trial care | 30  | Provisions, if any, for ancillary and post-trial care, and for compensation to those who suffer harm from trial participation                                                                                                                                                       | no plans for post-trial care, compensation plan due to injury listed in ICF p2 "In Case of Injury" |
| 17 |                               |     |                                                                                                                                                                                                                                                                                     |                                                                                                    |
| 18 |                               |     |                                                                                                                                                                                                                                                                                     |                                                                                                    |
| 19 |                               |     |                                                                                                                                                                                                                                                                                     |                                                                                                    |
| 20 |                               |     |                                                                                                                                                                                                                                                                                     |                                                                                                    |
| 21 |                               |     |                                                                                                                                                                                                                                                                                     |                                                                                                    |
| 22 |                               |     |                                                                                                                                                                                                                                                                                     |                                                                                                    |
| 23 |                               |     |                                                                                                                                                                                                                                                                                     |                                                                                                    |
| 24 |                               |     |                                                                                                                                                                                                                                                                                     |                                                                                                    |
| 25 | Dissemination policy          | 31a | Plans for investigators and sponsor to communicate trial results to participants, healthcare professionals, the public, and other relevant groups (eg, via publication, reporting in results databases, or other data sharing arrangements), including any publication restrictions | 19                                                                                                 |
| 26 |                               |     |                                                                                                                                                                                                                                                                                     |                                                                                                    |
| 27 |                               |     |                                                                                                                                                                                                                                                                                     |                                                                                                    |
| 28 |                               |     |                                                                                                                                                                                                                                                                                     |                                                                                                    |
| 29 |                               | 31b | Authorship eligibility guidelines and any intended use of professional writers                                                                                                                                                                                                      | 19                                                                                                 |
| 30 |                               |     |                                                                                                                                                                                                                                                                                     |                                                                                                    |
| 31 |                               | 31c | Plans, if any, for granting public access to the full protocol, participant-level dataset, and statistical code                                                                                                                                                                     | 19                                                                                                 |
| 32 |                               |     |                                                                                                                                                                                                                                                                                     |                                                                                                    |
| 33 |                               |     |                                                                                                                                                                                                                                                                                     |                                                                                                    |
| 34 | <b>Appendices</b>             |     |                                                                                                                                                                                                                                                                                     |                                                                                                    |
| 35 |                               |     |                                                                                                                                                                                                                                                                                     |                                                                                                    |
| 36 | Informed consent materials    | 32  | Model consent form and other related documentation given to participants and authorised surrogates                                                                                                                                                                                  | supplemental                                                                                       |
| 37 |                               |     |                                                                                                                                                                                                                                                                                     |                                                                                                    |
| 38 |                               |     |                                                                                                                                                                                                                                                                                     |                                                                                                    |
| 39 | Biological specimens          | 33  | Plans for collection, laboratory evaluation, and storage of biological specimens for genetic or molecular analysis in the current trial and for future use in ancillary studies, if applicable                                                                                      | N/A                                                                                                |
| 40 |                               |     |                                                                                                                                                                                                                                                                                     |                                                                                                    |
| 41 |                               |     |                                                                                                                                                                                                                                                                                     |                                                                                                    |
| 42 |                               |     |                                                                                                                                                                                                                                                                                     |                                                                                                    |

1 \*It is strongly recommended that this checklist be read in conjunction with the SPIRIT 2013 Explanation & Elaboration for important clarification on the items.  
2 Amendments to the protocol should be tracked and dated. The SPIRIT checklist is copyrighted by the SPIRIT Group under the Creative Commons  
3 [“Attribution-NonCommercial-NoDerivs 3.0 Unported”](#) license.  
4  
5  
6  
7  
8  
9  
10  
11  
12  
13  
14  
15  
16  
17  
18  
19  
20  
21  
22  
23  
24  
25  
26  
27  
28  
29  
30  
31  
32  
33  
34  
35  
36  
37  
38  
39  
40  
41  
42  
43  
44  
45  
46

For peer review only

# BMJ Open

## Effects of a 12-week, seated virtual home-based tele-exercise program compared with a pre-recorded video-based exercise program in people with chronic neurological impairments: protocol for a randomized control trial (RCT)

|                                 |                                                                                                                                                                                                                                                                                                                                                                          |
|---------------------------------|--------------------------------------------------------------------------------------------------------------------------------------------------------------------------------------------------------------------------------------------------------------------------------------------------------------------------------------------------------------------------|
| Journal:                        | <i>BMJ Open</i>                                                                                                                                                                                                                                                                                                                                                          |
| Manuscript ID                   | bmjopen-2022-065032.R1                                                                                                                                                                                                                                                                                                                                                   |
| Article Type:                   | Protocol                                                                                                                                                                                                                                                                                                                                                                 |
| Date Submitted by the Author:   | 14-Nov-2022                                                                                                                                                                                                                                                                                                                                                              |
| Complete List of Authors:       | Divecha, Ayushi A.; Burke Neurological Institute<br>Bialek, Amy; Burke Neurological Institute<br>Kumar, Devina S.; Burke Neurological Institute<br>Garn, Rachel; Burke Neurological Institute<br>Currie, Lydia; Burke Neurological Institute<br>Campos, Talita; Burke Neurological Institute<br>Friel, Kathleen M.; Burke Neurological Institute; Weill Cornell Medicine |
| <b>Primary Subject Heading</b>: | Sports and exercise medicine                                                                                                                                                                                                                                                                                                                                             |
| Secondary Subject Heading:      | Rehabilitation medicine                                                                                                                                                                                                                                                                                                                                                  |
| Keywords:                       | Rehabilitation medicine < INTERNAL MEDICINE, Neurology < INTERNAL MEDICINE, Telemedicine < BIOTECHNOLOGY & BIOINFORMATICS                                                                                                                                                                                                                                                |
|                                 |                                                                                                                                                                                                                                                                                                                                                                          |

SCHOLARONE™  
Manuscripts

1  
2  
3 Effects of a 12-week, seated virtual home-based tele-exercise program compared with a  
4  
5 pre-recorded video-based exercise program in people with chronic neurological  
6  
7 impairments: protocol for a randomized control trial (RCT)  
8  
9  
10  
11  
12

13 Ayushi A. Divecha<sup>1</sup>, Amy Bialek<sup>1</sup>, Devina S. Kumar<sup>1</sup>, Rachel M. Garn<sup>1</sup>, Lydia E. J.  
14  
15 Currie<sup>1</sup>, Talita Campos<sup>1</sup>, Kathleen M. Friel<sup>1,2</sup>  
16  
17  
18  
19  
20

21 <sup>1</sup>Burke Neurological Institute, White Plains, NY and <sup>2</sup>Weill Cornell Medicine, New York,  
22  
23 NY, USA  
24  
25  
26  
27  
28

29 Address All Scientific and Public Correspondence to:

30  
31 Kathleen M. Friel, PhD  
32  
33

34 Clinical Laboratory for Early Brain Injury Recovery,  
35  
36

37 Burke Neurological Institute, White Plains, NY and  
38  
39

40 Weill Cornell Medicine, New York, NY, USA  
41  
42

43 Phone Number 914-368-3116  
44  
45

46 [kaf3001@med.cornell.edu](mailto:kaf3001@med.cornell.edu)  
47  
48

49 Word count: 4676  
50  
51

52 Keywords: Tele-exercise, chronic neurological impairments, home-based, virtual  
53  
54 training.  
55  
56  
57  
58  
59  
60

## Abstract

**Introduction:** Exercise is vital to staying well and preventing secondary complications in people with Chronic Neurological Impairments (CNI). Appropriate exercise is often inaccessible to this population. The purpose of the study is to investigate the effects of a seated virtual exercise program on heart rate, recovery, fatigue, pain, motivation, enjoyment, and quality of life in people with CNI. **Methods and Analysis:** Individuals with CNI will be screened for eligibility, and 60 participants will be randomized 1:1 into either a live or pre-recorded group. There is no geographic limitation to where participants reside, since participation is virtual. The study will be coordinated by one site in White Plains, NY, USA. The live group will exercise with an instructor via Zoom while the pre-recorded group will exercise at their chosen time using pre-recorded videos, 3x/week for 12 weeks. Primary outcome measure: change in heart rate during exercise/recovery. Secondary outcome measures: fatigue, motivation, level of pain and exertion, physical well-being, enjoyment of physical activity, motivation, and quality of life. Outcomes will be assessed at baseline, midpoint, end of study, and one-month post-study. Adverse events, medication changes, and physical activity will be tracked throughout. Within-group and between-group comparisons will be performed using Analysis of Covariance and regression. **Ethics and Dissemination:** BRANY IRB approval: 09/22/2020. All participants will provide written informed consent. Results will be disseminated through presentations, publications, and [clinicaltrials.gov](https://clinicaltrials.gov). Trial registration number: [ClinicalTrials.gov](https://clinicaltrials.gov), NCT04564495.

## Strengths and Limitations of This Study

1. This study will use a comprehensive set of physiological and behavioral assessments to assess effects of exercise.
2. The virtual design of the study enables people to participate without commuting to our institute.
3. For those participants with limited technological experience, difficulty using blood pressure devices and heart rate monitors will cause missing data values.
4. The virtual design of the study prohibits hands-on evaluations.



## Introduction

Exercise is a vital component to staying well and preventing secondary impairments. Exercise is known to positively influence a range of factors including cardiovascular health, cognition, mental health, bone health, sleep, and quality of life, among many others<sup>1-8</sup>. The benefits of exercise are further amplified in the estimated one billion people worldwide with Chronic (> 6 months) Neurological Impairments (CNI), as the injuries often lead to sedentary lifestyles and thus higher rates of obesity and cardiovascular disease<sup>9-11</sup>. Incorporating an exercise regimen is vital to preventing secondary complications such as muscular weakness, fatigue, limited mobility, pain, spasticity, bone loss, and increased risk of fractures, falls, diabetes, depression, and obesity<sup>7, 8, 12, 13</sup>. Exercise can be neuroprotective and neuro-regenerative by increasing neurotrophic factors, which are involved in neuroprotection, neuroplasticity, and maintenance of neuronal health<sup>2, 14-18</sup>. Exercise can also improve muscle strength and bone integrity in people with CNI<sup>19-21</sup>.

People with CNI often cannot access community exercise centers, as mobility can be more difficult, insurance payments sparse, centers not welcoming or accessible, and assistive exercise equipment too costly for most facilities<sup>22-35</sup>.

Another key barrier to exercise for people with CNI is transportation<sup>36</sup>. Although COVID-19 introduced many new barriers to community participation, it also had some silver linings for people with CNI. COVID-19 resulted in the emergence of many new Zoom or online classes tailored to people with CNI, which removed the barrier of transportation.

Although there has been an explosion of virtual-based exercise opportunities since 2020, much is unknown regarding optimal delivery models to bring exercise to people

1  
2  
3 with CNI. Two general types of virtual exercise delivery models exist. In synchronous  
4 exercise, one or more participants join a virtual space via videoconferencing, and  
5 interact with the trainer in real time. Synchronous exercise enables the trainer to provide  
6 feedback as participants exercise. In contrast, in asynchronous exercise, trainers record  
7 instructional videos, which participants complete on their own time, without being in the  
8 same virtual space with the trainer at the same time. Asynchronous exercise provides  
9 scheduling flexibility to participants but does not allow for real time interaction and  
10 feedback from the trainer. There has only been one study directly comparing  
11 synchronous versus asynchronous exercise training in people with CNI.  
12  
13  
14  
15  
16  
17  
18  
19  
20  
21  
22  
23

24 In a recent study, forty adults with spinal cord injury were randomized to either  
25 synchronous or asynchronous tele-exercise. While there was no significant difference in  
26 average daily workload between the interventions, the synchronous tele-exercise found  
27 significantly higher values for adherence and successful data recording of the exercise,  
28 resulting in greater weekly training loads<sup>37</sup>. Virtual exercise platforms are part of society  
29 even as the pandemic wanes. Thus, it is important to determine optimal delivery models  
30 for specific groups of participants.  
31  
32  
33  
34  
35  
36  
37  
38  
39  
40

41 This study will examine the cardiovascular benefits, as well as differences in  
42 compliance, motivation and feelings of socialization and exertion between synchronous  
43 and asynchronous classes. The classes will be held for 12 weeks, 3 times/week using  
44 seated exercise via Zoom. The instructor will remain the same and alternate between  
45 boxing, high intensity interval training (HIIT) and power posture classes. We will  
46 examine the potential benefits of an accessible form of exercise for a population that is  
47  
48  
49  
50  
51  
52  
53  
54  
55  
56  
57  
58  
59  
60

1  
2  
3 in urgent need. Additionally, by comparing synchronous and asynchronous classes, we  
4  
5 will compare user compliance, motivation, enjoyment, and socialization.  
6  
7

8 We hypothesize that individuals in the synchronous class will have better attendance,  
9  
10 more robust exertion as measured by heart rate, and better enjoyment than people in  
11  
12 the asynchronous class, due to the social component of the synchronous classes. We  
13  
14 hypothesize that participants in both groups will show improvement in heart rate  
15  
16 recovery, physical wellness, quality of life, enjoyment, and motivation/engagement, and  
17  
18 that changes will be greater in the synchronous class due to consistent supervision and  
19  
20 contact.  
21  
22  
23  
24  
25  
26  
27

## 28 **Methods and Analysis**

### 29 **Study Design**

30  
31  
32  
33 This study is a parallel randomized controlled trial to investigate the effects of a 12-  
34  
35 week, 3 times/week, seated tele-exercise program for adults with CNI (Figure 1). All 36  
36  
37 exercise sessions will be completed online via Zoom with the physical exercise  
38  
39 instructor (live, synchronous group) or offline using recorded videos (pre-recorded,  
40  
41 asynchronous group). Participants will be in their own homes as they complete the  
42  
43 exercise classes. Participants can continue their medications, physical, occupational,  
44  
45 speech therapies, and existing exercise routines (2 times/week or fewer).  
46  
47  
48  
49  
50  
51  
52

### 53 **Eligibility Criteria and Participants**

54  
55 The eligibility criteria will be kept broad to accommodate all neurological impairments.  
56  
57  
58  
59  
60

### Inclusion Criteria:

1. Participants diagnosed with Chronic (>6 months) Neurological Impairments
2. Ages 18 to 75 years
3. Able to sit for at least 1 hour
4. Stable Heart rate (HR) and Blood Pressure (BP)
5. Medical clearance to participate in moderate intensity exercises
6. Can don and doff a wrist HR monitor with or without assistance
7. Can maintain daily exercise and physical activity during the study
8. No other neurological, medical or cognitive impairments
9. Able to access the internet and use the cloud-based Zoom conference platform
10. Ability to speak and understand English
11. Currently exercising 2 days or less per week
12. Presence of caregiver or supervisor during exercise, for safety

### Exclusion Criteria:

1. Unstable or uncontrolled medical conditions
2. Medical issues preventing safe participation
3. Unable to follow simple 2-step commands

### Number of Participants

We plan to conduct multiple cohorts of participants, each with different participant populations, e.g., multiple sclerosis, cerebral palsy, stroke, spinal cord injury.

1  
2  
3 For each cohort, with 27 participants in the synchronous and asynchronous groups, we  
4 will have 80% power to detect a change in maximum heart rate during exercise from  
5 about 80 bpm to 100 bpm (or greater), from the first session to the last session of the  
6 intervention. This calculation assumes a conservative standard deviation of the pre/post  
7 differences in heart rate of 35 bpm. We plan for a 30% dropout rate, which is an  
8 estimate based on our feasibility pilot study (see below), which means that we will  
9 recruit 35 participants per group to achieve 80% power.  
10  
11  
12  
13  
14  
15  
16  
17  
18  
19  
20  
21

## 22 **Recruitment**

23  
24  
25 Participants will be recruited via the Sabrina Cohen Foundation, which has a network of  
26 people with CNI, and by the Burke Neurological Institute, who has a database of  
27 potential participants from prior studies or programs. We will also post our recruitment  
28 flier on our website, social media, and will mail it to neurological patient advocacy  
29 groups. If we cannot recruit appropriate numbers using these methods, we will pursue  
30 paid advertising in our community.  
31  
32  
33  
34  
35  
36  
37  
38  
39  
40  
41

## 42 **Randomization**

43  
44  
45 A person not affiliated with the study will generate a series of permuted randomized  
46 blocks in a computerized spreadsheet with a defined block size of 4. Participants will be  
47 allocated to either the live (synchronous) or pre-recorded (asynchronous) group, with a  
48 1:1 ratio between groups. Due to the nature of the intervention, it is not possible to  
49  
50  
51  
52  
53  
54  
55  
56  
57  
58  
59  
60

1  
2  
3 conceal allocation from the participants or the study team. However, the two groups will  
4  
5 never interact with one another.  
6  
7  
8  
9

## 10 11 **Blinding and Rigor of Data** 12

13  
14 Due to the nature of the study, blinding of participants and study team members to  
15  
16 group allocation will not be possible. All participants will complete the outcome surveys  
17  
18 directly online, without input or assistance from the study team. Heart rate data will be  
19  
20 collected through a heart rate monitor that collects quantitative data without input or  
21  
22 filtering by the study team.  
23  
24  
25  
26  
27

## 28 29 **Intervention** 30

31  
32 The exercise intervention will be delivered by a trained professional who specializes in  
33  
34 adaptive exercise for individuals with CNI. The instructor will structure each class to  
35  
36 ensure standardization in terms of class structure, including warm-up, cool-down, cues  
37  
38 for recording heart rate during class, use of additional equipment, and adherence to the  
39  
40 general study protocol. The instructor has extensive experience in offering adaptations  
41  
42 to exercises in a virtual setting. He offers alternative ways to perform the exercises,  
43  
44 such that everyone in class will be able to fully participate safely.  
45  
46  
47

48  
49 All participants, regardless of allocation to live or pre-recorded groups, will participate in  
50  
51 45 minutes of aerobic exercise intervention, three times a week, for a period of 12  
52  
53 weeks. The overall exercise session will be up to one hour long to include measuring  
54  
55 vitals, answering questions before/after sessions, and rest breaks (if any). Two  
56  
57  
58  
59

additional weeks will be provided for making up missed sessions, if applicable. Each intervention will be preceded by a warm-up and followed by a cool-down period. All participants will be asked to document any adverse events and changes in medications before each session. The order of classes will be rotated. Individual aerobic interventions for the first cohort are described below and summarized in Table 1.

Table 1: Summary of Exercise Sessions

| Minutes into Session | HIIT                                                                  | Boxing                                                                       | Power Posture                                 |
|----------------------|-----------------------------------------------------------------------|------------------------------------------------------------------------------|-----------------------------------------------|
| 5                    | Warm up                                                               | Warm up                                                                      | Warm up                                       |
| 10                   | Intervals of 30 sec high intensity movements, 1-2 min lower intensity | Intervals of 30 sec high intensity boxing movements, 1-2 min lower intensity | Stretching                                    |
| 15                   |                                                                       |                                                                              | Fast paced movements targeting trunk, posture |
| 20                   |                                                                       |                                                                              | Stretching                                    |
| 25                   |                                                                       |                                                                              |                                               |
| 30                   |                                                                       |                                                                              |                                               |
| 35                   | Cool down                                                             | Cool down                                                                    | Cool down                                     |
| 40                   |                                                                       |                                                                              |                                               |
| 45                   | End                                                                   | End                                                                          | End                                           |

High intensity interval training (HIIT): In HIIT sessions, participants will do repetitive bouts of high intensity exercises, with intermittent periods of rest or active recovery. Examples of high intensity movements used in these sessions include fast punching movements, repeatedly rapidly lifting one's arms overhead (with or without weights, as tolerated by each participant), and abdominal crunches. The duration of each bout of high intensity is about 10-30 seconds. Since this study will include participants with variable neurological impairments, the upper limit of exercise intensity in HIIT will be

1  
2  
3 dependent on instructor's judgement, participant feedback, rate of perceived exertion,  
4  
5 and any exercise heart rate restrictions given by their doctor in the medical screening.  
6  
7

8 Boxing: In boxing sessions, participants will do a circuit of individual and combinations  
9  
10 of various arm strikes and punches. Boxing is a moderate to high intensity aerobic  
11  
12 activity by nature. During the session, participants will do bouts of high intensity  
13  
14 movements, similar to HIIT, along with periods of lower intensity arm movements such  
15  
16 as practicing defensive blocks of punches from an imaginary boxing opponent. The  
17  
18 exercise intensity for boxing, as in HIIT, will be subjective for participants based on level  
19  
20 of perceived exertion as well as exercise heart rate restrictions, if any.  
21  
22  
23

24 Power posture: Power posture is a HIIT-style strength and endurance class in which  
25  
26 participants will move in ways that train trunk stability and control of sitting with correct  
27  
28 posture. In these sessions, there will be a warm-up period of 5-10 minutes, focused on  
29  
30 slow, gentle repetitions to prepare the trapezius and other supporting scapular muscles  
31  
32 for movement. This workout will target postural form, with fast paced targeted  
33  
34 movements for 10-15 minutes. After the fast paced movements, a cool-down period will  
35  
36 focus on gentle deep neck flexor/extensor chin tuck exercises, range of motion, and  
37  
38 stretching.  
39  
40  
41  
42  
43  
44  
45

## 46 **Virtual Nature of the Study**

47  
48  
49 Each aspect of this study will be performed virtually. Screenings will be performed on  
50  
51 the telephone, with a standard list of criteria asked of each person. If deemed eligible,  
52  
53 the potential participant will be sent a Zoom link to go through the informed consent on  
54  
55  
56  
57  
58  
59  
60



1  
2  
3 a one-to-one basis. The informed consent will be uploaded to REDCap, a secure web  
4 application for building and managing online surveys and databases. REDCap is 21  
5 CFR Part 11-ready and HIPAA compliant and is specifically geared to support online  
6 and offline data capture for research studies and operations.  
7  
8  
9  
10

11  
12 To obtain informed consent directly from participants, a study team member will arrange  
13 a Zoom call with each participant. The informed consent will be signed virtually by  
14 sharing a virtual remote with the participant during the call. If anyone has difficulty, they  
15 can be sent the informed consent from REDCap via email and return it to REDCap just  
16 as easily. Each participant will be sent a copy of their signed consent form via the same  
17 REDCap email system (see Supplemental Material for a sample consent form).  
18  
19  
20  
21  
22  
23  
24  
25

26  
27 Each participant will be mailed a home exercise kit, which will contain a Polar optical  
28 heart rate monitor (OH1), blood pressure monitor, yellow and green resistance  
29 TheraBands and wrist weights.  
30  
31  
32  
33

34 After the home kits have been received by the participants and before the intervention  
35 begins, we will hold a series of training videoconferencing calls to acquaint participants  
36 with the study procedures and the use of all devices.  
37  
38  
39  
40  
41

42 *Polar OH1 heart rate monitor:* we will train participants in donning/doffing the heart rate  
43 monitor, using the Polar app, using their Polar accounts, syncing the Polar devices with  
44 their smartphones and starting/ending their heart rate tracking during exercise sessions.  
45  
46  
47  
48

49 *Blood pressure monitor:* we will send each participant a commercially available  
50 automatic blood pressure (BP) monitor. We will train each person to use it, and we have  
51  
52  
53  
54  
55  
56  
57  
58  
59  
60

1  
2  
3 embedded an instructional video into the REDCap data entry form on which participants  
4  
5 will input their BP.  
6  
7

8 *Checking compliance:* after each session, a study team member will review each  
9  
10 participant's data entry forms and syncing of their heart rate data with the Polar app.  
11  
12 For the synchronous group, this will occur before the participant leaves the session. For  
13  
14 the asynchronous group, this will occur within one day of when the participant  
15  
16 completes the session.  
17  
18

19  
20 All questionnaires and questions to be answered before and after each class will be  
21  
22 sent from and stored on REDCap. All heart rate data will be transmitted to the Polar  
23  
24 website, which can be accessed only by the participant or the researchers. Then, the  
25  
26 data will be analyzed in MATLAB using custom scripts written by the study team.  
27  
28  
29  
30  
31

### 32 **Study Safety**

33  
34  
35 We will monitor side effects before and after each session by having participants  
36  
37 complete surveys on REDCap. If pain or blood pressure are higher than usual, we will  
38  
39 ask the participant if they wish to continue. If blood pressure rises near limitations  
40  
41 prescribed by a participant's doctor, we will discontinue the participant. If any injury  
42  
43 occurs during or outside of study sessions that may increase the risk of further injury,  
44  
45 we will discontinue the participant.  
46  
47  
48  
49  
50  
51

### 52 **Patient and Public Involvement**

53  
54  
55  
56  
57  
58  
59  
60

1  
2  
3 Persons with disabilities were involved in the design of this study, and will be involved in  
4 the conduct, reporting, and dissemination plans of this research.  
5  
6  
7  
8  
9

### 10 **Strategies to improve adherence**

11  
12  
13 In this study, adherence is defined as the number of sessions a participant completed.  
14

15  
16 The study team will take attendance at each synchronous session and will monitor  
17 session completions for the asynchronous group. Completion for the asynchronous  
18 group will be monitored via REDCap. Each time a person completes a data entry form  
19 before and after the session, it will be automatically saved and time stamped in  
20 REDCap.  
21  
22  
23  
24  
25  
26

27  
28 If a participant misses a class, we will reach out and inquire about their ability to attend  
29 future sessions. We have *a priori* set a minimum number of 30 of 36 classes that a  
30 participant must attend to be included in the main analyses of the study. We will offer 2  
31 weeks of makeup sessions at the end of the 12 weeks. If a participant drops out before  
32 completing 30 sessions, we will encourage them to complete the post-study outcome  
33 measures and the satisfaction survey. We will use the number of sessions completed as  
34 a covariate in the analyses.  
35  
36  
37  
38  
39  
40  
41  
42  
43  
44  
45  
46  
47

### 48 **Outcome Measures**

49  
50 All outcome measures are summarized in Table 2.  
51  
52

53 Table 2: Outcome Measures  
54  
55  
56  
57  
58  
59  
60

| <b>PRIMARY OUTCOME MEASURE</b>    |                            |                                |                               |
|-----------------------------------|----------------------------|--------------------------------|-------------------------------|
| <b>Measure</b>                    | <b>Modality Assessed</b>   | <b>Method of Ascertainment</b> | <b>Timepoints</b>             |
| <b>Peak heart rate</b>            | Cardiovascular function    | Polar OH1/Polar Beat app       | Each session                  |
| <b>SECONDARY OUTCOME MEASURES</b> |                            |                                |                               |
| <b>Measure</b>                    | <b>Modality Assessed</b>   | <b>Method of Ascertainment</b> | <b>Timepoints</b>             |
| Demographics                      | --                         | REDCap survey                  | Before first session          |
| Attendance                        | Adherence                  | REDCap time stamps             | Each session                  |
| Baseline heart rate               | Cardiovascular function    | Polar OH1/Polar Beat app       | Each session                  |
| Heart rate at end of session      | Cardiovascular function    | Polar OH1/Polar Beat app       | Each session                  |
| Heart rate recovery               | Cardiovascular function    | Polar OH1/Polar Beat app       | Each session                  |
| Blood pressure                    | Cardiovascular function    | Automatic BP device            | Before and after each session |
| Rate of Perceived Exertion        | Cardiopulmonary fitness    | REDCap survey                  | Before and after each session |
| Perceived Wellness Survey         | Wellness                   | REDCap survey                  | Baseline, weeks 6, 12, 16     |
| Physical Activity Enjoyment Scale | Enjoyment of exercise      | REDCap survey                  | Baseline, weeks 6, 12, 16     |
| Short Form-36                     | Physical and mental health | REDCap survey                  | Baseline, weeks 6, 12, 16     |
| Numerical Pain Rating Scale       | Pain                       | REDCap survey                  | Baseline, weeks 6, 12, 16     |
| Reason for Exercise Inventory     | Motivation to exercise     | REDCap survey                  | Baseline, weeks 6, 12, 16     |
| Participant Feedback Survey       | Participant satisfaction   | REDCap survey                  | End of study or at dropout    |

## Demographics

We will collect the following demographics by having each participant complete a demographics data entry form on REDCap: age, gender, neurological diagnosis, time of diagnosis, and comorbid health issues (e.g., diabetes, high blood pressure, etc.). We will also document whether a person needs assistance with walking or transfers. In addition, we will require each participant to receive written medical clearance by their doctor to participate in the study, and if any exercise restrictions need to be followed.

## Primary outcome measure: Peak heart rate during exercise

Continuous heart rate tracking is the primary outcome measure for the study. All participants will receive the OH1 Polar HR monitor as part of their exercise kit for the study (Figure 2). The Polar OH1 (Polar Electro Inc., Bethpage, NY, USA) is an optical heart rate sensor on an armband that records HR activity. It has 6 LED sensors that record at 1-second intervals<sup>38</sup>. HR activity is recorded via Bluetooth to a phone compatible with the Polar Flow or Polar Beat app. It has validity in moderate to vigorous intensity exercises and high endurance sports activities<sup>38-40</sup>.

Immediately before each exercise session, participants will turn on their OH1 monitor. Then, the participant will open the Polar Beat app on their smart phone and hit “start” when the exercise session begins. The Polar OH1 continuously records heart rate (HR) at 10Hz when the device is powered on and the Polar Beat app recording has been started. Participants will record HR through the entire exercise session and for 10 minutes after completion of the session to capture HR during exercise as well as HR

1  
2  
3 recovery for 10 minutes after the end of exercise sessions. The live group will be  
4 supervised by the research team for each session. The pre-recorded groups will have  
5 the research team available for assistance and troubleshooting. Data are stored on the  
6 Polar Coach website, where study staff can export sessions as CSV files that are then  
7 processed in MATLAB (MathWorks). In MATLAB, peak HR (primary measure) will be  
8 calculated.  
9

## 17 **Secondary outcome measures**

### 19 *Measures acquired at each exercise session*

20 We will calculate secondary measures of HR in MATLAB using the same Polar CSV  
21 files mentioned above: baseline HR, HR at end of session, and HR at 30s intervals for  
22 10min after the end of the session will be analyzed, to measure heart rate recovery.  
23

24 At each session, participants will complete an online assessment to rate the level of  
25 pain and perceived exertion (RPE), BP, HR, and adverse events before and after the  
26 exercise session. Additionally, as described above, attendance will be taken at each  
27 session as a measure of adherence. After the session is over, participants will complete  
28 a lab-developed survey to rate their experience on a 10-point scale from 1 (not a good  
29 experience) to 10 (very good experience) on questions related to motivation, energy,  
30 satisfaction, and performance. In addition, participants will provide information on  
31 changes related to health, falls, or other adverse events.  
32

### 33 *Measures acquired at specified times during the intervention*

34 A comprehensive set of secondary outcome measures will be completed by participants  
35 at baseline, mid-study (6 weeks), end of study (12 weeks) and follow-up after one  
36  
37  
38  
39  
40  
41  
42  
43  
44  
45  
46  
47  
48  
49  
50  
51  
52  
53  
54  
55  
56  
57  
58  
59  
60

1  
2  
3 month. All questionnaires will be self-administered or administered by a trained  
4  
5 researcher virtually using REDCap.  
6  
7

8 Perceived Wellness Survey (PWS): Participants will quantify their perceived health  
9  
10 status by completing the PWS. The PWS is a 36-item instrument used to measure an  
11  
12 individual's perceived health status in physical, psychological, emotional, intellectual,  
13  
14 spiritual, and social wellness constructs. Items under each construct are scored on a  
15  
16 scale of 1 (very strongly disagree) to 6 (very strongly agree). Higher scores indicate  
17  
18 better perceived wellness. The PWS has good reliability and validity in healthy and  
19  
20 neurological populations<sup>41-43</sup>.  
21  
22  
23

24 Physical Activity Enjoyment Scale (PACES): the PACES is a self-assessment measure  
25  
26 of enjoyment with their current physical activity. It is an 18-item scale with scoring from  
27  
28 1 (I enjoy it) to 7 (I hate it). Scores on the bipolar rating scale are summed with higher  
29  
30 scores indicative of more enjoyment. It is reliable and valid in neurological populations<sup>44-  
31  
32 47</sup>.  
33  
34  
35

36 Short Form-36 Health Survey (SF-36): the SF-36 measures physical health and mental  
37  
38 health. There are eight scales - Physical Functioning, Physical Role Limitations, Bodily  
39  
40 Pain, General Health, Vitality, Social Functioning, Emotional Role Limitations, and  
41  
42 Mental Health. It is easy to use with good validity and reliability in neurological  
43  
44 populations<sup>48-51</sup>.  
45  
46  
47

48 Numerical pain rating (NPR) scale: the NPR is a standardized instrument for pain  
49  
50 assessment in clinical and research practice. It is an 11-point scale from 0 (no pain) to  
51  
52 10 (the most intense pain) at rest and during movement. It is simple to use with high  
53  
54  
55  
56  
57  
58  
59  
60

1  
2  
3 sensitivity to changes in chronic pain in adult populations<sup>52, 53</sup>. It is reliable and valid for  
4  
5 pain assessments of neurological populations<sup>54</sup>.  
6  
7

8 Borg's Rating Scale of Perceived Exertion (RPE): the Borg RPE is a widely used  
9  
10 standardized measure to evaluate perceived intensity of exertion, effort, and fatigue  
11  
12 during physical exercise. The scale ranges from 6 (no exertion at all) to 20 (absolute  
13  
14 maximum). Higher ratings on the scale indicate greater overall body exertion. It is a  
15  
16 reliable and valid measure in neurological populations<sup>55-62</sup>.  
17  
18

19  
20 Reason for exercise inventory (REI): the REI is a 24-item scale to assess the reason  
21  
22 that motivates a person to exercise. The modified version has 4 subscales:  
23  
24 Weight/appearance management, fitness/health management, stress/emotion  
25  
26 management, and socialization. A 7-point scale ranges from 1 (not at all important) to 7  
27  
28 (extremely important). Higher scores represent greater motivation to exercise<sup>63</sup>.  
29  
30

31  
32 Participant feedback: on study completion, or when withdrawn/dropped out from the  
33  
34 study, participants will complete a study feedback form. The feedback will be based on  
35  
36 study acceptance, ease of using HR and BP devices and exercise equipment, and  
37  
38 support from the research team. Participants who do not complete the study will also  
39  
40 provide their final timepoint measure at the end of their final exercise session.  
41  
42  
43  
44  
45  
46

## 47 **Statistical Methods**

48  
49 Descriptive statistics (including mean, standard deviation, median, interquartile range,  
50  
51 frequency, and percent) will be calculated for demographic and clinical characteristics of  
52  
53 the study participants.. Analysis of Covariance (ANCOVA) will be used to evaluate the  
54  
55  
56  
57  
58  
59



1  
2  
3 independent effect of synchronous versus asynchronous group status on change in  
4 peak heart rate (first session versus final session), after controlling for baseline heart  
5 rate and any other factors that may remain imbalanced between groups after  
6 randomization. Adjusted mean differences in peak heart rate (first session versus final  
7 session) between the synchronous and asynchronous groups and 95% confidence  
8 intervals for these differences will be estimated from the multivariable ANCOVA model.  
9  
10 Similar analyses as described above will be performed for other continuous outcomes  
11 (primary and secondary), including Borg's RPE scale, mood, motivation, and pain  
12 scales, Perceived Wellness Survey, SF-36v2 score, and PACES score. Categorical  
13 variables (e.g., safety questions, adverse events, medication changes, etc.) will be  
14 compared between the synchronous and asynchronous groups (at baseline, 6 weeks,  
15 and 12 weeks) by the chi-square test or Fisher's exact test, as appropriate. Generalized  
16 estimating equations (GEE) modeling will also be explored to evaluate between-group  
17 differences over repeated assessments, and to account for potential missing data in  
18 some of the outcome variables at one or more of the evaluation time points. All  
19 estimates from the multivariable models will serve as preliminary data (i.e., hypothesis-  
20 generating) for future studies. All p-values will be two-sided with statistical significance  
21 evaluated at the 0.05 alpha level. Ninety-five percent confidence intervals for all  
22 parameters of interest will be calculated to assess the precision of the obtained  
23 estimates. All analyses will be performed in R and SPSS by a person blinded to  
24 treatment allocation.  
25  
26  
27  
28  
29  
30  
31  
32  
33  
34  
35  
36  
37  
38  
39  
40  
41  
42  
43  
44  
45  
46  
47  
48  
49  
50  
51  
52  
53  
54

## 55 **Data Management**

56  
57  
58  
59  
60

1  
2  
3 Participant identifying information will be kept confidential by providing a unique  
4 identification number (ID number) for the course of the study. To maintain privacy, only  
5 authorized research investigators involved in the study will have access to participant  
6 information. Password protected laptops, online documents, and access to cloud-based  
7 servers will prevent leaks in data privacy. All records including informed consent,  
8 screening tools, medical records, and participant surveys will be completed, and  
9 documented on REDCap, a HIPAA-compliant online research database.  
10  
11  
12  
13  
14  
15  
16  
17  
18  
19

20 Privacy on Zoom platform: Our institutional Zoom account (through Weill Cornell  
21 Medicine) is compliant with HIPAA guidelines. Participant profile names will be updated  
22 to display their ID. After each session, the recorded video will be uploaded to the  
23 password protected WCM cloud-based server. Respective group participants will be  
24 given the live Zoom links (synchronous) or passwords to access the asynchronous  
25 Zoom sessions.  
26  
27  
28  
29  
30  
31  
32  
33

34 Polar OH1 HR monitor (Optical HR sensor): Participants' profiles using allotted ID's will  
35 be created in the Polar Beat App and the Flow for Coach cloud-based online platform.  
36 All information uploaded to the platform will be accessible by the investigators using a  
37 secured login ID and password.  
38  
39  
40  
41  
42  
43

44 Adverse events, change in medications, and protocol deviation will be documented and  
45 updated before and after each class on REDCap. The study team will perform weekly  
46 self-audits to ensure data quality and completeness.  
47  
48  
49  
50

51 *Procedure for handling missing data*  
52  
53  
54  
55  
56  
57  
58  
59  
60

1  
2  
3 This study is an intention-to-treat trial. If data are missing, we will use a mixed linear  
4 regression model that accounts for uneven numbers of data points across participants.  
5  
6  
7  
8  
9

### 10 11 **Data Monitoring and Stopping Rules**

12  
13 Since this is a low-risk study, our IRB determined that a data monitoring committee is  
14 not necessary. We will audit our data weekly and assess safety data at each session. If  
15 we find an increase in pain by 25% or a decrease in quality of life measures by 25%  
16 across participants in a cohort, we will pause the trial and evaluate how to improve the  
17 safety of the study.  
18  
19  
20  
21  
22  
23  
24  
25  
26  
27  
28

### 29 **Current Status of Study**

30  
31 We have performed a feasibility cohort, with people with a range of abilities and  
32 diagnoses. The first participant was consented on 01/22/2021, for an intervention that  
33 began on 03/24/2021 and ended on 06/28/2021. In this feasibility study, we determined  
34 that participants could readily complete the online assessments, exercise sessions, and  
35 could effectively use Zoom, the Polar OH1 sensor and Polar Beat app, and the blood  
36 pressure measurement device. Our next step will be to enroll separate cohorts of  
37 people with specific neurological diagnoses, such as cerebral palsy, stroke, and multiple  
38 sclerosis. This will begin in 2023.  
39  
40  
41  
42  
43  
44  
45  
46  
47  
48  
49  
50  
51  
52

### 53 **Resource Sharing Plan**

1  
2  
3 We plan to use the concept, methods and analysis as a framework to develop evidence-  
4 based protocols for future cohorts and studies. We have made a commitment to publish  
5 all relevant scientific information in a timely manner. Unpublished information may be  
6 available to interested individuals or organizations by request to the Principal  
7 Investigator.  
8  
9  
10  
11  
12  
13

### 14 15 16 17 18 **Ethics and Dissemination**

19  
20 The study was approved by the BRANY Institutional Review Board on 9/22/2020,  
21 protocol #20-08-388-512. All study participants will provide written informed consent  
22 before participation. All protocol deviations, adverse events, and protocol modifications  
23 will be reported to the IRB immediately. The results of the study will be disseminated to  
24 the academic community via publications and presentations. The deidentified study data  
25 will be shared on our laboratory website.  
26  
27  
28  
29  
30  
31  
32  
33  
34  
35  
36  
37

38 **Trial Registration:** Clinicaltrials.gov NCT04564495.  
39

40  
41 **Acknowledgements:** We thank the Sabrina Cohen Foundation for funding and for  
42 commitment to assist with study development and recruitment. We thank Devon  
43 Palermo at DPI Adaptive Fitness who will serve as the adaptive fitness instructor for this  
44 study.  
45  
46  
47  
48  
49

50  
51 **Contributors:** KMF is the Principal Investigator. KMF, AAD and AB were responsible  
52 for ethics applications and reporting. AAD, AB, DSK, RMG, LEJC, TAC and KMF  
53  
54  
55  
56  
57  
58  
59  
60

1  
2  
3 drafted the final version of this manuscript. All authors have contributed to the writing  
4  
5 and critical review of the manuscript and have approved the final version.  
6  
7

8 **Funding:** This work is supported by funding from the Sabrina Cohen Foundation and  
9  
10 the Burke Foundation. This work is supported by grant number UL1 TR 002384 from the  
11  
12 National Center for Advancing Translational Sciences (NCATS) of the National  
13  
14 Institutes of Health (NIH).  
15  
16

17  
18 **Role of Funder in Study:** The Sabrina Cohen Foundation has established the tele-  
19  
20 exercise classes we are studying and will assist with recruitment. The Sabrina Cohen  
21  
22 Foundation and Burke Foundation will have no role in data collection, analyses,  
23  
24 interpretation, or publication of the work.  
25  
26

27  
28 **Competing Interests:** None to declare  
29  
30  
31  
32  
33  
34  
35  
36  
37  
38  
39  
40  
41  
42  
43  
44  
45  
46  
47  
48  
49  
50  
51  
52  
53  
54  
55  
56  
57  
58  
59  
60

## References

1. Gkatzamanis V, Magriplis E, Panagiotakos D. The effect of physical activity interventions on cognitive function of older adults: A systematic review of clinical trials. *Psychiatriki*. 2022.
2. Johansson ME, Cameron IGM, Van der Kolk NM, de Vries NM, Klimars E, Toni I, et al. Aerobic Exercise Alters Brain Function and Structure in Parkinson's Disease: A Randomized Controlled Trial. *Ann Neurol*. 2022;91(2):203-16.
3. Li Q, Wu C. Social Interaction, Lifestyle, and Depressive Status: Mediators in the Longitudinal Relationship between Cognitive Function and Instrumental Activities of Daily Living Disability among Older Adults. *Int J Environ Res Public Health*. 2022;19(7).
4. Minto LR, Ellis R, Cherry KE, Wood RH, Barber SJ, Carter S, et al. Impact of cardiovascular risk factors on the relationships of physical activity with mood and cognitive function in a diverse sample. *Neuropsychol Dev Cogn B Aging Neuropsychol Cogn*. 2022:1-14.
5. Rosado H, Bravo J, Raimundo A, Carvalho J, Marmeleira J, Pereira C. Effects of two 24-week multimodal exercise programs on reaction time, mobility, and dual-task performance in community-dwelling older adults at risk of falling: a randomized controlled trial. *BMC Public Health*. 2021;21(Suppl 2):408.
6. Schuch FB, Vancampfort D, Firth J, Rosenbaum S, Ward PB, Silva ES, et al. Physical Activity and Incident Depression: A Meta-Analysis of Prospective Cohort Studies. *Am J Psychiatry*. 2018;175(7):631-48.

- 1  
2  
3 7. Yang PY, Ho KH, Chen HC, Chien MY. Exercise training improves sleep quality  
4 in middle-aged and older adults with sleep problems: a systematic review. *J Physiother.*  
5  
6 2012;58(3):157-63.  
7
- 8  
9 8. Yuan Y, Chen X, Zhang L, Wu J, Guo J, Zou D, et al. The roles of exercise in  
10 bone remodeling and in prevention and treatment of osteoporosis. *Prog Biophys Mol*  
11  
12 *Biol.* 2016;122(2):122-30.  
13  
14
- 15 9. Moore SA, Flynn D, Jones S, Price CIM, Avery L. Feasibility, acceptability, and  
16 fidelity of Physical Activity Routines After Stroke (PARAS): a multifaceted behaviour  
17 change intervention targeting free-living physical activity and sedentary behaviour in  
18 community-dwelling adult stroke survivors. *Pilot Feasibility Stud.* 2022;8(1):197.  
19  
20  
21  
22  
23  
24
- 25 10. Ryan JM, Allen E, Gormley J, Hurvitz EA, Peterson MD. The risk, burden, and  
26 management of non-communicable diseases in cerebral palsy: a scoping review. *Dev*  
27  
28 *Med Child Neurol.* 2018;60(8):753-64.  
29  
30  
31
- 32 11. Zwierzchowska A, Rosolek B, Sikora M, Celebanska D. Forced Sedentariness  
33 and Sports Activity as Factors Differentiating Anthropometric Characteristics, Indices,  
34 and Body Composition in People with Disabilities. *Biology (Basel).* 2022;11(6).  
35  
36  
37  
38
- 39 12. Jasinska-Mikolajczyk A, Drews K, Domaszewska K, Kolasa G, Konofalska M,  
40 Jowik K, et al. The Effect of Physical Activity on Neurotrophin Concentrations and  
41 Cognitive Control in Patients With a Depressive Episode. *Front Psychiatry.*  
42  
43 2022;13:777394.  
44  
45  
46  
47
- 48 13. Lampousi AM, Berglind D, Forsell Y. Association of changes in cardiorespiratory  
49 fitness with health-related quality of life in young adults with mobility disability:  
50  
51  
52  
53  
54  
55  
56  
57  
58  
59  
60

- 1  
2  
3 secondary analysis of a randomized controlled trial of mobile app versus supervised  
4 training. BMC Public Health. 2020;20(1):1721.  
5  
6  
7  
8 14. Dimyan MA, Cohen LG. Neuroplasticity in the context of motor rehabilitation after  
9 stroke. Nat Rev Neurol. 2011;7(2):76-85.  
10  
11  
12 15. Knaepen K, Goekint M, Heyman EM, Meeusen R. Neuroplasticity - exercise-  
13 induced response of peripheral brain-derived neurotrophic factor: a systematic review of  
14 experimental studies in human subjects. Sports Med. 2010;40(9):765-801.  
15  
16  
17 16. Li C, Ke C, Su Y, Wan C. Exercise Intervention Promotes the Growth of  
18 Synapses and Regulates Neuroplasticity in Rats With Ischemic Stroke Through  
19 Exosomes. Front Neurol. 2021;12:752595.  
20  
21  
22 17. Penna LG, Pinheiro JP, Ramalho SHR, Ribeiro CF. Effects of aerobic physical  
23 exercise on neuroplasticity after stroke: systematic review. Arq Neuropsiquiatr.  
24 2021;79(9):832-43.  
25  
26  
27 18. Phillips C. Lifestyle Modulators of Neuroplasticity: How Physical Activity, Mental  
28 Engagement, and Diet Promote Cognitive Health during Aging. Neural Plast.  
29 2017;2017:3589271.  
30  
31  
32 19. Legerlotz K. The Effects of Resistance Training on Health of Children and  
33 Adolescents With Disabilities. Am J Lifestyle Med. 2020;14(4):382-96.  
34  
35  
36 20. O'Connell ML, Coppinger T, McCarthy AL. The role of nutrition and physical  
37 activity in frailty: A review. Clin Nutr ESPEN. 2020;35:1-11.  
38  
39  
40 21. van der Scheer JW, Martin Ginis KA, Ditor DS, Goosey-Tolfrey VL, Hicks AL,  
41 West CR, et al. Effects of exercise on fitness and health of adults with spinal cord injury:  
42 A systematic review. Neurology. 2017;89(7):736-45.  
43  
44  
45  
46  
47  
48  
49  
50  
51  
52  
53  
54  
55  
56  
57  
58  
59  
60



- 1  
2  
3 22. Fleming KM, Herring MP, Coote SB, Tindall D. Participant experiences of eight  
4 weeks of supervised or home-based Pilates among people with multiple sclerosis: a  
5 qualitative analysis. *Disabil Rehabil*. 2021:1-8.  
6  
7  
8  
9  
10 23. Forgea MC, Lyons AG, Lorenz RA. Barriers and Facilitators to Engagement in  
11 Rehabilitation Among Stroke Survivors: An Integrative Review. *Rehabil Nurs*.  
12 2021;46(6):340-7.  
13  
14  
15  
16  
17 24. Giroux EE, Casemore S, Clarke TY, McBride CB, Wuerstl KR, Gainforth HL.  
18 Enhancing participation while aging with spinal cord injury: applying behaviour change  
19 frameworks to develop intervention recommendations. *Spinal Cord*. 2021;59(6):665-74.  
20  
21  
22  
23  
24 25. Hickingbotham MR, Wong CJ, Bowling AB. Barriers and facilitators to physical  
25 education, sport, and physical activity program participation among children and  
26 adolescents with psychiatric disorders: a systematic review. *Transl Behav Med*.  
27 2021;11(9):1739-50.  
28  
29  
30  
31  
32  
33 26. Karssemeijer EGA, de Klijn FH, Bossers WJR, Olde Rikkert MGM, van Heuvelen  
34 MJG. Ranking Barriers, Motivators, and Facilitators to Promote Physical Activity  
35 Participation of Persons With Dementia: An Explorative Study. *J Geriatr Phys Ther*.  
36 2020;43(2):71-81.  
37  
38  
39  
40  
41  
42 27. Keramat SA, Ahammed B, Mohammed A, Seidu AA, Farjana F, Hashmi R, et al.  
43 Disability, physical activity, and health-related quality of life in Australian adults: An  
44 investigation using 19 waves of a longitudinal cohort. *PLoS One*. 2022;17(5):e0268304.  
45  
46  
47  
48  
49 28. Kirk TN, Haegele JA, Zhu X. Barriers, Expectancy-Value Beliefs, and Physical  
50 Activity Engagement Among Adults With Visual Impairments. *Adapt Phys Activ Q*.  
51 2021;38(2):286-306.  
52  
53  
54  
55  
56  
57  
58  
59  
60

- 1  
2  
3 29. Lindsay RK, Carmichael C, Allen PM, Fossey M, Godier-McBard L, Butler L, et  
4 al. Fishing Participation, Motivators and Barriers among UK Anglers with Disabilities:  
5 Opportunities and Implications for Green Social Prescribing. *Int J Environ Res Public*  
6 *Health*. 2022;19(8).  
7  
8  
9  
10  
11  
12 30. McDermott G, Brick NE, Shannon S, Fitzpatrick B, Taggart L. Barriers and  
13 facilitators of physical activity in adolescents with intellectual disabilities: An analysis  
14 informed by the COM-B model. *J Appl Res Intellect Disabil*. 2022;35(3):800-25.  
15  
16  
17  
18  
19 31. McKenzie G, Willis C, Shields N. Barriers and facilitators of physical activity  
20 participation for young people and adults with childhood-onset physical disability: a  
21 mixed methods systematic review. *Dev Med Child Neurol*. 2021;63(8):914-24.  
22  
23  
24  
25  
26 32. Nightingale TE, Heneghan NR, Fenton SAM, Veldhuijzen van Zanten J, Jutzeler  
27 CR. Physical Activity and Health-Related Quality of Life in Adults With a Neurologically-  
28 Related Mobility Disability During the COVID-19 Pandemic: An Exploratory Analysis.  
29 *Front Neurol*. 2021;12:699884.  
30  
31  
32  
33  
34  
35 33. Pedersen MRL, Hansen AF, Elmoose-Osterlund K. Motives and Barriers Related  
36 to Physical Activity and Sport across Social Backgrounds: Implications for Health  
37 Promotion. *Int J Environ Res Public Health*. 2021;18(11).  
38  
39  
40  
41  
42 34. Pinto SM, Newman MA, Hirsch MA. Perceived Barriers to Exercise in Adults with  
43 Traumatic Brain Injury Vary by Age. *J Funct Morphol Kinesiol*. 2018;3(3).  
44  
45  
46  
47 35. Porteny T, Alegria M, Del Cueto P, Fuentes L, Markle SL, NeMoyer A, et al.  
48 Barriers and strategies for implementing community-based interventions with minority  
49 elders: positive minds-strong bodies. *Implement Sci Commun*. 2020;1:41.  
50  
51  
52  
53  
54  
55  
56  
57  
58  
59  
60

- 1  
2  
3 36. Schootemeijer S, van der Kolk NM, Ellis T, Mirelman A, Nieuwboer A, Nieuwhof  
4 F, et al. Barriers and Motivators to Engage in Exercise for Persons with Parkinson's  
5 Disease. *J Parkinsons Dis*. 2020;10(4):1293-9.  
6  
7  
8  
9  
10 37. Costa RRG, Dorneles JR, Veloso JH, Goncalves CW, Neto FR. Synchronous  
11 and asynchronous tele-exercise during the coronavirus disease 2019 pandemic:  
12 Comparisons of implementation and training load in individuals with spinal cord injury. *J*  
13 *Telemed Telecare*. 2021:1357633X20982732.  
14  
15  
16  
17  
18 38. Hermand E, Cassirame J, Ennequin G, Hue O. Validation of a  
19 Photoplethysmographic Heart Rate Monitor: Polar OH1. *Int J Sports Med*.  
20 2019;40(7):462-7.  
21  
22  
23  
24  
25 39. Hettiarachchi IT, Hanoun S, Nahavandi D, Nahavandi S. Validation of Polar OH1  
26 optical heart rate sensor for moderate and high intensity physical activities. *PLoS One*.  
27 2019;14(5):e0217288.  
28  
29  
30  
31  
32 40. Schubert MM, Clark A, De La Rosa AB. The Polar ® OH1 Optical Heart Rate  
33 Sensor is Valid during Moderate-Vigorous Exercise. *Sports Med Int Open*.  
34 2018;2(3):E67-E70.  
35  
36  
37  
38  
39 41. Hamdani Y, Yee T, Oake M, McPherson AC. Multi-stakeholder perspectives on  
40 perceived wellness of Special Olympics athletes. *Disabil Health J*. 2019;12(3):422-30.  
41  
42  
43  
44 42. Kaveh MH, Ostovarfar J, Keshavarzi S, Ghahremani L. Validation of Perceived  
45 Wellness Survey (PWS) in a Sample of Iranian Population. *Malays J Med Sci*.  
46 2016;23(4):46-53.  
47  
48  
49  
50 43. Sekiguchi Y, Curtis RM, Huggins RA, Benjamin CL, Walker AJ, Arent SM, et al.  
51 The Relationships Between Perceived Wellness, Sleep, and Acute: Chronic Training  
52  
53  
54  
55  
56  
57  
58  
59  
60

1  
2  
3 Load in National Collegiate Athletics Association Division I Male Soccer Players. J  
4 Strength Cond Res. 2021;35(5):1326-30.  
5  
6

7  
8 44. Jekauc D, Voelkle M, Wagner MO, Mewes N, Woll A. Reliability, validity, and  
9 measurement invariance of the German version of the physical activity enjoyment scale.  
10 J Pediatr Psychol. 2013;38(1):104-15.  
11  
12

13  
14 45. Mullen SP, Olson EA, Phillips SM, Szabo AN, Wojcicki TR, Mailey EL, et al.  
15 Measuring enjoyment of physical activity in older adults: invariance of the physical  
16 activity enjoyment scale (paces) across groups and time. Int J Behav Nutr Phys Act.  
17 2011;8:103.  
18  
19

20  
21 46. Murrock CJ, Bekhet A, Zauszniewski JA. Psychometric Evaluation of the  
22 Physical Activity Enjoyment Scale in Adults with Functional Limitations. Issues Ment  
23 Health Nurs. 2016;37(3):164-71.  
24  
25

26  
27 47. Teques P, Calmeiro L, Silva C, Borrego C. Validation and adaptation of the  
28 Physical Activity Enjoyment Scale (PACES) in fitness group exercisers. J Sport Health  
29 Sci. 2020;9(4):352-7.  
30  
31

32  
33 48. Anderson C, Laubscher S, Burns R. Validation of the Short Form 36 (SF-36)  
34 health survey questionnaire among stroke patients. Stroke. 1996;27(10):1812-6.  
35  
36

37  
38 49. Knox SA, King MT. Validation and calibration of the SF-36 health transition  
39 question against an external criterion of clinical change in health status. Qual Life Res.  
40 2009;18(5):637-45.  
41  
42

43  
44 50. Rotstein Z, Barak Y, Noy S, Achiron A. Quality of life in multiple sclerosis:  
45 development and validation of the 'RAYS' scale and comparison with the SF-36. Int J  
46 Qual Health Care. 2000;12(6):511-7.  
47  
48

- 1  
2  
3 51. Wan C, Tu X, Messing S, Li X, Yang Z, Zhao X, et al. Development and  
4 validation of the general module of the system of quality of life instruments for chronic  
5 diseases and its comparison with SF-36. *J Pain Symptom Manage*. 2011;42(1):93-104.  
6  
7  
8  
9  
10 52. Farrar JT, Young JP, Jr., LaMoreaux L, Werth JL, Poole MR. Clinical importance  
11 of changes in chronic pain intensity measured on an 11-point numerical pain rating  
12 scale. *Pain*. 2001;94(2):149-58.  
13  
14  
15  
16  
17 53. Turk DC, Rudy TE, Sorkin BA. Neglected topics in chronic pain treatment  
18 outcome studies: determination of success. *Pain*. 1993;53(1):3-16.  
19  
20  
21  
22 54. Farrar JT, Troxel AB, Stott C, Duncombe P, Jensen MP. Validity, reliability, and  
23 clinical importance of change in a 0-10 numeric rating scale measure of spasticity: a  
24 post hoc analysis of a randomized, double-blind, placebo-controlled trial. *Clin Ther*.  
25  
26  
27  
28 2008;30(5):974-85.  
29  
30  
31 55. Abadie BR. Effect of viewing the RPE scale on the ability to make ratings of  
32 perceived exertion. *Percept Mot Skills*. 1996;83(1):317-8.  
33  
34  
35  
36 56. Chung PK, Zhao Y, Liu JD, Quach B. A Brief Note on the Validity and Reliability  
37 of the Rating of Perceived Exertion Scale in Monitoring Exercise Intensity among  
38 Chinese Older Adults in Hong Kong. *Percept Mot Skills*. 2015;121(3):805-9.  
39  
40  
41  
42 57. Compagnat M, Salle JY, Mandigout S, Lacroix J, Vuillerme N, Daviet JC. Rating  
43 of perceived exertion with Borg scale in stroke over two common activities of the daily  
44 living. *Top Stroke Rehabil*. 2018;25(2):145-9.  
45  
46  
47  
48  
49 58. Morishita S, Tsubaki A, Hotta K, Kojima S, Sato D, Shirayama A, et al.  
50  
51 Relationship Between the Borg Scale Rating of Perceived Exertion and Leg-Muscle  
52  
53  
54  
55  
56  
57  
58  
59  
60

1  
2  
3 Deoxygenation During Incremental Exercise in Healthy Adults. *Adv Exp Med Biol.*  
4  
5 2021;1269:95-9.  
6

7  
8 59. Morishita S, Tsubaki A, Nashimoto S, Fu JB, Onishi H. Face scale rating of  
9  
10 perceived exertion during cardiopulmonary exercise test. *BMJ Open Sport Exerc Med.*  
11  
12 2018;4(1):e000474.  
13

14  
15 60. Morishita S, Tsubaki A, Takabayashi T, Fu JB. Relationship between the rating of  
16  
17 perceived exertion scale and the load intensity of resistance training. *Strength Cond J.*  
18  
19 2018;40(2):94-109.  
20

21  
22 61. Penko AL, Barkley JE, Koop MM, Alberts JL. Borg scale is valid for ratings of  
23  
24 perceived exertion for individuals with Parkinson's disease. *Int J Exerc Sci.*  
25  
26 2017;10(1):76-86.  
27

28  
29 62. Skinner JS, Hutsler R, Bergsteinova V, Buskirk ER. The validity and reliability of  
30  
31 a rating scale of perceived exertion. *Med Sci Sports.* 1973;5(2):94-6.  
32

33  
34 63. Cash TF, Now PL, Grant JR. Why Do Women Exercise? Factor Analysis and  
35  
36 Further Validation of the Reasons for Exercise Inventory. *Percept Mot Skills.*  
37  
38 1994;78(2):539-44.  
39

## Figure Legends

Figure 1: Study flow diagram.

Figure 2: Polar OH1 Heart Rate monitor. A. Picture of the monitor and charger. B. Proper placement of the monitor, with the device on the forearm. C. The Polar Beat app on a smart phone streams data in real time from the OH1 monitor via Bluetooth. D. After a session, data are retrievable from the Polar Coach website, where it is exported to a CSV file and processed in MATLAB.

1  
2  
3  
4  
5  
6  
7  
8  
9  
10  
11  
12  
13  
14  
15  
16  
17  
18  
19  
20  
21  
22  
23  
24  
25  
26  
27  
28  
29  
30  
31  
32  
33  
34  
35  
36  
37  
38  
39  
40  
41  
42  
43  
44  
45  
46  
47  
48  
49  
50  
51  
52  
53  
54  
55  
56  
57  
58  
59  
60



Study flow diagram.

254x168mm (300 x 300 DPI)



1  
2  
3  
4  
5  
6  
7  
8  
9  
10  
11  
12  
13  
14  
15  
16  
17  
18  
19  
20  
21  
22  
23  
24  
25  
26  
27  
28  
29  
30  
31  
32  
33  
34  
35  
36  
37  
38  
39  
40  
41  
42  
43  
44  
45  
46  
47  
48  
49  
50  
51  
52  
53  
54  
55  
56  
57  
58  
59  
60

**A**



**B**



**C**



**D**



Polar OH1 Heart Rate monitor. A. Picture of the monitor and charger. B. Proper placement of the monitor, with the device on the forearm. C. The Polar Beat app on a smart phone streams data in real time from the OH1 monitor via Bluetooth. D. After a session, data are retrievable from the Polar Coach website, where it is exported to a CSV file and processed in MATLAB.

254x212mm (300 x 300 DPI)

# Informed Consent Form

This form explains our study and asks you to agree to participate. Please read the form carefully. A member of our study team will talk with you over Zoom to explain the study. Thank you so much for your interest in our study!

---

BIOMEDICAL RESEARCH ALLIANCE OF NEW YORK  
THE BURKE NEUROLOGICAL INSTITUTE

## SUBJECT INFORMATION AND INFORMED CONSENT

Project Title: Home-Based Exercise for People with Chronic Neurological Impairments  
Principal Investigator: Kathleen Friel, PhD  
Institution Name: Burke Neurological Institute  
Institution Address: 785 Mamaroneck Ave, White Plains, NY 10605  
Telephone: 914-368-3116, 646-351-9063 (24 hour)  
Protocol # TELEX

---

## ABOUT VOLUNTEERING FOR THIS RESEARCH STUDY

You are invited to participate in a research study. The purpose of the study is to determine the effect of a home-based exercise program on cardiovascular fitness and your quality of life. We will assess your motivation, enjoyment and compliance to either a live or pre recorded exercise class on Zoom.

You are eligible for this study because you have a neurological impairment that you've had for at least six months. A neurological impairment is weakness in your arms and/or legs that was caused by a stroke, brain injury, spinal cord injury, or any other condition that affects your brain or spinal cord.

---

## WHY IS THIS STUDY BEING DONE?

Scientists at The Burke Neurological Institute (BNI) are partnering with the Sabrina Cohen Foundation (SCF) to test whether a home-based exercise program can improve cardiovascular health and quality of life in people who have had a chronic neurological impairment. We designed this study after the onset of COVID-19 in the United States. Since COVID-19 limits accessibility to gyms and other types of exercise venues, we hope to learn and understand the physiological and behavioral aspects of this rehabilitation strategy to optimize wellness after a neurological injury. You were selected as a possible participant in this study because you've had a neurological impairment for at least six months.

---

## WHAT WILL I DO IF I AGREE TO BE IN THIS STUDY?

If you agree to be in the study, you will participate in 36 at-home, Zoom-based exercise classes. Classes will be held three times a week, for twelve weeks. You will be randomized to either a live class with other video participants, or a pre-recorded class that you will take on your own.

Before the first class, we will review your medical history with you to be sure it is safe for you to be in the study. If you qualify for the study, we will send you a kit that contains items you will need for the study, including a heart rate monitor, blood pressure cuff and adjustable wrist weights. We will also send you some surveys that ask about your ability to do everyday activities, such as dressing and cooking.

After you receive your home exercise kit, we will have an orientation Zoom class. You will meet the other people in the exercise class. During the orientation, the study team will teach you how to use the heart rate monitor. If you cannot put on the heart rate monitor, we will ask that a caregiver be present to assist you during each class.

You will download one applications onto your phone or computer that will allow us to access the information from your heart rate monitor. No one but the research team will be able to see this information aside from you.

Each exercise class will take approximately one hour. Each session will begin with instructions and questions from the study team regarding your pain level, level of motivation, and blood pressure. The exercise portion of the class will take 45 minutes. At the end of the class, the study team will ask you additional questions, such as how hard you worked, pain level, level of motivation and blood pressure.

The class instructor will tailor exercises to different abilities, so everyone can be active and safe. The entire class will be done in a seated position.

1 Approximately 100 people will be enrolled in the live class, and 100 in the pre-recorded class.  
2

3 After the 18th class, which is midway through the study, we will send you another set of the same surveys you  
4 completed before the first class. We will send you a third set of surveys after the final class.  
5

---

#### 6 RISKS AND INCONVENIENCES OF THE STUDY

7 Your participation in the project might involve the following risks:  
8

9 The largest risk in this study is the risk of fatigue and muscle aches. These symptoms are common with exercise. The  
10 instructor will offer modifications of each exercise, to offer easier or more difficult options. You will always be  
11 welcome to use a modification, request an additional modification, or rest.  
12

13 The risk of fall in this study is small, since you will be seated. If you normally have trouble with stability of your torso  
14 while you are seated, we will ask that a caregiver be present in case a fall occurs.  
15

16 There is a risk that your personal health information be disclosed in error. For this study, we are using secure Zoom  
17 settings from an academic medical center, and we will require a password for each class, to mitigate this risk. The  
18 app containing your heart rate information will also be secure.  
19

---

#### 20 PERMISSION FOR PHOTOGRAPHY

21 We will record each live class, video and audio. Since we are not together in one space, we need to record each  
22 class for purposes of data collection. Therefore, we require each participant to agree to being recorded. We want to  
23 make sure that you understand this.  
24

---

25 Do you agree to be photographed in this study?

Yes

No

---

29 Please initial here to confirm your choice about being  
30 photographed during the study:  
31

---

#### 34 NEW INFORMATION

35 You will be told about any new significant findings developed during the course of the study that might affect your  
36 willingness to continue in the research.  
37

---

#### 38 COST OF STUDY TO PARTICIPANTS

39 There is no cost to you for participating in the research study.  
40

---

#### 41 BENEFITS OF THIS STUDY

42 Participation in this study is not guaranteed to benefit you. This study is only for the purpose of research. You may  
43 feel stronger by the end of the study, but there is no guarantee that this will occur. However, the information learned  
44 from this study may help other people in the future.  
45

---

#### 46 ALTERNATIVES TO STUDY PARTICIPATION

47 You do not have to participate in this research study to receive treatment for your condition. Your participation in  
48 this study is voluntary. If you decide to participate, you are free to discontinue participation at any time. Your  
49 participation in this study may be terminated without your consent by the study team or regulatory authorities, in  
50 certain circumstances, such as, if the investigator determines it is in your best interest, you cannot adhere to the  
51 study procedures, or in the event the study is terminated.  
52

---

#### 53 IN CASE OF INJURY

54 In accordance with Federal regulation, we are obligated to inform you about our policy in the event injury occurs. For  
55 medical emergencies, call 911. If, as a result of your participation, you experience injury from known or unknown  
56 risks of the research procedures as described, emergency medical care and treatment will be provided on our  
57 premises to the extent possible. We will assist you in obtaining additional medical care, as needed, but you will be  
58 responsible for the costs of such further medical treatment, either directly or through your medical insurance and/or  
59 other forms of medical coverage. No other compensation will be offered by or Burke Neurological Institute or the  
60 Biomedical Research Alliance of New York. Further information can be obtained from Dr Kathleen Friel (914  
368-3116). You are not waiving any legal right to seek additional compensation through the courts by signing this  
form.

## CONFIDENTIALITY

To the extent allowed by law, every effort will be made to keep your personal information confidential. However, information from this study will be submitted to the study sponsor and to the U.S. Food and Drug Administration. It may be submitted to governmental agencies in other countries where the study product may be considered for approval. Medical records, which identify you and the consent form signed by you, will be looked at by the sponsor or the sponsor's representatives and may be looked at by the FDA and other regulatory agencies, the Institutional Review Board, and the Biomedical Research Alliance of New York. While these parties are aware of the need to keep your information confidential, total confidentiality cannot be guaranteed. The results of this research project may be presented at meetings or in publications; however, you will not be identified in these presentations and/or publications.

Federal regulations give you certain rights related to your health information. These include the right to know who will be able to get the information and why they may be able to get it. The study doctor must get your authorization (permission) to use or give out any health information that might identify you. If you choose to be in this study, the study doctor will get personal information about you. This may include information that might identify you. The study doctor may also get information about your health, including:

- Past and present medical records
- Research records
- Records about phone calls made as part of this research
- Records about your study visits
- Information obtained during this research about laboratory test results
- Results from diagnostic and medical procedures including but not limited to X-rays, physical examinations and medical history
- Billing records

Information about your health may be used and given to others by the study doctor and staff. They might see the research information during and after the study. Your information may be given to the sponsor of this research. "Sponsor" includes any persons or companies that are working for or with the sponsor, or are owned by the sponsor. Information about you and your health which might identify you may be given to:

- The U.S. Food and Drug Administration
- Department of Health and Human Services agencies
- Governmental agencies in other countries
- Biomedical Research Alliance of New York (BRANY)
- The Institutional Review Board
- Accrediting agencies

Your personal health information may be further shared by the groups above. If shared by them, the information will no longer be covered by the U.S. federal privacy laws. However, these groups are committed to keeping your personal health information confidential. If you give permission to give your identifiable health information to a person or business, the information may no longer be protected. There is a risk that your information will be released to others without your permission.

Information about you and your health that might identify you may be given to others to carry out the research study. The sponsor will analyze and evaluate the results of the study. In addition, people from the sponsor and its consultants will be visiting the research site. They will follow how the study is done, and they will be reviewing your information for this purpose. The information may be given to the FDA. It may also be given to governmental agencies in other countries. This is done so the sponsor can receive marketing approval for new products resulting from this research. The information may also be used to meet the reporting requirements of governmental agencies.

This authorization does not have an expiration date. If you do not withdraw this authorization in writing, it will remain in effect indefinitely.

By signing this consent form, you are giving permission to use and give out the health information listed above for the purposes described above. You do not have to sign this consent form. If you choose not to sign this consent form, you will not be able to be in this research study. Your decision not to sign this consent form will not have any effect on your medical care and you will not lose any benefits or legal rights to which you are entitled. You have the right to review and copy your health information. However, if you decide to be in this study and sign this permission form, you may not be allowed to look at or copy your information until after the research is completed.

You may withdraw or take away your permission to use and disclose your health information at any time. You do this by sending written notice to the study doctor at the address on the front of this informed consent form. If you withdraw your permission, you will not be able to continue being in this study, but you will not have any penalty or loss of access to treatment or other benefits to which you are entitled. When you withdraw your permission, no new health information which might identify you will be gathered after that date. Information that has already been gathered may still be used and given to others. This would be done if it were necessary for the research to be reliable.

1 Notice Concerning HIV-Related Information: HIV-related information that either is collected as part of the research or  
2 that may already exist in your medical record might be accessed for the research by the research staff and the study  
3 sponsor, but will not be shared with others without your authorization, unless federal or state law requires the  
4 disclosure. You have a right to request a list of people who may receive or use your HIV-related information without  
5 authorization. If you experience discrimination because of the release or disclosure of HIV-related information, you  
6 may contact the New York State Division of Human Rights or New York City Commission on Human Rights. These  
7 agencies are responsible for protecting your rights.

---

#### 8 QUESTIONS ABOUT THIS STUDY

9 If you have any questions or requests for information relating to this research study or your participation in it, or if  
10 you want to voice a complaint or concern about this research, or if you have a study related injury, you may contact  
11 Dr. Friel at 914-368-3116, 646-351-9063 (24 hour).

12 If you have any questions about your rights as a research subject or complaints regarding this research study, or you  
13 are unable to reach the research staff, you may contact a person independent of the research team at the  
14 Biomedical Research Alliance of New York Institutional Review Board at 516-318-6877. Questions, concerns or  
15 complaints about research can also be registered with the Biomedical Research Alliance of New York Institutional  
16 Review Board at [www.branyirb.com/concerns-about-research](http://www.branyirb.com/concerns-about-research).

17 You will be given a copy of this form to keep.

18 A description of this clinical trial will be available on <http://www.ClinicalTrials.gov> as required by U.S. Law This Web  
19 site will not include information that can identify you. At most, the Web site will include a summary of the results.  
20 You can research this Web site at any time.

21 You are making a decision as to whether or not to participate. Your signature indicates that the above information  
22 has been reviewed with you and that you have decided to participate. You may withdraw at any time without  
23 prejudice after signing this form should you choose to discontinue participation in this study.

---

24 Signature:

25 \_\_\_\_\_

---

26 Date:

27 \_\_\_\_\_

---

28 Time:

29 \_\_\_\_\_

---

30 Upload a copy of informed consent here, if the  
31 participant chose to provide consent on paper

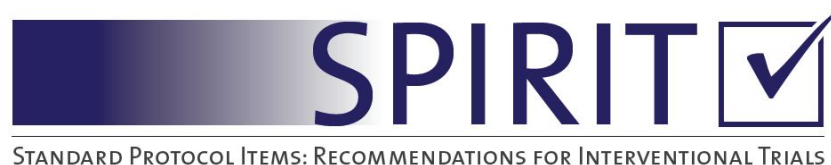

STANDARD PROTOCOL ITEMS: RECOMMENDATIONS FOR INTERVENTIONAL TRIALS

SPIRIT 2013 Checklist: Recommended items to address in a clinical trial protocol and related documents\*

| Section/item                      | Item No | Description                                                                                                                                                                                                                                                                              | Addressed on page number       |
|-----------------------------------|---------|------------------------------------------------------------------------------------------------------------------------------------------------------------------------------------------------------------------------------------------------------------------------------------------|--------------------------------|
| <b>Administrative information</b> |         |                                                                                                                                                                                                                                                                                          |                                |
| Title                             | 1       | Descriptive title identifying the study design, population, interventions, and, if applicable, trial acronym                                                                                                                                                                             | 1                              |
| Trial registration                | 2a      | Trial identifier and registry name. If not yet registered, name of intended registry                                                                                                                                                                                                     | 2                              |
|                                   | 2b      | All items from the World Health Organization Trial Registration Data Set                                                                                                                                                                                                                 | 1, 2, 3, 7, 8-10, 12-15-18, 20 |
| Protocol version                  | 3       | Date and version identifier                                                                                                                                                                                                                                                              | 2                              |
| Funding                           | 4       | Sources and types of financial, material, and other support                                                                                                                                                                                                                              | 2                              |
| Roles and responsibilities        | 5a      | Names, affiliations, and roles of protocol contributors                                                                                                                                                                                                                                  | 1, 19                          |
|                                   | 5b      | Name and contact information for the trial sponsor                                                                                                                                                                                                                                       | N/A                            |
|                                   | 5c      | Role of study sponsor and funders, if any, in study design; collection, management, analysis, and interpretation of data; writing of the report; and the decision to submit the report for publication, including whether they will have ultimate authority over any of these activities | 20                             |
|                                   | 5d      | Composition, roles, and responsibilities of the coordinating centre, steering committee, endpoint adjudication committee, data management team, and other individuals or groups overseeing the trial, if applicable (see Item 21a for data monitoring committee)                         | N/A                            |

1 **Introduction**

2

3 Background and rationale 6a Description of research question and justification for undertaking the trial, including summary of relevant studies (published and unpublished) examining benefits and harms for each intervention 4-5

4

5

6 6b Explanation for choice of comparators 4-5

7

8 Objectives 7 Specific objectives or hypotheses 5

9

10 Trial design 8 Description of trial design including type of trial (eg, parallel group, crossover, factorial, single group), allocation ratio, and framework (eg, superiority, equivalence, noninferiority, exploratory) 5-6

11

12

13

14 **Methods: Participants, interventions, and outcomes**

15

16 Study setting 9 Description of study settings (eg, community clinic, academic hospital) and list of countries where data will be collected. Reference to where list of study sites can be obtained 6

17

18

19 Eligibility criteria 10 Inclusion and exclusion criteria for participants. If applicable, eligibility criteria for study centres and individuals who will perform the interventions (eg, surgeons, psychotherapists) 6-7

20

21

22 Interventions 11a Interventions for each group with sufficient detail to allow replication, including how and when they will be administered 8-10

23

24

25 11b Criteria for discontinuing or modifying allocated interventions for a given trial participant (eg, drug dose change in response to harms, participant request, or improving/worsening disease) 11

26

27

28 11c Strategies to improve adherence to intervention protocols, and any procedures for monitoring adherence (eg, drug tablet return, laboratory tests) 11-12

29

30

31 11d Relevant concomitant care and interventions that are permitted or prohibited during the trial 6

32

33

34 Outcomes 12 Primary, secondary, and other outcomes, including the specific measurement variable (eg, systolic blood pressure), analysis metric (eg, change from baseline, final value, time to event), method of aggregation (eg, median, proportion), and time point for each outcome. Explanation of the clinical relevance of chosen efficacy and harm outcomes is strongly recommended 12-15

35

36

37

38

39

40 Participant timeline 13 Time schedule of enrolment, interventions (including any run-ins and washouts), assessments, and visits for participants. A schematic diagram is highly recommended (see Figure) 13 and Fig 1

41

42

43

44

45

46

1 Sample size 14 Estimated number of participants needed to achieve study objectives and how it was determined, including 7  
 2 clinical and statistical assumptions supporting any sample size calculations

3  
 4 Recruitment 15 Strategies for achieving adequate participant enrolment to reach target sample size 7  
 5

6  
 7 **Methods: Assignment of interventions (for controlled trials)**

8 Allocation:  
 9

10 Sequence 16a Method of generating the allocation sequence (eg, computer-generated random numbers), and list of any 8  
 11 generation factors for stratification. To reduce predictability of a random sequence, details of any planned restriction  
 12 (eg, blocking) should be provided in a separate document that is unavailable to those who enrol participants  
 13 or assign interventions  
 14  
 15

16 Allocation 16b Mechanism of implementing the allocation sequence (eg, central telephone; sequentially numbered, 8  
 17 concealment opaque, sealed envelopes), describing any steps to conceal the sequence until interventions are assigned  
 18 mechanism  
 19

20 Implementation 16c Who will generate the allocation sequence, who will enrol participants, and who will assign participants to 8  
 21 interventions  
 22  
 23

24 Blinding (masking) 17a Who will be blinded after assignment to interventions (eg, trial participants, care providers, outcome 9  
 25 assessors, data analysts), and how  
 26

27 17b If blinded, circumstances under which unblinding is permissible, and procedure for revealing a participant's 9  
 28 allocated intervention during the trial  
 29  
 30

31 **Methods: Data collection, management, and analysis**  
 32

33 Data collection 18a Plans for assessment and collection of outcome, baseline, and other trial data, including any related 12-15  
 34 methods processes to promote data quality (eg, duplicate measurements, training of assessors) and a description of  
 35 study instruments (eg, questionnaires, laboratory tests) along with their reliability and validity, if known.  
 36 Reference to where data collection forms can be found, if not in the protocol  
 37

38 18b Plans to promote participant retention and complete follow-up, including list of any outcome data to be 11-12  
 39 collected for participants who discontinue or deviate from intervention protocols  
 40  
 41  
 42



|    |                                 |     |                                                                                                                                                                                                                                                                                                                                       |       |
|----|---------------------------------|-----|---------------------------------------------------------------------------------------------------------------------------------------------------------------------------------------------------------------------------------------------------------------------------------------------------------------------------------------|-------|
| 1  | Data management                 | 19  | Plans for data entry, coding, security, and storage, including any related processes to promote data quality (eg, double data entry; range checks for data values). Reference to where details of data management procedures can be found, if not in the protocol                                                                     | 17-18 |
| 2  |                                 |     |                                                                                                                                                                                                                                                                                                                                       |       |
| 3  |                                 |     |                                                                                                                                                                                                                                                                                                                                       |       |
| 4  |                                 |     |                                                                                                                                                                                                                                                                                                                                       |       |
| 5  | Statistical methods             | 20a | Statistical methods for analysing primary and secondary outcomes. Reference to where other details of the statistical analysis plan can be found, if not in the protocol                                                                                                                                                              | 15-17 |
| 6  |                                 |     |                                                                                                                                                                                                                                                                                                                                       |       |
| 7  |                                 |     |                                                                                                                                                                                                                                                                                                                                       |       |
| 8  |                                 | 20b | Methods for any additional analyses (eg, subgroup and adjusted analyses)                                                                                                                                                                                                                                                              | 15-17 |
| 9  |                                 |     |                                                                                                                                                                                                                                                                                                                                       |       |
| 10 |                                 | 20c | Definition of analysis population relating to protocol non-adherence (eg, as randomised analysis), and any statistical methods to handle missing data (eg, multiple imputation)                                                                                                                                                       | 18    |
| 11 |                                 |     |                                                                                                                                                                                                                                                                                                                                       |       |
| 12 |                                 |     |                                                                                                                                                                                                                                                                                                                                       |       |
| 13 |                                 |     |                                                                                                                                                                                                                                                                                                                                       |       |
| 14 | <b>Methods: Monitoring</b>      |     |                                                                                                                                                                                                                                                                                                                                       |       |
| 15 |                                 |     |                                                                                                                                                                                                                                                                                                                                       |       |
| 16 | Data monitoring                 | 21a | Composition of data monitoring committee (DMC); summary of its role and reporting structure; statement of whether it is independent from the sponsor and competing interests; and reference to where further details about its charter can be found, if not in the protocol. Alternatively, an explanation of why a DMC is not needed | 18    |
| 17 |                                 |     |                                                                                                                                                                                                                                                                                                                                       |       |
| 18 |                                 |     |                                                                                                                                                                                                                                                                                                                                       |       |
| 19 |                                 |     |                                                                                                                                                                                                                                                                                                                                       |       |
| 20 |                                 |     |                                                                                                                                                                                                                                                                                                                                       |       |
| 21 |                                 |     |                                                                                                                                                                                                                                                                                                                                       |       |
| 22 |                                 | 21b | Description of any interim analyses and stopping guidelines, including who will have access to these interim results and make the final decision to terminate the trial                                                                                                                                                               | 18    |
| 23 |                                 |     |                                                                                                                                                                                                                                                                                                                                       |       |
| 24 |                                 |     |                                                                                                                                                                                                                                                                                                                                       |       |
| 25 | Harms                           | 22  | Plans for collecting, assessing, reporting, and managing solicited and spontaneously reported adverse events and other unintended effects of trial interventions or trial conduct                                                                                                                                                     | 18    |
| 26 |                                 |     |                                                                                                                                                                                                                                                                                                                                       |       |
| 27 |                                 |     |                                                                                                                                                                                                                                                                                                                                       |       |
| 28 |                                 | 23  | Frequency and procedures for auditing trial conduct, if any, and whether the process will be independent from investigators and the sponsor                                                                                                                                                                                           | 18    |
| 29 |                                 |     |                                                                                                                                                                                                                                                                                                                                       |       |
| 30 |                                 |     |                                                                                                                                                                                                                                                                                                                                       |       |
| 31 |                                 |     |                                                                                                                                                                                                                                                                                                                                       |       |
| 32 | <b>Ethics and dissemination</b> |     |                                                                                                                                                                                                                                                                                                                                       |       |
| 33 |                                 |     |                                                                                                                                                                                                                                                                                                                                       |       |
| 34 | Research ethics approval        | 24  | Plans for seeking research ethics committee/institutional review board (REC/IRB) approval                                                                                                                                                                                                                                             | 19    |
| 35 |                                 |     |                                                                                                                                                                                                                                                                                                                                       |       |
| 36 |                                 |     |                                                                                                                                                                                                                                                                                                                                       |       |
| 37 | Protocol amendments             | 25  | Plans for communicating important protocol modifications (eg, changes to eligibility criteria, outcomes, analyses) to relevant parties (eg, investigators, REC/IRBs, trial participants, trial registries, journals, regulators)                                                                                                      | 19    |
| 38 |                                 |     |                                                                                                                                                                                                                                                                                                                                       |       |
| 39 |                                 |     |                                                                                                                                                                                                                                                                                                                                       |       |
| 40 |                                 |     |                                                                                                                                                                                                                                                                                                                                       |       |
| 41 |                                 |     |                                                                                                                                                                                                                                                                                                                                       |       |
| 42 |                                 |     |                                                                                                                                                                                                                                                                                                                                       |       |

|    |                               |     |                                                                                                                                                                                                                                                                                     |                                                                                                    |
|----|-------------------------------|-----|-------------------------------------------------------------------------------------------------------------------------------------------------------------------------------------------------------------------------------------------------------------------------------------|----------------------------------------------------------------------------------------------------|
| 1  | Consent or assent             | 26a | Who will obtain informed consent or assent from potential trial participants or authorised surrogates, and how (see Item 32)                                                                                                                                                        | 10-11                                                                                              |
| 2  |                               |     |                                                                                                                                                                                                                                                                                     |                                                                                                    |
| 3  |                               |     |                                                                                                                                                                                                                                                                                     |                                                                                                    |
| 4  |                               | 26b | Additional consent provisions for collection and use of participant data and biological specimens in ancillary studies, if applicable                                                                                                                                               | N/A                                                                                                |
| 5  |                               |     |                                                                                                                                                                                                                                                                                     |                                                                                                    |
| 6  |                               |     |                                                                                                                                                                                                                                                                                     |                                                                                                    |
| 7  | Confidentiality               | 27  | How personal information about potential and enrolled participants will be collected, shared, and maintained in order to protect confidentiality before, during, and after the trial                                                                                                | 17-18                                                                                              |
| 8  |                               |     |                                                                                                                                                                                                                                                                                     |                                                                                                    |
| 9  |                               |     |                                                                                                                                                                                                                                                                                     |                                                                                                    |
| 10 | Declaration of interests      | 28  | Financial and other competing interests for principal investigators for the overall trial and each study site                                                                                                                                                                       | 20                                                                                                 |
| 11 |                               |     |                                                                                                                                                                                                                                                                                     |                                                                                                    |
| 12 |                               |     |                                                                                                                                                                                                                                                                                     |                                                                                                    |
| 13 | Access to data                | 29  | Statement of who will have access to the final trial dataset, and disclosure of contractual agreements that limit such access for investigators                                                                                                                                     | 17                                                                                                 |
| 14 |                               |     |                                                                                                                                                                                                                                                                                     |                                                                                                    |
| 15 |                               |     |                                                                                                                                                                                                                                                                                     |                                                                                                    |
| 16 | Ancillary and post-trial care | 30  | Provisions, if any, for ancillary and post-trial care, and for compensation to those who suffer harm from trial participation                                                                                                                                                       | no plans for post-trial care, compensation plan due to injury listed in ICF p2 "In Case of Injury" |
| 17 |                               |     |                                                                                                                                                                                                                                                                                     |                                                                                                    |
| 18 |                               |     |                                                                                                                                                                                                                                                                                     |                                                                                                    |
| 19 |                               |     |                                                                                                                                                                                                                                                                                     |                                                                                                    |
| 20 |                               |     |                                                                                                                                                                                                                                                                                     |                                                                                                    |
| 21 |                               |     |                                                                                                                                                                                                                                                                                     |                                                                                                    |
| 22 |                               |     |                                                                                                                                                                                                                                                                                     |                                                                                                    |
| 23 |                               |     |                                                                                                                                                                                                                                                                                     |                                                                                                    |
| 24 |                               |     |                                                                                                                                                                                                                                                                                     |                                                                                                    |
| 25 | Dissemination policy          | 31a | Plans for investigators and sponsor to communicate trial results to participants, healthcare professionals, the public, and other relevant groups (eg, via publication, reporting in results databases, or other data sharing arrangements), including any publication restrictions | 19                                                                                                 |
| 26 |                               |     |                                                                                                                                                                                                                                                                                     |                                                                                                    |
| 27 |                               |     |                                                                                                                                                                                                                                                                                     |                                                                                                    |
| 28 |                               |     |                                                                                                                                                                                                                                                                                     |                                                                                                    |
| 29 |                               | 31b | Authorship eligibility guidelines and any intended use of professional writers                                                                                                                                                                                                      | 19                                                                                                 |
| 30 |                               |     |                                                                                                                                                                                                                                                                                     |                                                                                                    |
| 31 |                               | 31c | Plans, if any, for granting public access to the full protocol, participant-level dataset, and statistical code                                                                                                                                                                     | 19                                                                                                 |
| 32 |                               |     |                                                                                                                                                                                                                                                                                     |                                                                                                    |
| 33 |                               |     |                                                                                                                                                                                                                                                                                     |                                                                                                    |
| 34 | <b>Appendices</b>             |     |                                                                                                                                                                                                                                                                                     |                                                                                                    |
| 35 |                               |     |                                                                                                                                                                                                                                                                                     |                                                                                                    |
| 36 | Informed consent materials    | 32  | Model consent form and other related documentation given to participants and authorised surrogates                                                                                                                                                                                  | supplemental                                                                                       |
| 37 |                               |     |                                                                                                                                                                                                                                                                                     |                                                                                                    |
| 38 |                               |     |                                                                                                                                                                                                                                                                                     |                                                                                                    |
| 39 | Biological specimens          | 33  | Plans for collection, laboratory evaluation, and storage of biological specimens for genetic or molecular analysis in the current trial and for future use in ancillary studies, if applicable                                                                                      | N/A                                                                                                |
| 40 |                               |     |                                                                                                                                                                                                                                                                                     |                                                                                                    |
| 41 |                               |     |                                                                                                                                                                                                                                                                                     |                                                                                                    |
| 42 |                               |     |                                                                                                                                                                                                                                                                                     |                                                                                                    |

1 \*It is strongly recommended that this checklist be read in conjunction with the SPIRIT 2013 Explanation & Elaboration for important clarification on the items.  
2 Amendments to the protocol should be tracked and dated. The SPIRIT checklist is copyrighted by the SPIRIT Group under the Creative Commons  
3 [“Attribution-NonCommercial-NoDerivs 3.0 Unported”](#) license.  
4  
5  
6  
7  
8  
9  
10  
11  
12  
13  
14  
15  
16  
17  
18  
19  
20  
21  
22  
23  
24  
25  
26  
27  
28  
29  
30  
31  
32  
33  
34  
35  
36  
37  
38  
39  
40  
41  
42  
43  
44  
45  
46

For peer review only

# BMJ Open

## Effects of a 12-week, seated, virtual, home-based tele-exercise program compared with a pre-recorded video-based exercise program in people with chronic neurological impairments: protocol for a randomized controlled trial

|                                 |                                                                                                                                                                                                                                                                                                                                                                          |
|---------------------------------|--------------------------------------------------------------------------------------------------------------------------------------------------------------------------------------------------------------------------------------------------------------------------------------------------------------------------------------------------------------------------|
| Journal:                        | <i>BMJ Open</i>                                                                                                                                                                                                                                                                                                                                                          |
| Manuscript ID                   | bmjopen-2022-065032.R2                                                                                                                                                                                                                                                                                                                                                   |
| Article Type:                   | Protocol                                                                                                                                                                                                                                                                                                                                                                 |
| Date Submitted by the Author:   | 14-Dec-2022                                                                                                                                                                                                                                                                                                                                                              |
| Complete List of Authors:       | Divecha, Ayushi A.; Burke Neurological Institute<br>Bialek, Amy; Burke Neurological Institute<br>Kumar, Devina S.; Burke Neurological Institute<br>Garn, Rachel; Burke Neurological Institute<br>Currie, Lydia; Burke Neurological Institute<br>Campos, Talita; Burke Neurological Institute<br>Friel, Kathleen M.; Burke Neurological Institute; Weill Cornell Medicine |
| <b>Primary Subject Heading</b>: | Sports and exercise medicine                                                                                                                                                                                                                                                                                                                                             |
| Secondary Subject Heading:      | Rehabilitation medicine                                                                                                                                                                                                                                                                                                                                                  |
| Keywords:                       | Rehabilitation medicine < INTERNAL MEDICINE, Neurology < INTERNAL MEDICINE, Telemedicine < BIOTECHNOLOGY & BIOINFORMATICS                                                                                                                                                                                                                                                |
|                                 |                                                                                                                                                                                                                                                                                                                                                                          |

SCHOLARONE™  
Manuscripts

1  
2  
3 **Effects of a 12-week, seated, virtual, home-based tele-exercise program**  
4 **compared with a pre-recorded video-based exercise program in people with**  
5 **chronic neurological impairments: protocol for a randomized controlled trial**  
6  
7  
8  
9  
10  
11  
12

13 Ayushi A. Divecha<sup>1</sup>, Amy Bialek<sup>1</sup>, Devina S. Kumar<sup>1</sup>, Rachel M. Garn<sup>1</sup>, Lydia E. J.  
14 Currie<sup>1</sup>, Talita Campos<sup>1</sup>, Kathleen M. Friel<sup>1,2</sup>  
15  
16  
17  
18  
19  
20

21 <sup>1</sup>Burke Neurological Institute, White Plains, NY and <sup>2</sup>Weill Cornell Medicine, New York,  
22 NY, USA  
23  
24  
25  
26  
27  
28

29 Correspondence to:  
30

31 Kathleen M. Friel, PhD  
32  
33

34 Clinical Laboratory for Early Brain Injury Recovery,  
35  
36

37 Burke Neurological Institute, White Plains, NY and  
38  
39

40 Weill Cornell Medicine, New York, NY, USA  
41  
42

43 Phone Number 914-368-3116  
44  
45

46 [kaf3001@med.cornell.edu](mailto:kaf3001@med.cornell.edu)  
47  
48

49 Word count: 4676  
50

51 Keywords: Tele-exercise, chronic neurological impairments, home-based, virtual  
52 training.  
53  
54  
55  
56  
57  
58  
59  
60

## Abstract

**Introduction:** Exercise is vital to staying well and preventing secondary complications in people with Chronic Neurological Impairments (CNI). Appropriate exercise is often inaccessible to this population. The purpose of the study is to investigate the effects of a seated, virtual exercise program on heart rate, recovery, fatigue, pain, motivation, enjoyment, and quality of life in people with CNI.

**Methods and analysis:** Individuals with CNI will be screened for eligibility, and 60 participants will be randomized 1:1 into either a live or pre-recorded group. There is no geographic limitation to where participants reside, since participation is virtual. The study will be coordinated by one site in White Plains, NY, USA. The live group will exercise with an instructor via Zoom while the pre-recorded group will exercise at their chosen time using pre-recorded videos, 3x/week for 12 weeks. Primary outcome measure: change in heart rate during exercise/recovery. Secondary outcome measures: fatigue, motivation, level of pain and exertion, physical well-being, enjoyment of physical activity, motivation, and quality of life. Outcomes will be assessed at baseline, midpoint, end of study, and one-month post-study. Adverse events, medication changes, and physical activity will be tracked throughout. Within-group and between-group comparisons will be performed using Analysis of Covariance and regression.

**Ethics and dissemination:** BRANY IRB approval: 09/22/2020, protocol #20-08-388-512. All participants will provide written informed consent. Results will be disseminated through presentations, publications, and [clinicaltrials.gov](https://clinicaltrials.gov).

**Trial registration number:** [ClinicalTrials.gov](https://clinicaltrials.gov), NCT04564495.

### Strengths and limitations of this study

- This study will use a comprehensive set of physiological and behavioral assessments to assess effects of exercise.
- The virtual design of the study enables people to participate without commuting to our institute.
- For those participants with limited technological experience, difficulty using blood pressure devices and heart rate monitors will cause missing data values.
- The virtual design of the study prohibits hands-on evaluations.

## Introduction

Exercise is a vital component to staying well and preventing secondary impairments. Exercise is known to positively influence a range of factors including cardiovascular health, cognition, mental health, bone health, sleep, and quality of life, among many others<sup>1-8</sup>. The benefits of exercise are further amplified in the estimated one billion people worldwide with Chronic (> 6 months) Neurological Impairments (CNI), as the injuries often lead to sedentary lifestyles and thus higher rates of obesity and cardiovascular disease<sup>9-11</sup>. Incorporating an exercise regimen is vital to preventing secondary complications such as muscular weakness, fatigue, limited mobility, pain, spasticity, bone loss, and increased risk of fractures, falls, diabetes, depression, and obesity<sup>7, 8, 12, 13</sup>. Exercise can be neuroprotective and neuro-regenerative by increasing neurotrophic factors, which are involved in neuroprotection, neuroplasticity, and maintenance of neuronal health<sup>2, 14-18</sup>. Exercise can also improve muscle strength and bone integrity in people with CNI<sup>19-21</sup>.

People with CNI often cannot access community exercise centers, as mobility can be more difficult, insurance payments sparse, centers not welcoming or accessible, and assistive exercise equipment too costly for most facilities<sup>22-35</sup>.

Another key barrier to exercise for people with CNI is transportation<sup>36</sup>. Although COVID-19 introduced many new barriers to community participation, it also had some silver linings for people with CNI. COVID-19 resulted in the emergence of many new Zoom or online classes tailored to people with CNI, which removed the barrier of transportation.

Although there has been an explosion of virtual-based exercise opportunities since 2020, much is unknown regarding optimal delivery models to bring exercise to people



1  
2  
3 with CNI. Two general types of virtual exercise delivery models exist. In synchronous  
4 exercise, one or more participants join a virtual space via videoconferencing, and  
5 interact with the trainer in real time. Synchronous exercise enables the trainer to provide  
6 feedback as participants exercise. In contrast, in asynchronous exercise, trainers record  
7 instructional videos, which participants complete on their own time, without being in the  
8 same virtual space with the trainer at the same time. Asynchronous exercise provides  
9 scheduling flexibility to participants but does not allow for real time interaction and  
10 feedback from the trainer. There has only been one study directly comparing  
11 synchronous versus asynchronous exercise training in people with CNI.  
12  
13  
14  
15  
16  
17  
18  
19  
20  
21  
22  
23

24 In a recent study, forty adults with spinal cord injury were randomized to either  
25 synchronous or asynchronous tele-exercise. While there was no significant difference in  
26 average daily workload between the interventions, the synchronous tele-exercise found  
27 significantly higher values for adherence and successful data recording of the exercise,  
28 resulting in greater weekly training loads<sup>37</sup>. Virtual exercise platforms are part of society  
29 even as the pandemic wanes. Thus, it is important to determine optimal delivery models  
30 for specific groups of participants.  
31  
32  
33  
34  
35  
36  
37  
38  
39  
40

41 This study will examine the cardiovascular benefits, as well as differences in  
42 compliance, motivation and feelings of socialization and exertion between synchronous  
43 and asynchronous classes. The classes will be held for 12 weeks, 3 times/week using  
44 seated exercise via Zoom. The instructor will remain the same and alternate between  
45 boxing, high intensity interval training (HIIT) and power posture classes. We will  
46 examine the potential benefits of an accessible form of exercise for a population that is  
47  
48  
49  
50  
51  
52  
53  
54  
55  
56  
57  
58  
59  
60

1  
2  
3 in urgent need. Additionally, by comparing synchronous and asynchronous classes, we  
4  
5 will compare user compliance, motivation, enjoyment, and socialization.  
6  
7

8 We hypothesize that individuals in the synchronous class will have better attendance,  
9  
10 more robust exertion as measured by heart rate, and better enjoyment than people in  
11  
12 the asynchronous class, due to the social component of the synchronous classes. We  
13  
14 hypothesize that participants in both groups will show improvement in heart rate  
15  
16 recovery, physical wellness, quality of life, enjoyment, and motivation/engagement, and  
17  
18 that changes will be greater in the synchronous class due to consistent supervision and  
19  
20 contact.  
21  
22  
23  
24  
25  
26  
27

## 28 **Methods and analysis**

### 29 **Study design**

30  
31  
32  
33 This study is a parallel randomized controlled trial to investigate the effects of a 12-  
34  
35 week, 3 times/week, seated tele-exercise program for adults with CNI (Figure 1). All 36  
36  
37 exercise sessions will be completed online via Zoom with the physical exercise  
38  
39 instructor (live, synchronous group) or offline using recorded videos (pre-recorded,  
40  
41 asynchronous group). Participants will be in their own homes as they complete the  
42  
43 exercise classes. Participants can continue their medications, physical, occupational,  
44  
45 speech therapies, and existing exercise routines (2 times/week or fewer).  
46  
47  
48  
49  
50  
51  
52

### 53 **Eligibility criteria and participants**

54  
55 The eligibility criteria will be kept broad to accommodate all neurological impairments.  
56  
57  
58  
59  
60

1  
2  
3 Inclusion criteria:  
4  
5

- 6 1. Participants diagnosed with Chronic (>6 months) Neurological Impairments
- 7
- 8 2. Ages 18 to 75 years
- 9
- 10 3. Able to sit for at least 1 hour
- 11
- 12 4. Stable Heart rate (HR) and Blood Pressure (BP)
- 13
- 14 5. Medical clearance to participate in moderate intensity exercises
- 15
- 16 6. Can don and doff a wrist HR monitor with or without assistance
- 17
- 18 7. Can maintain daily exercise and physical activity during the study
- 19
- 20 8. No other neurological, medical or cognitive impairments
- 21
- 22 9. Able to access the internet and use the cloud-based Zoom conference platform
- 23
- 24 10. Ability to speak and understand English
- 25
- 26 11. Currently exercising 2 days or less per week
- 27
- 28 12. Presence of caregiver or supervisor during exercise, for safety
- 29
- 30
- 31
- 32
- 33

34 Exclusion criteria:  
35  
36

- 37 1. Unstable or uncontrolled medical conditions
- 38
- 39 2. Medical issues preventing safe participation
- 40
- 41 3. Unable to follow simple 2-step commands
- 42
- 43
- 44
- 45
- 46

47 **Number of participants**  
48

49 We plan to conduct multiple cohorts of participants, each with different participant  
50 populations, e.g., multiple sclerosis, cerebral palsy, stroke, spinal cord injury.  
51  
52  
53  
54  
55  
56  
57  
58  
59  
60

1  
2  
3 For each cohort, with 27 participants in the synchronous and asynchronous groups, we  
4 will have 80% power to detect a change in maximum heart rate during exercise from  
5 about 80 bpm to 100 bpm (or greater), from the first session to the last session of the  
6 intervention. This calculation assumes a conservative standard deviation of the pre/post  
7 differences in heart rate of 35 bpm. We plan for a 30% dropout rate, which is an  
8 estimate based on our feasibility pilot study (see below), which means that we will  
9 recruit 35 participants per group to achieve 80% power.  
10  
11  
12  
13  
14  
15  
16  
17  
18  
19  
20  
21  
22

## 23 **Recruitment**

24  
25 Participants will be recruited via the Sabrina Cohen Foundation (SCF), which has a  
26 network of people with CNI, and by the Burke Neurological Institute (BNI), who has a  
27 database of potential participants from prior studies or programs. We will also post our  
28 recruitment flier on our website, social media, and will mail it to neurological patient  
29 advocacy groups. We will send the study flier to all above mentioned entities, without  
30 prioritizing any database or group over another. If we cannot recruit appropriate  
31 numbers using these methods, we will pursue paid advertising in our community.  
32  
33  
34  
35  
36  
37  
38  
39  
40  
41  
42  
43  
44

## 45 **Randomization**

46  
47 A person not affiliated with the study will generate a series of permuted randomized  
48 blocks in a computerized spreadsheet with a defined block size of 4. Participants will be  
49 allocated to either the live (synchronous) or pre-recorded (asynchronous) group, with a  
50 1:1 ratio between groups. Due to the nature of the intervention, it is not possible to  
51  
52  
53  
54  
55  
56  
57  
58  
59  
60

1  
2  
3 conceal allocation from the participants or the study team. However, the two groups will  
4  
5 never interact with one another.  
6  
7  
8  
9

### 10 11 **Blinding and rigor of data** 12

13  
14 Due to the nature of the study, blinding of participants and study team members to  
15  
16 group allocation will not be possible. All participants will complete the outcome surveys  
17  
18 directly online, without input or assistance from the study team. Heart rate data will be  
19  
20 collected through a heart rate monitor that collects quantitative data without input or  
21  
22 filtering by the study team.  
23  
24  
25  
26  
27

### 28 29 **Intervention** 30

31  
32 The exercise intervention will be delivered by a trained professional who specializes in  
33  
34 adaptive exercise for individuals with CNI. The instructor will structure each class to  
35  
36 ensure standardization in terms of class structure, including warm-up, cool-down, cues  
37  
38 for recording heart rate during class, use of additional equipment, and adherence to the  
39  
40 general study protocol. The instructor has extensive experience in offering adaptations  
41  
42 to exercises in a virtual setting. He offers alternative ways to perform the exercises,  
43  
44 such that everyone in class will be able to fully participate safely.  
45  
46  
47

48  
49 All participants, regardless of allocation to live or pre-recorded groups, will participate in  
50  
51 45 minutes of aerobic exercise intervention, three times a week, for a period of 12  
52  
53 weeks. The overall exercise session will be up to one hour long to include measuring  
54  
55 vitals, answering questions before/after sessions, and rest breaks (if any). Two  
56  
57  
58  
59  
60

additional weeks will be provided for making up missed sessions, if applicable. Each intervention will be preceded by a warm-up and followed by a cool-down period. All participants will be asked to document any adverse events and changes in medications before each session. The order of classes will be rotated. Individual aerobic interventions for the first cohort are described below and summarized in Table 1.

**Table 1: Summary of exercise sessions**

| Minutes into Session | HIIT                                                                  | Boxing                                                                       | Power Posture                                 |
|----------------------|-----------------------------------------------------------------------|------------------------------------------------------------------------------|-----------------------------------------------|
| 5                    | Warm up                                                               | Warm up                                                                      | Warm up                                       |
| 10                   | Intervals of 30 sec high intensity movements, 1-2 min lower intensity | Intervals of 30 sec high intensity boxing movements, 1-2 min lower intensity | Stretching                                    |
| 15                   |                                                                       |                                                                              | Fast paced movements targeting trunk, posture |
| 20                   |                                                                       |                                                                              | Stretching                                    |
| 25                   |                                                                       |                                                                              |                                               |
| 30                   |                                                                       |                                                                              |                                               |
| 35                   | Cool down                                                             | Cool down                                                                    | Cool down                                     |
| 40                   |                                                                       |                                                                              |                                               |
| 45                   | End                                                                   | End                                                                          | End                                           |

High intensity interval training (HIIT): In HIIT sessions, participants will do repetitive bouts of high intensity exercises, with intermittent periods of rest or active recovery. Examples of high intensity movements used in these sessions include fast punching movements, repeatedly rapidly lifting one's arms overhead (with or without weights, as tolerated by each participant), and abdominal crunches. The duration of each bout of high intensity is about 10-30 seconds. Since this study will include participants with variable neurological impairments, the upper limit of exercise intensity in HIIT will be

1  
2  
3 dependent on instructor's judgement, participant feedback, rate of perceived exertion,  
4  
5 and any exercise heart rate restrictions given by their doctor in the medical screening.  
6  
7

8 Boxing: In boxing sessions, participants will do a circuit of individual and combinations  
9  
10 of various arm strikes and punches. Boxing is a moderate to high intensity aerobic  
11  
12 activity by nature. During the session, participants will do bouts of high intensity  
13  
14 movements, similar to HIIT, along with periods of lower intensity arm movements such  
15  
16 as practicing defensive blocks of punches from an imaginary boxing opponent. The  
17  
18 exercise intensity for boxing, as in HIIT, will be subjective for participants based on level  
19  
20 of perceived exertion as well as exercise heart rate restrictions, if any.  
21  
22  
23

24 Power posture: Power posture is a HIIT-style strength and endurance class in which  
25  
26 participants will move in ways that train trunk stability and control of sitting with correct  
27  
28 posture. In these sessions, there will be a warm-up period of 5-10 minutes, focused on  
29  
30 slow, gentle repetitions to prepare the trapezius and other supporting scapular muscles  
31  
32 for movement. This workout will target postural form, with fast paced targeted  
33  
34 movements for 10-15 minutes. After the fast-paced movements, a cool-down period will  
35  
36 focus on gentle deep neck flexor/extensor chin tuck exercises, range of motion, and  
37  
38 stretching.  
39  
40  
41  
42  
43  
44  
45  
46

### 47 **Virtual nature of the study**

48  
49 Each aspect of this study will be performed virtually. Screenings will be performed on  
50  
51 the telephone, with a standard list of criteria asked of each person. If deemed eligible,  
52  
53 the potential participant will be sent a Zoom link to go through the informed consent on  
54  
55  
56  
57  
58  
59  
60

1  
2  
3 a one-to-one basis. The informed consent will be uploaded to REDCap, a secure web  
4 application for building and managing online surveys and databases. REDCap is 21  
5 CFR Part 11-ready and HIPAA compliant and is specifically geared to support online  
6 and offline data capture for research studies and operations.  
7  
8  
9  
10

11  
12 To obtain informed consent directly from participants, a study team member will arrange  
13 a Zoom call with each participant. The informed consent will be signed virtually by  
14 sharing a virtual remote with the participant during the call. If anyone has difficulty, they  
15 can be sent the informed consent from REDCap via email and return it to REDCap just  
16 as easily. Each participant will be sent a copy of their signed consent form via the same  
17 REDCap email system (see Supplemental Material for a sample consent form).  
18  
19  
20  
21  
22  
23  
24  
25

26  
27 Each participant will be mailed a home exercise kit, which will contain a Polar optical  
28 heart rate monitor (OH1), blood pressure monitor, yellow and green resistance  
29 TheraBands and wrist weights.  
30  
31  
32  
33

34 After the home kits have been received by the participants and before the intervention  
35 begins, we will hold a series of training videoconferencing calls to acquaint participants  
36 with the study procedures and the use of all devices.  
37  
38  
39  
40  
41

42 *Polar OH1 heart rate monitor:* we will train participants in donning/doffing the heart rate  
43 monitor, using the Polar app, using their Polar accounts, syncing the Polar devices with  
44 their smartphones and starting/ending their heart rate tracking during exercise sessions.  
45  
46  
47  
48

49 *Blood pressure monitor:* we will send each participant a commercially available  
50 automatic blood pressure (BP) monitor. We will train each person to use it, and we have  
51  
52  
53  
54  
55  
56  
57  
58  
59  
60



1  
2  
3 embedded an instructional video into the REDCap data entry form on which participants  
4  
5 will input their BP.  
6  
7

8 *Checking compliance:* after each session, a study team member will review each  
9  
10 participant's data entry forms and syncing of their heart rate data with the Polar app.  
11  
12 For the synchronous group, this will occur before the participant leaves the session. For  
13  
14 the asynchronous group, this will occur within one day of when the participant  
15  
16 completes the session.  
17  
18

19  
20 All questionnaires and questions to be answered before and after each class will be  
21  
22 sent from and stored on REDCap. All heart rate data will be transmitted to the Polar  
23  
24 website, which can be accessed only by the participant or the researchers. Then, the  
25  
26 data will be analyzed in MATLAB using custom scripts written by the study team.  
27  
28  
29  
30  
31  
32

### 33 **Study safety**

34  
35 We will monitor side effects before and after each session by having participants  
36  
37 complete surveys on REDCap. If pain or blood pressure are higher than usual, we will  
38  
39 ask the participant if they wish to continue. If blood pressure rises near limitations  
40  
41 prescribed by a participant's doctor, we will discontinue the participant. If any injury  
42  
43 occurs during or outside of study sessions that may increase the risk of further injury,  
44  
45 we will discontinue the participant.  
46  
47  
48  
49  
50  
51

### 52 **Patient and public involvement**

53  
54  
55  
56  
57  
58  
59  
60

1  
2  
3 Persons with disabilities were involved in the design of this study, and will be involved in  
4 the conduct, reporting, and dissemination plans of this research. Our pilot study  
5 participants provided constructive feedback on the study, in surveys and in a zoom  
6 discussion group after they completed the study. Our class instructor owns and  
7 operated an adaptive gym for people with disabilities, and received feedback from his  
8 clients when designing the exercise classes. We will continue to involve these people as  
9 we complete the study, through regular meetings and surveys.  
10  
11  
12  
13  
14  
15  
16  
17  
18  
19  
20  
21

### 22 **Strategies to improve adherence**

23  
24  
25 In this study, adherence is defined as the number of sessions a participant completed.  
26  
27 The study team will take attendance at each synchronous session and will monitor  
28 session completions for the asynchronous group. Completion for the asynchronous  
29 group will be monitored via REDCap. Each time a person completes a data entry form  
30 before and after the session, it will be automatically saved and time stamped in  
31 REDCap.  
32  
33  
34  
35  
36  
37  
38  
39

40 If a participant misses a class, we will reach out and inquire about their ability to attend  
41 future sessions. We have *a priori* set a minimum number of 30 of 36 classes that a  
42 participant must attend to be included in the main analyses of the study. We will offer 2  
43 weeks of makeup sessions at the end of the 12 weeks. If a participant drops out before  
44 completing 30 sessions, we will encourage them to complete the post-study outcome  
45 measures and the satisfaction survey. We will use the number of sessions completed as  
46 a covariate in the analyses.  
47  
48  
49  
50  
51  
52  
53  
54  
55  
56  
57  
58  
59  
60

## Outcome measures

All outcome measures are summarized in Table 2.

**Table 2: Outcome measures**

| <b>PRIMARY OUTCOME MEASURE</b>    |                            |                                |                               |
|-----------------------------------|----------------------------|--------------------------------|-------------------------------|
| <b>Measure</b>                    | <b>Modality Assessed</b>   | <b>Method of Ascertainment</b> | <b>Timepoints</b>             |
| <b>Peak heart rate</b>            | Cardiovascular function    | Polar OH1/Polar Beat app       | Each session                  |
| <b>SECONDARY OUTCOME MEASURES</b> |                            |                                |                               |
| <b>Measure</b>                    | <b>Modality Assessed</b>   | <b>Method of Ascertainment</b> | <b>Timepoints</b>             |
| Demographics                      | --                         | REDCap survey                  | Before first session          |
| Attendance                        | Adherence                  | REDCap time stamps             | Each session                  |
| Baseline heart rate               | Cardiovascular function    | Polar OH1/Polar Beat app       | Each session                  |
| Heart rate at end of session      | Cardiovascular function    | Polar OH1/Polar Beat app       | Each session                  |
| Heart rate recovery               | Cardiovascular function    | Polar OH1/Polar Beat app       | Each session                  |
| Blood pressure                    | Cardiovascular function    | Automatic BP device            | Before and after each session |
| Rate of Perceived Exertion        | Cardiopulmonary fitness    | REDCap survey                  | Before and after each session |
| Perceived Wellness Survey         | Wellness                   | REDCap survey                  | Baseline, weeks 6, 12, 16     |
| Physical Activity Enjoyment Scale | Enjoyment of exercise      | REDCap survey                  | Baseline, weeks 6, 12, 16     |
| Short Form-36                     | Physical and mental health | REDCap survey                  | Baseline, weeks 6, 12, 16     |
| Numerical Pain Rating Scale       | Pain                       | REDCap survey                  | Baseline, weeks 6, 12, 16     |

|                               |                          |               |                            |
|-------------------------------|--------------------------|---------------|----------------------------|
| Reason for Exercise Inventory | Motivation to exercise   | REDCap survey | Baseline, weeks 6, 12, 16  |
| Participant Feedback Survey   | Participant satisfaction | REDCap survey | End of study or at dropout |

## Demographics

We will collect the following demographics by having each participant complete a demographics data entry form on REDCap: age, gender, neurological diagnosis, time of diagnosis, and comorbid health issues (e.g., diabetes, high blood pressure, etc.). We will also document whether a person needs assistance with walking or transfers. In addition, we will require each participant to receive written medical clearance by their doctor to participate in the study, and if any exercise restrictions need to be followed.

## Primary outcome measure: peak heart rate during exercise

Continuous heart rate tracking is the primary outcome measure for the study. All participants will receive the OH1 Polar HR monitor as part of their exercise kit for the study (Figure 2). The Polar OH1 (Polar Electro Inc., Bethpage, NY, USA) is an optical heart rate sensor on an armband that records HR activity. It has 6 LED sensors that record at 1-second intervals<sup>38</sup>. HR activity is recorded via Bluetooth to a phone compatible with the Polar Flow or Polar Beat app. It has validity in moderate to vigorous intensity exercises and high endurance sports activities<sup>38-40</sup>.

1  
2  
3 Immediately before each exercise session, participants will turn on their OH1 monitor.  
4  
5 Then, the participant will open the Polar Beat app on their smart phone and hit “start”  
6  
7 when the exercise session begins. The Polar OH1 continuously records heart rate (HR)  
8  
9 at 10Hz when the device is powered on and the Polar Beat app recording has been  
10  
11 started. Participants will record HR through the entire exercise session and for 10  
12  
13 minutes after completion of the session to capture HR during exercise as well as HR  
14  
15 recovery for 10 minutes after the end of exercise sessions. The live group will be  
16  
17 supervised by the research team for each session. The pre-recorded groups will have  
18  
19 the research team available for assistance and troubleshooting. Data are stored on the  
20  
21 Polar Coach website, where study staff can export sessions as CSV files that are then  
22  
23 processed in MATLAB (MathWorks). In MATLAB, peak HR (primary measure) will be  
24  
25 calculated.  
26  
27  
28  
29  
30

## 31 **Secondary outcome measures**

### 32 *Measures acquired at each exercise session*

33  
34 We will calculate secondary measures of HR in MATLAB using the same Polar CSV  
35  
36 files mentioned above: baseline HR, HR at end of session, and HR at 30s intervals for  
37  
38 10min after the end of the session will be analyzed, to measure heart rate recovery.  
39  
40  
41  
42  
43

44 At each session, participants will complete an online assessment to rate the level of  
45  
46 pain and perceived exertion (RPE), BP, HR, and adverse events before and after the  
47  
48 exercise session. Additionally, as described above, attendance will be taken at each  
49  
50 session as a measure of adherence. After the session is over, participants will complete  
51  
52 a lab-developed survey to rate their experience on a 10-point scale from 1 (not a good  
53  
54 experience) to 10 (very good experience) on questions related to motivation, energy,  
55  
56  
57  
58  
59  
60

1  
2  
3 satisfaction, and performance. In addition, participants will provide information on  
4  
5 changes related to health, falls, or other adverse events.  
6  
7

### 8 *Measures acquired at specified times during the intervention*

9

10  
11 A comprehensive set of secondary outcome measures will be completed by participants  
12  
13 at baseline, mid-study (6 weeks), end of study (12 weeks) and follow-up after one  
14  
15 month. All questionnaires will be self-administered or administered by a trained  
16  
17 researcher virtually using REDCap.  
18  
19

20  
21 Perceived Wellness Survey (PWS): Participants will quantify their perceived health  
22  
23 status by completing the PWS. The PWS is a 36-item instrument used to measure an  
24  
25 individual's perceived health status in physical, psychological, emotional, intellectual,  
26  
27 spiritual, and social wellness constructs. Items under each construct are scored on a  
28  
29 scale of 1 (very strongly disagree) to 6 (very strongly agree). Higher scores indicate  
30  
31 better perceived wellness. The PWS has good reliability and validity in healthy and  
32  
33 neurological populations<sup>41-43</sup>.  
34  
35  
36

37  
38 Physical Activity Enjoyment Scale (PACES): the PACES is a self-assessment measure  
39  
40 of enjoyment with their current physical activity. It is an 18-item scale with scoring from  
41  
42 1 (I enjoy it) to 7 (I hate it). Scores on the bipolar rating scale are summed with higher  
43  
44 scores indicative of more enjoyment. It is reliable and valid in neurological populations<sup>44-</sup>  
45  
46 <sup>47</sup>.  
47  
48

49  
50 Short Form-36 Health Survey (SF-36): the SF-36 measures physical health and mental  
51  
52 health. There are eight scales - Physical Functioning, Physical Role Limitations, Bodily  
53  
54 Pain, General Health, Vitality, Social Functioning, Emotional Role Limitations, and  
55  
56  
57  
58  
59

1  
2  
3 Mental Health. It is easy to use with good validity and reliability in neurological  
4  
5 populations<sup>48-51</sup>.

6  
7  
8 Numerical pain rating (NPR) scale: the NPR is a standardized instrument for pain  
9  
10 assessment in clinical and research practice. It is an 11-point scale from 0 (no pain) to  
11  
12 10 (the most intense pain) at rest and during movement. It is simple to use with high  
13  
14 sensitivity to changes in chronic pain in adult populations<sup>52, 53</sup>. It is reliable and valid for  
15  
16 pain assessments of neurological populations<sup>54</sup>.

17  
18  
19 Borg's Rating Scale of Perceived Exertion (RPE): the Borg RPE is a widely used  
20  
21 standardized measure to evaluate perceived intensity of exertion, effort, and fatigue  
22  
23 during physical exercise. The scale ranges from 6 (no exertion at all) to 20 (absolute  
24  
25 maximum). Higher ratings on the scale indicate greater overall body exertion. It is a  
26  
27 reliable and valid measure in neurological populations<sup>55-62</sup>.

28  
29  
30 Reason for exercise inventory (REI): the REI is a 24-item scale to assess the reason  
31  
32 that motivates a person to exercise. The modified version has 4 subscales:  
33  
34 Weight/appearance management, fitness/health management, stress/emotion  
35  
36 management, and socialization. A 7-point scale ranges from 1 (not at all important) to 7  
37  
38 (extremely important). Higher scores represent greater motivation to exercise<sup>63</sup>.

39  
40  
41 Participant feedback: on study completion, or when withdrawn/dropped out from the  
42  
43 study, participants will complete a study feedback form. The feedback will be based on  
44  
45 study acceptance, ease of using HR and BP devices and exercise equipment, and  
46  
47 support from the research team. Participants who do not complete the study will also  
48  
49 provide their final timepoint measure at the end of their final exercise session.  
50  
51  
52  
53  
54  
55  
56  
57  
58  
59  
60

## Statistical methods

Descriptive statistics (including mean, standard deviation, median, interquartile range, frequency, and percent) will be calculated for demographic and clinical characteristics of the study participants.. Analysis of Covariance (ANCOVA) will be used to evaluate the independent effect of synchronous versus asynchronous group status on change in peak heart rate (first session versus final session), after controlling for baseline heart rate and any other factors that may remain imbalanced between groups after randomization. Adjusted mean differences in peak heart rate (first session versus final session) between the synchronous and asynchronous groups and 95% confidence intervals for these differences will be estimated from the multivariable ANCOVA model. Similar analyses as described above will be performed for other continuous outcomes (primary and secondary), including Borg's RPE scale, mood, motivation, and pain scales, Perceived Wellness Survey, SF-36v2 score, and PACES score. Categorical variables (e.g., safety questions, adverse events, medication changes, etc.) will be compared between the synchronous and asynchronous groups (at baseline, 6 weeks, and 12 weeks) by the chi-square test or Fisher's exact test, as appropriate. Generalized estimating equations (GEE) modeling will also be explored to evaluate between-group differences over repeated assessments, and to account for potential missing data in some of the outcome variables at one or more of the evaluation time points. All estimates from the multivariable models will serve as preliminary data (i.e., hypothesis-generating) for future studies. All p-values will be two-sided with statistical significance evaluated at the 0.05 alpha level. Ninety-five percent confidence intervals for all



1  
2  
3 parameters of interest will be calculated to assess the precision of the obtained  
4 estimates. All analyses will be performed in R and SPSS by a person blinded to  
5 treatment allocation.  
6  
7  
8  
9

## 10 11 12 13 **Data management**

14  
15  
16 Participant identifying information will be kept confidential by providing a unique  
17 identification number (ID number) for the course of the study. To maintain privacy, only  
18 authorized research investigators involved in the study will have access to participant  
19 information. Password protected laptops, online documents, and access to cloud-based  
20 servers will prevent leaks in data privacy. All records including informed consent,  
21 screening tools, medical records, and participant surveys will be completed, and  
22 documented on REDCap, a HIPAA-compliant online research database.  
23  
24  
25  
26  
27  
28  
29

30  
31  
32 Privacy on Zoom platform: Our institutional Zoom account (through Weill Cornell  
33 Medicine) is compliant with HIPAA guidelines. Participant profile names will be updated  
34 to display their ID. After each session, the recorded video will be uploaded to the  
35 password protected WCM cloud-based server. Respective group participants will be  
36 given the live Zoom links (synchronous) or passwords to access the asynchronous  
37 Zoom sessions.  
38  
39  
40  
41  
42  
43  
44  
45

46  
47 Polar OH1 HR monitor (Optical HR sensor): Participants' profiles using allotted ID's will  
48 be created in the Polar Beat App and the Flow for Coach cloud-based online platform.  
49 All information uploaded to the platform will be accessible by the investigators using a  
50 secured login ID and password.  
51  
52  
53  
54  
55  
56  
57  
58  
59  
60

1  
2  
3 Adverse events, change in medications, and protocol deviation will be documented and  
4 updated before and after each class on REDCap. The study team will perform weekly  
5 self-audits to ensure data quality and completeness.  
6  
7  
8

### 9 10 *Procedure for handling missing data*

11  
12  
13 This study is an intention-to-treat trial. If data are missing, we will use a mixed linear  
14 regression model that accounts for uneven numbers of data points across participants.  
15  
16  
17

### 18 19 20 21 **Data monitoring and stopping rules**

22  
23  
24 Since this is a low-risk study, our IRB determined that a data monitoring committee is  
25 not necessary. We will audit our data weekly and assess safety data at each session. If  
26 we find an increase in pain by 25% or a decrease in quality of life measures by 25%  
27 across participants in a cohort, we will pause the trial and evaluate how to improve the  
28 safety of the study.  
29  
30  
31  
32  
33  
34  
35  
36  
37  
38

### 39 40 41 **Current status of the study**

42 We have performed a feasibility cohort, with people with a range of abilities and  
43 diagnoses. The first participant was consented on 01/22/2021, for an intervention that  
44 began on 03/24/2021 and ended on 06/28/2021. In this feasibility study, we determined  
45 that participants could readily complete the online assessments, exercise sessions, and  
46 could effectively use Zoom, the Polar OH1 sensor and Polar Beat app, and the blood  
47 pressure measurement device. Our next step will be to enroll separate cohorts of  
48  
49  
50  
51  
52  
53  
54  
55  
56  
57  
58  
59  
60

1  
2  
3 people with specific neurological diagnoses, such as cerebral palsy, stroke, and multiple  
4  
5 sclerosis. This will begin in 2023.  
6  
7  
8  
9

### 10 11 **Resource sharing plan**

12  
13 We plan to use the concept, methods and analysis as a framework to develop evidence-  
14 based protocols for future cohorts and studies. We have made a commitment to publish  
15  
16 all relevant scientific information in a timely manner. Unpublished information may be  
17  
18 available to interested individuals or organizations by request to the Principal  
19  
20 Investigator.  
21  
22  
23  
24  
25  
26  
27

### 28 29 **Ethics and dissemination**

30  
31 The study was approved by the BRANY Institutional Review Board on 9/22/2020,  
32  
33 protocol #20-08-388-512. All study participants will provide written informed consent  
34  
35 before participation. All protocol deviations, adverse events, and protocol modifications  
36  
37 will be reported to the IRB immediately. The results of the study will be disseminated to  
38  
39 the academic community via publications and presentations. The deidentified study data  
40  
41 will be shared on our laboratory website. The trial is registered at Clinicaltrials.gov,  
42  
43 number NCT04564495.  
44  
45  
46  
47  
48  
49  
50  
51  
52  
53  
54  
55  
56  
57  
58  
59  
60

1  
2  
3 **Acknowledgements:** We thank the Sabrina Cohen Foundation for funding and for  
4  
5 commitment to assist with study development and recruitment. We thank Devon  
6  
7 Palermo at DPI Adaptive Fitness who will serve as the adaptive fitness instructor for this  
8  
9 study.  
10

11  
12 **Contributors:** KMF is the Principal Investigator. KMF, AAD and AB were responsible  
13  
14 for ethics applications and reporting. AAD, AB, DSK, RMG, LEJC, TAC and KMF  
15  
16 drafted the final version of this manuscript. All authors have contributed to the writing  
17  
18 and critical review of the manuscript and have approved the final version.  
19  
20

21  
22 **Funding:** This work is supported by funding from the Sabrina Cohen Foundation and  
23  
24 the Burke Foundation. This work is supported by grant number UL1 TR 002384 from the  
25  
26 National Center for Advancing Translational Sciences (NCATS) of the National  
27  
28 Institutes of Health (NIH). The Sabrina Cohen Foundation has established the tele-  
29  
30 exercise classes we are studying and will assist with recruitment. The Sabrina Cohen  
31  
32 Foundation and Burke Foundation will have no role in data collection, analyses,  
33  
34 interpretation, or publication of the work.  
35  
36  
37

38  
39 **Competing interests:** None to declare.  
40  
41  
42  
43  
44  
45  
46  
47  
48  
49  
50  
51  
52  
53  
54  
55  
56  
57  
58  
59  
60

## References

1. Gkatzamanis V, Magriplis E, Panagiotakos D. The effect of physical activity interventions on cognitive function of older adults: A systematic review of clinical trials. *Psychiatriki*. 2022.
2. Johansson ME, Cameron IGM, Van der Kolk NM, de Vries NM, Klimars E, Toni I, et al. Aerobic Exercise Alters Brain Function and Structure in Parkinson's Disease: A Randomized Controlled Trial. *Ann Neurol*. 2022;91(2):203-16.
3. Li Q, Wu C. Social Interaction, Lifestyle, and Depressive Status: Mediators in the Longitudinal Relationship between Cognitive Function and Instrumental Activities of Daily Living Disability among Older Adults. *Int J Environ Res Public Health*. 2022;19(7).
4. Minto LR, Ellis R, Cherry KE, Wood RH, Barber SJ, Carter S, et al. Impact of cardiovascular risk factors on the relationships of physical activity with mood and cognitive function in a diverse sample. *Neuropsychol Dev Cogn B Aging Neuropsychol Cogn*. 2022:1-14.
5. Rosado H, Bravo J, Raimundo A, Carvalho J, Marmeleira J, Pereira C. Effects of two 24-week multimodal exercise programs on reaction time, mobility, and dual-task performance in community-dwelling older adults at risk of falling: a randomized controlled trial. *BMC Public Health*. 2021;21(Suppl 2):408.
6. Schuch FB, Vancampfort D, Firth J, Rosenbaum S, Ward PB, Silva ES, et al. Physical Activity and Incident Depression: A Meta-Analysis of Prospective Cohort Studies. *Am J Psychiatry*. 2018;175(7):631-48.

- 1  
2  
3 7. Yang PY, Ho KH, Chen HC, Chien MY. Exercise training improves sleep quality  
4 in middle-aged and older adults with sleep problems: a systematic review. *J Physiother.*  
5  
6 2012;58(3):157-63.  
7
- 8  
9 8. Yuan Y, Chen X, Zhang L, Wu J, Guo J, Zou D, et al. The roles of exercise in  
10 bone remodeling and in prevention and treatment of osteoporosis. *Prog Biophys Mol*  
11  
12 *Biol.* 2016;122(2):122-30.  
13  
14
- 15 9. Moore SA, Flynn D, Jones S, Price CIM, Avery L. Feasibility, acceptability, and  
16 fidelity of Physical Activity Routines After Stroke (PARAS): a multifaceted behaviour  
17 change intervention targeting free-living physical activity and sedentary behaviour in  
18 community-dwelling adult stroke survivors. *Pilot Feasibility Stud.* 2022;8(1):197.  
19  
20  
21  
22  
23  
24
- 25 10. Ryan JM, Allen E, Gormley J, Hurvitz EA, Peterson MD. The risk, burden, and  
26 management of non-communicable diseases in cerebral palsy: a scoping review. *Dev*  
27  
28 *Med Child Neurol.* 2018;60(8):753-64.  
29  
30  
31
- 32 11. Zwierzchowska A, Rosolek B, Sikora M, Celebanska D. Forced Sedentariness  
33 and Sports Activity as Factors Differentiating Anthropometric Characteristics, Indices,  
34 and Body Composition in People with Disabilities. *Biology (Basel).* 2022;11(6).  
35  
36  
37  
38
- 39 12. Jasinska-Mikolajczyk A, Drews K, Domaszewska K, Kolasa G, Konofalska M,  
40 Jowik K, et al. The Effect of Physical Activity on Neurotrophin Concentrations and  
41 Cognitive Control in Patients With a Depressive Episode. *Front Psychiatry.*  
42  
43 2022;13:777394.  
44  
45  
46  
47
- 48 13. Lampousi AM, Berglind D, Forsell Y. Association of changes in cardiorespiratory  
49 fitness with health-related quality of life in young adults with mobility disability:  
50  
51  
52  
53  
54  
55  
56  
57  
58  
59  
60

- 1  
2  
3 secondary analysis of a randomized controlled trial of mobile app versus supervised  
4 training. BMC Public Health. 2020;20(1):1721.  
5  
6  
7  
8 14. Dimyan MA, Cohen LG. Neuroplasticity in the context of motor rehabilitation after  
9 stroke. Nat Rev Neurol. 2011;7(2):76-85.  
10  
11  
12 15. Knaepen K, Goekint M, Heyman EM, Meeusen R. Neuroplasticity - exercise-  
13 induced response of peripheral brain-derived neurotrophic factor: a systematic review of  
14 experimental studies in human subjects. Sports Med. 2010;40(9):765-801.  
15  
16  
17 16. Li C, Ke C, Su Y, Wan C. Exercise Intervention Promotes the Growth of  
18 Synapses and Regulates Neuroplasticity in Rats With Ischemic Stroke Through  
19 Exosomes. Front Neurol. 2021;12:752595.  
20  
21  
22 17. Penna LG, Pinheiro JP, Ramalho SHR, Ribeiro CF. Effects of aerobic physical  
23 exercise on neuroplasticity after stroke: systematic review. Arq Neuropsiquiatr.  
24 2021;79(9):832-43.  
25  
26  
27 18. Phillips C. Lifestyle Modulators of Neuroplasticity: How Physical Activity, Mental  
28 Engagement, and Diet Promote Cognitive Health during Aging. Neural Plast.  
29 2017;2017:3589271.  
30  
31  
32 19. Legerlotz K. The Effects of Resistance Training on Health of Children and  
33 Adolescents With Disabilities. Am J Lifestyle Med. 2020;14(4):382-96.  
34  
35  
36 20. O'Connell ML, Coppinger T, McCarthy AL. The role of nutrition and physical  
37 activity in frailty: A review. Clin Nutr ESPEN. 2020;35:1-11.  
38  
39  
40 21. van der Scheer JW, Martin Ginis KA, Ditor DS, Goosey-Tolfrey VL, Hicks AL,  
41 West CR, et al. Effects of exercise on fitness and health of adults with spinal cord injury:  
42 A systematic review. Neurology. 2017;89(7):736-45.  
43  
44  
45  
46  
47  
48  
49  
50  
51  
52  
53  
54  
55  
56  
57  
58  
59  
60

- 1  
2  
3 22. Fleming KM, Herring MP, Coote SB, Tindall D. Participant experiences of eight  
4 weeks of supervised or home-based Pilates among people with multiple sclerosis: a  
5 qualitative analysis. *Disabil Rehabil*. 2021:1-8.  
6  
7  
8  
9  
10 23. Forgea MC, Lyons AG, Lorenz RA. Barriers and Facilitators to Engagement in  
11 Rehabilitation Among Stroke Survivors: An Integrative Review. *Rehabil Nurs*.  
12 2021;46(6):340-7.  
13  
14  
15  
16  
17 24. Giroux EE, Casemore S, Clarke TY, McBride CB, Wuerstl KR, Gainforth HL.  
18 Enhancing participation while aging with spinal cord injury: applying behaviour change  
19 frameworks to develop intervention recommendations. *Spinal Cord*. 2021;59(6):665-74.  
20  
21  
22  
23  
24 25. Hickingbotham MR, Wong CJ, Bowling AB. Barriers and facilitators to physical  
25 education, sport, and physical activity program participation among children and  
26 adolescents with psychiatric disorders: a systematic review. *Transl Behav Med*.  
27 2021;11(9):1739-50.  
28  
29  
30  
31  
32  
33 26. Karssemeijer EGA, de Klijn FH, Bossers WJR, Olde Rikkert MGM, van Heuvelen  
34 MJG. Ranking Barriers, Motivators, and Facilitators to Promote Physical Activity  
35 Participation of Persons With Dementia: An Explorative Study. *J Geriatr Phys Ther*.  
36 2020;43(2):71-81.  
37  
38  
39  
40  
41  
42 27. Keramat SA, Ahammed B, Mohammed A, Seidu AA, Farjana F, Hashmi R, et al.  
43 Disability, physical activity, and health-related quality of life in Australian adults: An  
44 investigation using 19 waves of a longitudinal cohort. *PLoS One*. 2022;17(5):e0268304.  
45  
46  
47  
48  
49 28. Kirk TN, Haegele JA, Zhu X. Barriers, Expectancy-Value Beliefs, and Physical  
50 Activity Engagement Among Adults With Visual Impairments. *Adapt Phys Activ Q*.  
51 2021;38(2):286-306.  
52  
53  
54  
55  
56  
57  
58  
59  
60



- 1  
2  
3 29. Lindsay RK, Carmichael C, Allen PM, Fossey M, Godier-McBard L, Butler L, et  
4 al. Fishing Participation, Motivators and Barriers among UK Anglers with Disabilities:  
5 Opportunities and Implications for Green Social Prescribing. *Int J Environ Res Public*  
6 *Health*. 2022;19(8).  
7  
8  
9  
10  
11  
12 30. McDermott G, Brick NE, Shannon S, Fitzpatrick B, Taggart L. Barriers and  
13 facilitators of physical activity in adolescents with intellectual disabilities: An analysis  
14 informed by the COM-B model. *J Appl Res Intellect Disabil*. 2022;35(3):800-25.  
15  
16  
17  
18  
19 31. McKenzie G, Willis C, Shields N. Barriers and facilitators of physical activity  
20 participation for young people and adults with childhood-onset physical disability: a  
21 mixed methods systematic review. *Dev Med Child Neurol*. 2021;63(8):914-24.  
22  
23  
24  
25  
26 32. Nightingale TE, Heneghan NR, Fenton SAM, Veldhuijzen van Zanten J, Jutzeler  
27 CR. Physical Activity and Health-Related Quality of Life in Adults With a Neurologically-  
28 Related Mobility Disability During the COVID-19 Pandemic: An Exploratory Analysis.  
29 *Front Neurol*. 2021;12:699884.  
30  
31  
32  
33  
34  
35 33. Pedersen MRL, Hansen AF, Elmoose-Osterlund K. Motives and Barriers Related  
36 to Physical Activity and Sport across Social Backgrounds: Implications for Health  
37 Promotion. *Int J Environ Res Public Health*. 2021;18(11).  
38  
39  
40  
41  
42 34. Pinto SM, Newman MA, Hirsch MA. Perceived Barriers to Exercise in Adults with  
43 Traumatic Brain Injury Vary by Age. *J Funct Morphol Kinesiol*. 2018;3(3).  
44  
45  
46  
47 35. Porteny T, Alegria M, Del Cueto P, Fuentes L, Markle SL, NeMoyer A, et al.  
48 Barriers and strategies for implementing community-based interventions with minority  
49 elders: positive minds-strong bodies. *Implement Sci Commun*. 2020;1:41.  
50  
51  
52  
53  
54  
55  
56  
57  
58  
59  
60

- 1  
2  
3 36. Schootemeijer S, van der Kolk NM, Ellis T, Mirelman A, Nieuwboer A, Nieuwhof  
4 F, et al. Barriers and Motivators to Engage in Exercise for Persons with Parkinson's  
5 Disease. *J Parkinsons Dis*. 2020;10(4):1293-9.  
6  
7  
8  
9  
10 37. Costa RRG, Dorneles JR, Veloso JH, Goncalves CW, Neto FR. Synchronous  
11 and asynchronous tele-exercise during the coronavirus disease 2019 pandemic:  
12 Comparisons of implementation and training load in individuals with spinal cord injury. *J*  
13 *Telemed Telecare*. 2021:1357633X20982732.  
14  
15  
16  
17  
18  
19 38. Hermand E, Cassirame J, Ennequin G, Hue O. Validation of a  
20 Photoplethysmographic Heart Rate Monitor: Polar OH1. *Int J Sports Med*.  
21 2019;40(7):462-7.  
22  
23  
24  
25  
26 39. Hettiarachchi IT, Hanoun S, Nahavandi D, Nahavandi S. Validation of Polar OH1  
27 optical heart rate sensor for moderate and high intensity physical activities. *PLoS One*.  
28 2019;14(5):e0217288.  
29  
30  
31  
32  
33 40. Schubert MM, Clark A, De La Rosa AB. The Polar ® OH1 Optical Heart Rate  
34 Sensor is Valid during Moderate-Vigorous Exercise. *Sports Med Int Open*.  
35 2018;2(3):E67-E70.  
36  
37  
38  
39  
40 41. Hamdani Y, Yee T, Oake M, McPherson AC. Multi-stakeholder perspectives on  
41 perceived wellness of Special Olympics athletes. *Disabil Health J*. 2019;12(3):422-30.  
42  
43  
44  
45 42. Kaveh MH, Ostovarfar J, Keshavarzi S, Ghahremani L. Validation of Perceived  
46 Wellness Survey (PWS) in a Sample of Iranian Population. *Malays J Med Sci*.  
47 2016;23(4):46-53.  
48  
49  
50  
51 43. Sekiguchi Y, Curtis RM, Huggins RA, Benjamin CL, Walker AJ, Arent SM, et al.  
52 The Relationships Between Perceived Wellness, Sleep, and Acute: Chronic Training  
53  
54  
55  
56  
57  
58  
59  
60

1  
2  
3 Load in National Collegiate Athletics Association Division I Male Soccer Players. *J*  
4  
5 *Strength Cond Res.* 2021;35(5):1326-30.

6  
7  
8 44. Jekauc D, Voelkle M, Wagner MO, Mewes N, Woll A. Reliability, validity, and  
9  
10 measurement invariance of the German version of the physical activity enjoyment scale.  
11  
12 *J Pediatr Psychol.* 2013;38(1):104-15.

13  
14  
15 45. Mullen SP, Olson EA, Phillips SM, Szabo AN, Wojcicki TR, Mailey EL, et al.  
16  
17 Measuring enjoyment of physical activity in older adults: invariance of the physical  
18  
19 activity enjoyment scale (paces) across groups and time. *Int J Behav Nutr Phys Act.*  
20  
21 2011;8:103.

22  
23  
24 46. Murrock CJ, Bekhet A, Zauszniewski JA. Psychometric Evaluation of the  
25  
26 Physical Activity Enjoyment Scale in Adults with Functional Limitations. *Issues Ment*  
27  
28 *Health Nurs.* 2016;37(3):164-71.

29  
30  
31 47. Teques P, Calmeiro L, Silva C, Borrego C. Validation and adaptation of the  
32  
33 Physical Activity Enjoyment Scale (PACES) in fitness group exercisers. *J Sport Health*  
34  
35 *Sci.* 2020;9(4):352-7.

36  
37  
38 48. Anderson C, Laubscher S, Burns R. Validation of the Short Form 36 (SF-36)  
39  
40 health survey questionnaire among stroke patients. *Stroke.* 1996;27(10):1812-6.

41  
42  
43 49. Knox SA, King MT. Validation and calibration of the SF-36 health transition  
44  
45 question against an external criterion of clinical change in health status. *Qual Life Res.*  
46  
47 2009;18(5):637-45.

48  
49  
50 50. Rotstein Z, Barak Y, Noy S, Achiron A. Quality of life in multiple sclerosis:  
51  
52 development and validation of the 'RAYS' scale and comparison with the SF-36. *Int J*  
53  
54 *Qual Health Care.* 2000;12(6):511-7.

- 1  
2  
3 51. Wan C, Tu X, Messing S, Li X, Yang Z, Zhao X, et al. Development and  
4 validation of the general module of the system of quality of life instruments for chronic  
5 diseases and its comparison with SF-36. *J Pain Symptom Manage*. 2011;42(1):93-104.  
6  
7  
8  
9  
10 52. Farrar JT, Young JP, Jr., LaMoreaux L, Werth JL, Poole MR. Clinical importance  
11 of changes in chronic pain intensity measured on an 11-point numerical pain rating  
12 scale. *Pain*. 2001;94(2):149-58.  
13  
14  
15  
16  
17 53. Turk DC, Rudy TE, Sorkin BA. Neglected topics in chronic pain treatment  
18 outcome studies: determination of success. *Pain*. 1993;53(1):3-16.  
19  
20  
21 54. Farrar JT, Troxel AB, Stott C, Duncombe P, Jensen MP. Validity, reliability, and  
22 clinical importance of change in a 0-10 numeric rating scale measure of spasticity: a  
23 post hoc analysis of a randomized, double-blind, placebo-controlled trial. *Clin Ther*.  
24 2008;30(5):974-85.  
25  
26  
27  
28  
29  
30 55. Abadie BR. Effect of viewing the RPE scale on the ability to make ratings of  
31 perceived exertion. *Percept Mot Skills*. 1996;83(1):317-8.  
32  
33  
34  
35 56. Chung PK, Zhao Y, Liu JD, Quach B. A Brief Note on the Validity and Reliability  
36 of the Rating of Perceived Exertion Scale in Monitoring Exercise Intensity among  
37 Chinese Older Adults in Hong Kong. *Percept Mot Skills*. 2015;121(3):805-9.  
38  
39  
40  
41  
42 57. Compagnat M, Salle JY, Mandigout S, Lacroix J, Vuillerme N, Daviet JC. Rating  
43 of perceived exertion with Borg scale in stroke over two common activities of the daily  
44 living. *Top Stroke Rehabil*. 2018;25(2):145-9.  
45  
46  
47  
48  
49 58. Morishita S, Tsubaki A, Hotta K, Kojima S, Sato D, Shirayama A, et al.  
50 Relationship Between the Borg Scale Rating of Perceived Exertion and Leg-Muscle  
51  
52  
53  
54  
55  
56  
57  
58  
59  
60

1  
2  
3 Deoxygenation During Incremental Exercise in Healthy Adults. *Adv Exp Med Biol.*  
4  
5 2021;1269:95-9.  
6

7  
8 59. Morishita S, Tsubaki A, Nashimoto S, Fu JB, Onishi H. Face scale rating of  
9  
10 perceived exertion during cardiopulmonary exercise test. *BMJ Open Sport Exerc Med.*  
11  
12 2018;4(1):e000474.  
13

14  
15 60. Morishita S, Tsubaki A, Takabayashi T, Fu JB. Relationship between the rating of  
16  
17 perceived exertion scale and the load intensity of resistance training. *Strength Cond J.*  
18  
19 2018;40(2):94-109.  
20

21  
22 61. Penko AL, Barkley JE, Koop MM, Alberts JL. Borg scale is valid for ratings of  
23  
24 perceived exertion for individuals with Parkinson's disease. *Int J Exerc Sci.*  
25  
26 2017;10(1):76-86.  
27

28  
29 62. Skinner JS, Hutsler R, Bergsteinova V, Buskirk ER. The validity and reliability of  
30  
31 a rating scale of perceived exertion. *Med Sci Sports.* 1973;5(2):94-6.  
32

33  
34 63. Cash TF, Now PL, Grant JR. Why Do Women Exercise? Factor Analysis and  
35  
36 Further Validation of the Reasons for Exercise Inventory. *Percept Mot Skills.*  
37  
38 1994;78(2):539-44.  
39

## Figure legends

### Figure 1: Study flow diagram

### Figure 2: Polar OH1 heart rate monitor

A. Picture of the monitor and charger. B. Proper placement of the monitor, with the device on the forearm. C. The Polar Beat app on a smart phone streams data in real time from the OH1 monitor via Bluetooth. D. After a session, data are retrievable from the Polar Coach website, where it is exported to a CSV file and processed in MATLAB.

1  
2  
3  
4  
5  
6  
7  
8  
9  
10  
11  
12  
13  
14  
15  
16  
17  
18  
19  
20  
21  
22  
23  
24  
25  
26  
27  
28  
29  
30  
31  
32  
33  
34  
35  
36  
37  
38  
39  
40  
41  
42  
43  
44  
45  
46  
47  
48  
49  
50  
51  
52  
53  
54  
55  
56  
57  
58  
59  
60



Study flow diagram.

254x168mm (300 x 300 DPI)

1  
2  
3  
4  
5  
6  
7  
8  
9  
10  
11  
12  
13  
14  
15  
16  
17  
18  
19  
20  
21  
22  
23  
24  
25  
26  
27  
28  
29  
30  
31  
32  
33  
34  
35  
36  
37  
38  
39  
40  
41  
42  
43  
44  
45  
46  
47  
48  
49  
50  
51  
52  
53  
54  
55  
56  
57  
58  
59  
60

**A**



**B**



**C**



**D**



Polar OH1 Heart Rate monitor. A. Picture of the monitor and charger. B. Proper placement of the monitor, with the device on the forearm. C. The Polar Beat app on a smart phone streams data in real time from the OH1 monitor via Bluetooth. D. After a session, data are retrievable from the Polar Coach website, where it is exported to a CSV file and processed in MATLAB.

254x212mm (300 x 300 DPI)



# Informed Consent Form

This form explains our study and asks you to agree to participate. Please read the form carefully. A member of our study team will talk with you over Zoom to explain the study. Thank you so much for your interest in our study!

---

BIOMEDICAL RESEARCH ALLIANCE OF NEW YORK  
THE BURKE NEUROLOGICAL INSTITUTE

## SUBJECT INFORMATION AND INFORMED CONSENT

Project Title: Home-Based Exercise for People with Chronic Neurological Impairments  
Principal Investigator: Kathleen Friel, PhD  
Institution Name: Burke Neurological Institute  
Institution Address: 785 Mamaroneck Ave, White Plains, NY 10605  
Telephone: 914-368-3116, 646-351-9063 (24 hour)  
Protocol # TELEX

---

## ABOUT VOLUNTEERING FOR THIS RESEARCH STUDY

You are invited to participate in a research study. The purpose of the study is to determine the effect of a home-based exercise program on cardiovascular fitness and your quality of life. We will assess your motivation, enjoyment and compliance to either a live or pre recorded exercise class on Zoom.

You are eligible for this study because you have a neurological impairment that you've had for at least six months. A neurological impairment is weakness in your arms and/or legs that was caused by a stroke, brain injury, spinal cord injury, or any other condition that affects your brain or spinal cord.

---

## WHY IS THIS STUDY BEING DONE?

Scientists at The Burke Neurological Institute (BNI) are partnering with the Sabrina Cohen Foundation (SCF) to test whether a home-based exercise program can improve cardiovascular health and quality of life in people who have had a chronic neurological impairment. We designed this study after the onset of COVID-19 in the United States. Since COVID-19 limits accessibility to gyms and other types of exercise venues, we hope to learn and understand the physiological and behavioral aspects of this rehabilitation strategy to optimize wellness after a neurological injury. You were selected as a possible participant in this study because you've had a neurological impairment for at least six months.

---

## WHAT WILL I DO IF I AGREE TO BE IN THIS STUDY?

If you agree to be in the study, you will participate in 36 at-home, Zoom-based exercise classes. Classes will be held three times a week, for twelve weeks. You will be randomized to either a live class with other video participants, or a pre-recorded class that you will take on your own.

Before the first class, we will review your medical history with you to be sure it is safe for you to be in the study. If you qualify for the study, we will send you a kit that contains items you will need for the study, including a heart rate monitor, blood pressure cuff and adjustable wrist weights. We will also send you some surveys that ask about your ability to do everyday activities, such as dressing and cooking.

After you receive your home exercise kit, we will have an orientation Zoom class. You will meet the other people in the exercise class. During the orientation, the study team will teach you how to use the heart rate monitor. If you cannot put on the heart rate monitor, we will ask that a caregiver be present to assist you during each class.

You will download one applications onto your phone or computer that will allow us to access the information from your heart rate monitor. No one but the research team will be able to see this information aside from you.

Each exercise class will take approximately one hour. Each session will begin with instructions and questions from the study team regarding your pain level, level of motivation, and blood pressure. The exercise portion of the class will take 45 minutes. At the end of the class, the study team will ask you additional questions, such as how hard you worked, pain level, level of motivation and blood pressure.

The class instructor will tailor exercises to different abilities, so everyone can be active and safe. The entire class will be done in a seated position.

1 Approximately 100 people will be enrolled in the live class, and 100 in the pre-recorded class.  
2

3 After the 18th class, which is midway through the study, we will send you another set of the same surveys you  
4 completed before the first class. We will send you a third set of surveys after the final class.  
5

---

#### 6 RISKS AND INCONVENIENCES OF THE STUDY

7 Your participation in the project might involve the following risks:  
8

9 The largest risk in this study is the risk of fatigue and muscle aches. These symptoms are common with exercise. The  
10 instructor will offer modifications of each exercise, to offer easier or more difficult options. You will always be  
11 welcome to use a modification, request an additional modification, or rest.  
12

13 The risk of fall in this study is small, since you will be seated. If you normally have trouble with stability of your torso  
14 while you are seated, we will ask that a caregiver be present in case a fall occurs.  
15

16 There is a risk that your personal health information be disclosed in error. For this study, we are using secure Zoom  
17 settings from an academic medical center, and we will require a password for each class, to mitigate this risk. The  
18 app containing your heart rate information will also be secure.  
19

---

#### 20 PERMISSION FOR PHOTOGRAPHY

21 We will record each live class, video and audio. Since we are not together in one space, we need to record each  
22 class for purposes of data collection. Therefore, we require each participant to agree to being recorded. We want to  
23 make sure that you understand this.  
24

---

25 Do you agree to be photographed in this study?

- 26  Yes  
27  No  
28

---

29 Please initial here to confirm your choice about being  
30 photographed during the study:  
31

32 \_\_\_\_\_  
33

---

#### 34 NEW INFORMATION

35 You will be told about any new significant findings developed during the course of the study that might affect your  
36 willingness to continue in the research.  
37

---

#### 38 COST OF STUDY TO PARTICIPANTS

39 There is no cost to you for participating in the research study.  
40

---

#### 41 BENEFITS OF THIS STUDY

42 Participation in this study is not guaranteed to benefit you. This study is only for the purpose of research. You may  
43 feel stronger by the end of the study, but there is no guarantee that this will occur. However, the information learned  
44 from this study may help other people in the future.  
45

---

#### 46 ALTERNATIVES TO STUDY PARTICIPATION

47 You do not have to participate in this research study to receive treatment for your condition. Your participation in  
48 this study is voluntary. If you decide to participate, you are free to discontinue participation at any time. Your  
49 participation in this study may be terminated without your consent by the study team or regulatory authorities, in  
50 certain circumstances, such as, if the investigator determines it is in your best interest, you cannot adhere to the  
51 study procedures, or in the event the study is terminated.  
52

---

#### 53 IN CASE OF INJURY

54 In accordance with Federal regulation, we are obligated to inform you about our policy in the event injury occurs. For  
55 medical emergencies, call 911. If, as a result of your participation, you experience injury from known or unknown  
56 risks of the research procedures as described, emergency medical care and treatment will be provided on our  
57 premises to the extent possible. We will assist you in obtaining additional medical care, as needed, but you will be  
58 responsible for the costs of such further medical treatment, either directly or through your medical insurance and/or  
59 other forms of medical coverage. No other compensation will be offered by or Burke Neurological Institute or the  
60 Biomedical Research Alliance of New York. Further information can be obtained from Dr Kathleen Friel (914  
368-3116). You are not waiving any legal right to seek additional compensation through the courts by signing this  
form.

## CONFIDENTIALITY

To the extent allowed by law, every effort will be made to keep your personal information confidential. However, information from this study will be submitted to the study sponsor and to the U.S. Food and Drug Administration. It may be submitted to governmental agencies in other countries where the study product may be considered for approval. Medical records, which identify you and the consent form signed by you, will be looked at by the sponsor or the sponsor's representatives and may be looked at by the FDA and other regulatory agencies, the Institutional Review Board, and the Biomedical Research Alliance of New York. While these parties are aware of the need to keep your information confidential, total confidentiality cannot be guaranteed. The results of this research project may be presented at meetings or in publications; however, you will not be identified in these presentations and/or publications.

Federal regulations give you certain rights related to your health information. These include the right to know who will be able to get the information and why they may be able to get it. The study doctor must get your authorization (permission) to use or give out any health information that might identify you. If you choose to be in this study, the study doctor will get personal information about you. This may include information that might identify you. The study doctor may also get information about your health, including:

- Past and present medical records
- Research records
- Records about phone calls made as part of this research
- Records about your study visits
- Information obtained during this research about laboratory test results
- Results from diagnostic and medical procedures including but not limited to X-rays, physical examinations and medical history
- Billing records

Information about your health may be used and given to others by the study doctor and staff. They might see the research information during and after the study. Your information may be given to the sponsor of this research. "Sponsor" includes any persons or companies that are working for or with the sponsor, or are owned by the sponsor. Information about you and your health which might identify you may be given to:

- The U.S. Food and Drug Administration
- Department of Health and Human Services agencies
- Governmental agencies in other countries
- Biomedical Research Alliance of New York (BRANY)
- The Institutional Review Board
- Accrediting agencies

Your personal health information may be further shared by the groups above. If shared by them, the information will no longer be covered by the U.S. federal privacy laws. However, these groups are committed to keeping your personal health information confidential. If you give permission to give your identifiable health information to a person or business, the information may no longer be protected. There is a risk that your information will be released to others without your permission.

Information about you and your health that might identify you may be given to others to carry out the research study. The sponsor will analyze and evaluate the results of the study. In addition, people from the sponsor and its consultants will be visiting the research site. They will follow how the study is done, and they will be reviewing your information for this purpose. The information may be given to the FDA. It may also be given to governmental agencies in other countries. This is done so the sponsor can receive marketing approval for new products resulting from this research. The information may also be used to meet the reporting requirements of governmental agencies.

This authorization does not have an expiration date. If you do not withdraw this authorization in writing, it will remain in effect indefinitely.

By signing this consent form, you are giving permission to use and give out the health information listed above for the purposes described above. You do not have to sign this consent form. If you choose not to sign this consent form, you will not be able to be in this research study. Your decision not to sign this consent form will not have any effect on your medical care and you will not lose any benefits or legal rights to which you are entitled. You have the right to review and copy your health information. However, if you decide to be in this study and sign this permission form, you may not be allowed to look at or copy your information until after the research is completed.

You may withdraw or take away your permission to use and disclose your health information at any time. You do this by sending written notice to the study doctor at the address on the front of this informed consent form. If you withdraw your permission, you will not be able to continue being in this study, but you will not have any penalty or loss of access to treatment or other benefits to which you are entitled. When you withdraw your permission, no new health information which might identify you will be gathered after that date. Information that has already been gathered may still be used and given to others. This would be done if it were necessary for the research to be reliable.

1 Notice Concerning HIV-Related Information: HIV-related information that either is collected as part of the research or  
2 that may already exist in your medical record might be accessed for the research by the research staff and the study  
3 sponsor, but will not be shared with others without your authorization, unless federal or state law requires the  
4 disclosure. You have a right to request a list of people who may receive or use your HIV-related information without  
5 authorization. If you experience discrimination because of the release or disclosure of HIV-related information, you  
6 may contact the New York State Division of Human Rights or New York City Commission on Human Rights. These  
7 agencies are responsible for protecting your rights.

---

#### 8 QUESTIONS ABOUT THIS STUDY

9 If you have any questions or requests for information relating to this research study or your participation in it, or if  
10 you want to voice a complaint or concern about this research, or if you have a study related injury, you may contact  
11 Dr. Friel at 914-368-3116, 646-351-9063 (24 hour).

12 If you have any questions about your rights as a research subject or complaints regarding this research study, or you  
13 are unable to reach the research staff, you may contact a person independent of the research team at the  
14 Biomedical Research Alliance of New York Institutional Review Board at 516-318-6877. Questions, concerns or  
15 complaints about research can also be registered with the Biomedical Research Alliance of New York Institutional  
16 Review Board at [www.branyirb.com/concerns-about-research](http://www.branyirb.com/concerns-about-research).

17 You will be given a copy of this form to keep.

18 A description of this clinical trial will be available on <http://www.ClinicalTrials.gov> as required by U.S. Law This Web  
19 site will not include information that can identify you. At most, the Web site will include a summary of the results.  
20 You can research this Web site at any time.

21 You are making a decision as to whether or not to participate. Your signature indicates that the above information  
22 has been reviewed with you and that you have decided to participate. You may withdraw at any time without  
23 prejudice after signing this form should you choose to discontinue participation in this study.

24 Signature:

25 \_\_\_\_\_

26 Date:

27 \_\_\_\_\_

28 Time:

29 \_\_\_\_\_

30 Upload a copy of informed consent here, if the  
31 participant chose to provide consent on paper



STANDARD PROTOCOL ITEMS: RECOMMENDATIONS FOR INTERVENTIONAL TRIALS

SPIRIT 2013 Checklist: Recommended items to address in a clinical trial protocol and related documents\*

| Section/item                      | Item No | Description                                                                                                                                                                                                                                                                              | Addressed on page number       |
|-----------------------------------|---------|------------------------------------------------------------------------------------------------------------------------------------------------------------------------------------------------------------------------------------------------------------------------------------------|--------------------------------|
| <b>Administrative information</b> |         |                                                                                                                                                                                                                                                                                          |                                |
| Title                             | 1       | Descriptive title identifying the study design, population, interventions, and, if applicable, trial acronym                                                                                                                                                                             | 1                              |
| Trial registration                | 2a      | Trial identifier and registry name. If not yet registered, name of intended registry                                                                                                                                                                                                     | 2                              |
|                                   | 2b      | All items from the World Health Organization Trial Registration Data Set                                                                                                                                                                                                                 | 1, 2, 3, 7, 8-10, 12-15-18, 20 |
| Protocol version                  | 3       | Date and version identifier                                                                                                                                                                                                                                                              | 2                              |
| Funding                           | 4       | Sources and types of financial, material, and other support                                                                                                                                                                                                                              | 2                              |
| Roles and responsibilities        | 5a      | Names, affiliations, and roles of protocol contributors                                                                                                                                                                                                                                  | 1, 19                          |
|                                   | 5b      | Name and contact information for the trial sponsor                                                                                                                                                                                                                                       | N/A                            |
|                                   | 5c      | Role of study sponsor and funders, if any, in study design; collection, management, analysis, and interpretation of data; writing of the report; and the decision to submit the report for publication, including whether they will have ultimate authority over any of these activities | 20                             |
|                                   | 5d      | Composition, roles, and responsibilities of the coordinating centre, steering committee, endpoint adjudication committee, data management team, and other individuals or groups overseeing the trial, if applicable (see Item 21a for data monitoring committee)                         | N/A                            |

1 **Introduction**

2

3 Background and rationale 6a Description of research question and justification for undertaking the trial, including summary of relevant studies (published and unpublished) examining benefits and harms for each intervention 4-5

4

5

6 6b Explanation for choice of comparators 4-5

7

8 Objectives 7 Specific objectives or hypotheses 5

9

10 Trial design 8 Description of trial design including type of trial (eg, parallel group, crossover, factorial, single group), allocation ratio, and framework (eg, superiority, equivalence, noninferiority, exploratory) 5-6

11

12

13

14 **Methods: Participants, interventions, and outcomes**

15

16 Study setting 9 Description of study settings (eg, community clinic, academic hospital) and list of countries where data will be collected. Reference to where list of study sites can be obtained 6

17

18

19 Eligibility criteria 10 Inclusion and exclusion criteria for participants. If applicable, eligibility criteria for study centres and individuals who will perform the interventions (eg, surgeons, psychotherapists) 6-7

20

21

22 Interventions 11a Interventions for each group with sufficient detail to allow replication, including how and when they will be administered 8-10

23

24

25 11b Criteria for discontinuing or modifying allocated interventions for a given trial participant (eg, drug dose change in response to harms, participant request, or improving/worsening disease) 11

26

27

28 11c Strategies to improve adherence to intervention protocols, and any procedures for monitoring adherence (eg, drug tablet return, laboratory tests) 11-12

29

30

31 11d Relevant concomitant care and interventions that are permitted or prohibited during the trial 6

32

33

34 Outcomes 12 Primary, secondary, and other outcomes, including the specific measurement variable (eg, systolic blood pressure), analysis metric (eg, change from baseline, final value, time to event), method of aggregation (eg, median, proportion), and time point for each outcome. Explanation of the clinical relevance of chosen efficacy and harm outcomes is strongly recommended 12-15

35

36

37

38

39

40 Participant timeline 13 Time schedule of enrolment, interventions (including any run-ins and washouts), assessments, and visits for participants. A schematic diagram is highly recommended (see Figure) 13 and Fig 1

41

42

43

44

45

46

1 Sample size 14 Estimated number of participants needed to achieve study objectives and how it was determined, including 7  
 2 clinical and statistical assumptions supporting any sample size calculations

3  
 4 Recruitment 15 Strategies for achieving adequate participant enrolment to reach target sample size 7  
 5

6 **Methods: Assignment of interventions (for controlled trials)**  
 7

8 Allocation:  
 9

10 Sequence 16a Method of generating the allocation sequence (eg, computer-generated random numbers), and list of any 8  
 11 generation factors for stratification. To reduce predictability of a random sequence, details of any planned restriction  
 12 (eg, blocking) should be provided in a separate document that is unavailable to those who enrol participants  
 13 or assign interventions  
 14  
 15

16 Allocation 16b Mechanism of implementing the allocation sequence (eg, central telephone; sequentially numbered, 8  
 17 concealment opaque, sealed envelopes), describing any steps to conceal the sequence until interventions are assigned  
 18 mechanism  
 19

20 Implementation 16c Who will generate the allocation sequence, who will enrol participants, and who will assign participants to 8  
 21 interventions  
 22  
 23

24 Blinding (masking) 17a Who will be blinded after assignment to interventions (eg, trial participants, care providers, outcome 9  
 25 assessors, data analysts), and how  
 26

27 17b If blinded, circumstances under which unblinding is permissible, and procedure for revealing a participant's 9  
 28 allocated intervention during the trial  
 29  
 30

31 **Methods: Data collection, management, and analysis**  
 32

33 Data collection 18a Plans for assessment and collection of outcome, baseline, and other trial data, including any related 12-15  
 34 methods processes to promote data quality (eg, duplicate measurements, training of assessors) and a description of  
 35 study instruments (eg, questionnaires, laboratory tests) along with their reliability and validity, if known.  
 36 Reference to where data collection forms can be found, if not in the protocol  
 37

38 18b Plans to promote participant retention and complete follow-up, including list of any outcome data to be 11-12  
 39 collected for participants who discontinue or deviate from intervention protocols  
 40  
 41  
 42

|    |                                 |     |                                                                                                                                                                                                                                                                                                                                       |       |
|----|---------------------------------|-----|---------------------------------------------------------------------------------------------------------------------------------------------------------------------------------------------------------------------------------------------------------------------------------------------------------------------------------------|-------|
| 1  | Data management                 | 19  | Plans for data entry, coding, security, and storage, including any related processes to promote data quality (eg, double data entry; range checks for data values). Reference to where details of data management procedures can be found, if not in the protocol                                                                     | 17-18 |
| 2  |                                 |     |                                                                                                                                                                                                                                                                                                                                       |       |
| 3  |                                 |     |                                                                                                                                                                                                                                                                                                                                       |       |
| 4  |                                 |     |                                                                                                                                                                                                                                                                                                                                       |       |
| 5  | Statistical methods             | 20a | Statistical methods for analysing primary and secondary outcomes. Reference to where other details of the statistical analysis plan can be found, if not in the protocol                                                                                                                                                              | 15-17 |
| 6  |                                 |     |                                                                                                                                                                                                                                                                                                                                       |       |
| 7  |                                 |     |                                                                                                                                                                                                                                                                                                                                       |       |
| 8  |                                 | 20b | Methods for any additional analyses (eg, subgroup and adjusted analyses)                                                                                                                                                                                                                                                              | 15-17 |
| 9  |                                 |     |                                                                                                                                                                                                                                                                                                                                       |       |
| 10 |                                 | 20c | Definition of analysis population relating to protocol non-adherence (eg, as randomised analysis), and any statistical methods to handle missing data (eg, multiple imputation)                                                                                                                                                       | 18    |
| 11 |                                 |     |                                                                                                                                                                                                                                                                                                                                       |       |
| 12 |                                 |     |                                                                                                                                                                                                                                                                                                                                       |       |
| 13 |                                 |     |                                                                                                                                                                                                                                                                                                                                       |       |
| 14 | <b>Methods: Monitoring</b>      |     |                                                                                                                                                                                                                                                                                                                                       |       |
| 15 |                                 |     |                                                                                                                                                                                                                                                                                                                                       |       |
| 16 | Data monitoring                 | 21a | Composition of data monitoring committee (DMC); summary of its role and reporting structure; statement of whether it is independent from the sponsor and competing interests; and reference to where further details about its charter can be found, if not in the protocol. Alternatively, an explanation of why a DMC is not needed | 18    |
| 17 |                                 |     |                                                                                                                                                                                                                                                                                                                                       |       |
| 18 |                                 |     |                                                                                                                                                                                                                                                                                                                                       |       |
| 19 |                                 |     |                                                                                                                                                                                                                                                                                                                                       |       |
| 20 |                                 |     |                                                                                                                                                                                                                                                                                                                                       |       |
| 21 |                                 |     |                                                                                                                                                                                                                                                                                                                                       |       |
| 22 |                                 | 21b | Description of any interim analyses and stopping guidelines, including who will have access to these interim results and make the final decision to terminate the trial                                                                                                                                                               | 18    |
| 23 |                                 |     |                                                                                                                                                                                                                                                                                                                                       |       |
| 24 |                                 |     |                                                                                                                                                                                                                                                                                                                                       |       |
| 25 | Harms                           | 22  | Plans for collecting, assessing, reporting, and managing solicited and spontaneously reported adverse events and other unintended effects of trial interventions or trial conduct                                                                                                                                                     | 18    |
| 26 |                                 |     |                                                                                                                                                                                                                                                                                                                                       |       |
| 27 |                                 |     |                                                                                                                                                                                                                                                                                                                                       |       |
| 28 |                                 | 23  | Frequency and procedures for auditing trial conduct, if any, and whether the process will be independent from investigators and the sponsor                                                                                                                                                                                           | 18    |
| 29 |                                 |     |                                                                                                                                                                                                                                                                                                                                       |       |
| 30 |                                 |     |                                                                                                                                                                                                                                                                                                                                       |       |
| 31 |                                 |     |                                                                                                                                                                                                                                                                                                                                       |       |
| 32 | <b>Ethics and dissemination</b> |     |                                                                                                                                                                                                                                                                                                                                       |       |
| 33 |                                 |     |                                                                                                                                                                                                                                                                                                                                       |       |
| 34 | Research ethics approval        | 24  | Plans for seeking research ethics committee/institutional review board (REC/IRB) approval                                                                                                                                                                                                                                             | 19    |
| 35 |                                 |     |                                                                                                                                                                                                                                                                                                                                       |       |
| 36 |                                 |     |                                                                                                                                                                                                                                                                                                                                       |       |
| 37 | Protocol amendments             | 25  | Plans for communicating important protocol modifications (eg, changes to eligibility criteria, outcomes, analyses) to relevant parties (eg, investigators, REC/IRBs, trial participants, trial registries, journals, regulators)                                                                                                      | 19    |
| 38 |                                 |     |                                                                                                                                                                                                                                                                                                                                       |       |
| 39 |                                 |     |                                                                                                                                                                                                                                                                                                                                       |       |
| 40 |                                 |     |                                                                                                                                                                                                                                                                                                                                       |       |
| 41 |                                 |     |                                                                                                                                                                                                                                                                                                                                       |       |
| 42 |                                 |     |                                                                                                                                                                                                                                                                                                                                       |       |



|    |                               |     |                                                                                                                                                                                                                                                                                     |                                                                                                    |
|----|-------------------------------|-----|-------------------------------------------------------------------------------------------------------------------------------------------------------------------------------------------------------------------------------------------------------------------------------------|----------------------------------------------------------------------------------------------------|
| 1  | Consent or assent             | 26a | Who will obtain informed consent or assent from potential trial participants or authorised surrogates, and how (see Item 32)                                                                                                                                                        | 10-11                                                                                              |
| 2  |                               |     |                                                                                                                                                                                                                                                                                     |                                                                                                    |
| 3  |                               |     |                                                                                                                                                                                                                                                                                     |                                                                                                    |
| 4  |                               | 26b | Additional consent provisions for collection and use of participant data and biological specimens in ancillary studies, if applicable                                                                                                                                               | N/A                                                                                                |
| 5  |                               |     |                                                                                                                                                                                                                                                                                     |                                                                                                    |
| 6  |                               |     |                                                                                                                                                                                                                                                                                     |                                                                                                    |
| 7  | Confidentiality               | 27  | How personal information about potential and enrolled participants will be collected, shared, and maintained in order to protect confidentiality before, during, and after the trial                                                                                                | 17-18                                                                                              |
| 8  |                               |     |                                                                                                                                                                                                                                                                                     |                                                                                                    |
| 9  |                               |     |                                                                                                                                                                                                                                                                                     |                                                                                                    |
| 10 | Declaration of interests      | 28  | Financial and other competing interests for principal investigators for the overall trial and each study site                                                                                                                                                                       | 20                                                                                                 |
| 11 |                               |     |                                                                                                                                                                                                                                                                                     |                                                                                                    |
| 12 |                               |     |                                                                                                                                                                                                                                                                                     |                                                                                                    |
| 13 | Access to data                | 29  | Statement of who will have access to the final trial dataset, and disclosure of contractual agreements that limit such access for investigators                                                                                                                                     | 17                                                                                                 |
| 14 |                               |     |                                                                                                                                                                                                                                                                                     |                                                                                                    |
| 15 |                               |     |                                                                                                                                                                                                                                                                                     |                                                                                                    |
| 16 | Ancillary and post-trial care | 30  | Provisions, if any, for ancillary and post-trial care, and for compensation to those who suffer harm from trial participation                                                                                                                                                       | no plans for post-trial care, compensation plan due to injury listed in ICF p2 "In Case of Injury" |
| 17 |                               |     |                                                                                                                                                                                                                                                                                     |                                                                                                    |
| 18 |                               |     |                                                                                                                                                                                                                                                                                     |                                                                                                    |
| 19 |                               |     |                                                                                                                                                                                                                                                                                     |                                                                                                    |
| 20 |                               |     |                                                                                                                                                                                                                                                                                     |                                                                                                    |
| 21 |                               |     |                                                                                                                                                                                                                                                                                     |                                                                                                    |
| 22 |                               |     |                                                                                                                                                                                                                                                                                     |                                                                                                    |
| 23 |                               |     |                                                                                                                                                                                                                                                                                     |                                                                                                    |
| 24 |                               |     |                                                                                                                                                                                                                                                                                     |                                                                                                    |
| 25 | Dissemination policy          | 31a | Plans for investigators and sponsor to communicate trial results to participants, healthcare professionals, the public, and other relevant groups (eg, via publication, reporting in results databases, or other data sharing arrangements), including any publication restrictions | 19                                                                                                 |
| 26 |                               |     |                                                                                                                                                                                                                                                                                     |                                                                                                    |
| 27 |                               |     |                                                                                                                                                                                                                                                                                     |                                                                                                    |
| 28 |                               |     |                                                                                                                                                                                                                                                                                     |                                                                                                    |
| 29 |                               | 31b | Authorship eligibility guidelines and any intended use of professional writers                                                                                                                                                                                                      | 19                                                                                                 |
| 30 |                               |     |                                                                                                                                                                                                                                                                                     |                                                                                                    |
| 31 |                               | 31c | Plans, if any, for granting public access to the full protocol, participant-level dataset, and statistical code                                                                                                                                                                     | 19                                                                                                 |
| 32 |                               |     |                                                                                                                                                                                                                                                                                     |                                                                                                    |
| 33 |                               |     |                                                                                                                                                                                                                                                                                     |                                                                                                    |
| 34 | <b>Appendices</b>             |     |                                                                                                                                                                                                                                                                                     |                                                                                                    |
| 35 |                               |     |                                                                                                                                                                                                                                                                                     |                                                                                                    |
| 36 | Informed consent materials    | 32  | Model consent form and other related documentation given to participants and authorised surrogates                                                                                                                                                                                  | supplemental                                                                                       |
| 37 |                               |     |                                                                                                                                                                                                                                                                                     |                                                                                                    |
| 38 |                               |     |                                                                                                                                                                                                                                                                                     |                                                                                                    |
| 39 | Biological specimens          | 33  | Plans for collection, laboratory evaluation, and storage of biological specimens for genetic or molecular analysis in the current trial and for future use in ancillary studies, if applicable                                                                                      | N/A                                                                                                |
| 40 |                               |     |                                                                                                                                                                                                                                                                                     |                                                                                                    |
| 41 |                               |     |                                                                                                                                                                                                                                                                                     |                                                                                                    |
| 42 |                               |     |                                                                                                                                                                                                                                                                                     |                                                                                                    |

1 \*It is strongly recommended that this checklist be read in conjunction with the SPIRIT 2013 Explanation & Elaboration for important clarification on the items.  
2 Amendments to the protocol should be tracked and dated. The SPIRIT checklist is copyrighted by the SPIRIT Group under the Creative Commons  
3 [“Attribution-NonCommercial-NoDerivs 3.0 Unported”](#) license.  
4  
5  
6  
7  
8  
9  
10  
11  
12  
13  
14  
15  
16  
17  
18  
19  
20  
21  
22  
23  
24  
25  
26  
27  
28  
29  
30  
31  
32  
33  
34  
35  
36  
37  
38  
39  
40  
41  
42  
43  
44  
45  
46

For peer review only
